# Supplementary material
Source: PubMed Central journal article supplement (PMC5985217)

## Materials and Methods

### *Case selection and tissue microarray construction*

Study approval was obtained from the University of Pittsburgh (IRB# PRO13020493) and Washington University (201404143) Institutional Review Boards. The surgical pathology archives from the Departments of Pathology at the University of Pittsburgh Medical Center and Barnes-Jewish Hospital were queried for neuroendocrine neoplasms of the pancreas between 1995 and 2014 that underwent enucleation, central pancreatectomy, pancreaticoduodenectomy or distal pancreatectomy. Cases were cross-referenced with clinical and follow-up data obtained from patient paper and/or electronic medical records. The study inclusion criteria consisted of the following: a solitary, well-differentiated neuroendocrine tumor (confirmed with positive immunolabeling for neuroendocrine markers [e.g. synaptophysin and chromogranin A]) centered within the pancreas, surveillance and survival data of >2 years, absence of a genetic syndrome associated with pancreatic neuroendocrine neoplasms (e.g. multiple endocrine neoplasia type 1 [MEN 1] syndrome, von Hippel-Lindau [VHL] syndrome, neurofibromatosis type 1 [NF1] syndrome, and tuberous sclerosis complex [TSC] syndrome), and cases with sufficient material for ancillary studies.

In total, 367 patients with a resected PanNET fulfilled the aforementioned criteria. In addition, the surgical pathology archives from the respective institutions were cross-referenced to identify corresponding distant metastases with sufficient pathologic material for ancillary studies. Among 120 patients with distant metastases, 72 patients had pathologic material available of the distant metastasis for ancillary studies. For whole-exome sequencing, 20 distant metastatic PanNETs from 20 patients were selected

Pathologic material of the surgically resected primary PanNET from the remaining 347 patients was used to create high-density tissue microarrays (TMAs) as previously described.<sup>1</sup> High-density TMAs were constructed using archival FFPE tissue blocks. Three, 1.0 mm-sized cores were punched from representative areas of each patient's tumor and collected into recipient blocks. Sufficient tissue for ancillary studies on cut sections was confirmed prior to immunohistochemical testing and fluorescence in situ hybridization. Details of both whole-exome sequencing and PanNET cohorts are discussed in detail in the Supplementary Data Section.

Clinical and demographic data were reviewed for each case. Corresponding pathology gross reports and hematoxylin-and-eosin (H&E) stained slides were also reviewed for the following pathologic features: tumor size, location, lymphovascular invasion, perineural invasion, extension outside of the pancreas and regional lymph node metastasis. Each PanNET was graded using the 2010 World Health Organization (WHO) classification system for pancreatic neuroendocrine neoplasms.<sup>2</sup> Briefly, on the basis of mitotic rate and Ki-67 immunohistochemistry, the following criteria were used: Grade 1 (G1), <2 mitoses/10 high-power fields (hpf) and Ki-67 of <3%; Grade 2 (G2), 2 to 20 mitoses/10 hpf or Ki-67 of 3% to 20%; and Grade 3 (G3), >20 mitoses/10 hpf or Ki-67 of >20%. The mitotic rate was derived from evaluation of multiple sections in 50 hpf (400x, field diameter 0.55 mm<sup>2</sup>) and expressed as mitoses/10 hpf. For Ki-67, at least 500 neoplastic nuclei were counted in the highest staining region for each case with careful exclusion of non-neoplastic cells.<sup>3</sup> A labeling index was calculated and expressed as a percentage. For cases with discordant mitotic rate and Ki-67 measurements, the highest grade was assigned. Pathologic primary tumor classification was determined according to the American Joint Committee on Cancer (AJCC) Staging Manual,

seventh edition.<sup>4</sup> Follow-up information was extracted from the patient's paper and electronic medical records to include data on surveillance, disease recurrence/distant metastasis, and survival.

*Whole-exome sequencing: sample and library preparation and next-generation sequencing*

Whole-exome sequencing was performed in the University of Pittsburgh Cancer Institute, Cancer Genomics Facility (CGF). Ten, 5  $\mu$ m unstained formalin-fixed, paraffin-embedded (FFPE) sections from both tumor and normal were used sample and library preparation. Paraffin was melted in an air incubator (60°C, 30 min), removed by submerging in 100% xylene (5 min) and rinsing in 100% ethanol three times followed by centrifugation (R5810; S4-104 rotor with slide adaptor; Eppendorf, Hamburg, Germany; 1000g; 5 min). Each unstained slide was aligned in register with its corresponding H&E and the demarcated tumor or normal phenotype domain was manually dissected with a sterile scalpel with substrate accumulated across serial slides in a 2.0 mL low retention, nuclease free tube in which the substrate underwent 2 additional xylene and ethanol washes. A stereomicroscope was utilized to assist manual microdissection (Olympus SZ61 microscope, Olympus Corp., Center Valley, PA) as needed. DNA purification was performed on all samples using the QiaAmp FFPE DNA extraction kit (Qiagen, Hilden, Germany) beginning with an overnight incubation in lysis buffer (Buffer ATL: Proteinase K; 300  $\mu$ L:100  $\mu$ L, 56°C, shaking at 600 rpm) followed by a 100  $\mu$ L proteinase spike-in and a 24 hour lysis. After the second lysis regimen, the substrate was denatured (90°C; 60 min); subjected to ethanol precipitation (2X volume and buffer AL); and QIAamp column capture was performed using a 2 mL flow-through collection tube (6000g, 1 min). The column was serially washed (buffer AW1, AW2; 6000g, 1 min) and dried (20,000g; 3 min) and the DNA eluted in low TE

buffer (53 uL Tris 10 mM; EDTA 0.1 mM, pH 8.0; 20,000g, 5 min). QA/QC analysis was performed utilizing an established pipeline including spectrophotometry for purity (NanoDrop 1000, OD 260/280 >1.8; Thermo Scientific, Grand Island, NY, USA), quantitative fluorometry for double stranded DNA yield (Qubit-High Sensitivity, >100 ng dsDNA, Thermo Scientific) and micro-capillary electrophoresis to determine DNA integrity (Bioanalyzer 2100, fragment size >500 bp, Agilent, Santa Clara, CA, USA).

The DNA samples were subjected to acoustical shearing (200ng, 50µl low TE) using a Covaris S1 (Covaris, Woburn, MA, USA) to obtain a fragment size of 150-170 bp for processing with the SureSelectXT library Prep kit (SSXT: #G9611A, Agilent). End repair was performed on individual samples (10X End Repair Buffer: 10 uL, dNTP mix: 1.6 uL, DNA polymerase: 1 uL, Klenow DNA polymerase: 2 uL, T4 Polynucleotide Kinase: 2.2 uL, nuclease free H<sub>2</sub>O: 33.2 uL; 60 min, 20°C) and the DNA captured using Agencourt AMPure beads (#A63881; Beckman-Coulter, Indianapolis, IN) with elution in nuclease free H<sub>2</sub>O. End-repaired DNA underwent 3' adenylation (10x Klenow Polymerase Buffer: 5 uL, dATP: 1uL, Exo (-) Klenow enzyme: 3 µl, NF H<sub>2</sub>O: 11 µl; 37°C, 30 min) followed by AMPure bead purification. Adapters were ligated to the paired ends (5x T4 DNA Ligase Buffer: 10 uL, T4 DNA Ligase: 1.5 uL, undiluted Adaptor Oligo Mix: 10 uL, nuclease free H<sub>2</sub>O: 15.5 uL; 20°C, 15 min) followed by AMPure bead purification and PCR amplification was performed (98°C: 2 min, 10 cycles at 98°C: 30 sec; 65°C: 30 sec; 72°C: 1 min; 72°C: 10 min) using SS primers (#G9611A) and the Herculase II Fusion DNA polymerase kit (#600679, Agilent). The DNA samples underwent QC to ensure adequate yield (>500 ng) of fragments 225 to 275 bp after PCR and AMPure bead purification.

Hybridization (SS Human All Exon V6, Agilent) was performed on individual samples (500ng DNA: 3.4 uL, SureSelect Block: 5.6 uL) which were then denatured at 95°C prior to

mixing with capture baits (hyb buffer: 13 uL, baits: 5 uL, RNase Block: 2 uL; 65°C, 24hrs). Hybridization products were then captured by incubation with streptavidin T1 beads (Dynabeads MyOne Streptavidin T1, Thermo Fisher, Waltham, MA, USA) in SS binding buffer (room temp, 30 min) followed by separation in a magnetic rack. Beads were washed (SS wash 2, 200 uL, 65°C, 10 min) and resuspended in H<sub>2</sub>O followed by amplification with indexing primers (Illumina, San Diego, CA, USA) generating unique bar codes for each sample (H<sub>2</sub>O: 18.5 uL, 5X Herculase II reaction buffer: 10 uL, 100 mM dNTP: 0.5 uL, Herculase polymerase: 1uL, indexing post-capture PCR primer: SSXT Index Reverse primers: 5 uL, DNA: 14 uL; 98°C: 2 min; 11 cycles 98°C: 30 sec; 57°C: 30 sec; 72°C: 1 min). The DNA library was recovered using AMPure beads. Sequencing was performed using the NextSeq 500 (Illumina, San Diego, CA, USA) high output flow cell kit (2 x 76 paired end, 150 cycles) with samples concentrated (660 g/mol X bp fragment size x 1X10<sup>6</sup>), pooled and titrated to 1.7 pM per sample to achieve an average base call target depth of 63x to 102x.

#### *Sequencing data processing and variant detection*

Bioinformatics analysis was performed using a custom protocol developed for tumor and paired normal analysis. First, base call (BCL) files were converted to FASTQ files using beltofastq (Illumina, San Diego, CA, USA). Per lane FASTQ files were merged into FASTQ files for each read pair (R1 & R2), as per manufacturer's recommendation. Each set of read pair FASTQs were aligned to the human reference genome (GRCh37.p13, hg19; GCF\_000001405.25) using BWA MEM and encoded into a BAM (binary sequence alignment) format using Samtools.<sup>5, 6</sup> RG (read group) tags for each sample were added at the time of sequence alignment. The raw BAM files were sorted, indexed and PCR duplicates marked using

Sambamba.<sup>7</sup> Pre-variant calling processing included concurrent local realignment around regions of known indels (COSMIC v80, dbSNPv138 and Mills gold-standard indel sets) for both tumor and normal aligned reads using GATK.<sup>8-10</sup> Subsequently, realigned BAMs were subjected to BQSR (Base Quality Score Recalibration) using GATK. Subsequently, variant calling was performed on the recalibrated BAMs using Varscan2 for SNV and short Indel detection and Scalpel for larger Indel detection.<sup>11, 12</sup> Briefly for Varscan2, recalibrated BAM files for both tumor and normal were used to generate a paired tumor-normal sequence mpileup, which was used for calling variants using Varscan2 in somatic mode. Potential false positives were marked in the VCF files using Varscan2's ffilter based on specific parameters. Variants marked as somatic and high confidence by the variant caller were prioritized. For large indel detection, Scalpel was used in somatic (paired tumor-normal) mode. Variants were represented using VCF format v4.2 (<https://samtools.github.io/hts-specs/VCFv4.2.pdf>). Variant calls from both callers were integrated, normalized and annotated using custom python modules with dependencies on ANNOVAR and HGVS python package.<sup>13, 14</sup> For FASTQ and BAM files, quality control (QC) metrics were generated by FastQC (<http://www.bioinformatics.babraham.ac.uk/projects/fastqc/>) and QualiMap, respectively.<sup>15</sup> For variant calling, sequence reads with minimum base quality score (Phred score) of 30 and minimum mapping quality score of 20 were used. Integrative Genomics Viewer (IGV, Broad Institute) was used for manual review of sequence pileups and detected variants.<sup>16</sup> Genomic data was visualized and reviewed using custom developed javascript plugin, jsComut (<https://github.com/pearcetm/jscomut>).

#### *Gene and variant prioritization*

Variants and genes were prioritized following the 2017 AMP/ASCO/CAP joint consensus guidelines for interpretation of sequence variants in cancer.<sup>17</sup> Briefly, variants that were present at a minor allele frequency greater than or equal to 1% in population databases (1000genomes, ExAC-nonTCGA and Exome server variant) were filtered out as benign/likely benign.<sup>18-20</sup> Subsequently, non-coding variants in deep intronic, intergenic and untranslated regions, and missense variants with benign/tolerated in silico predictions (SIFT and PolyPhen2) were also filtered out.<sup>21, 22</sup> Truncating variants that introduced premature stop codon (frameshift deletions and insertions, stop gain and splice site) in genes where loss of function is associated with oncogenesis, were prioritized as tier I/II and included for analysis. Similarly, missense and inframe indels in genes where gain of function is implicated in oncogenesis were prioritized as Tier I/II variants based on incidence in public somatic mutation databases (COSMIC v80 and TCGA), review of gene specific published functional studies, and damaging/deleterious in silico predictions.<sup>17, 23</sup> Germline mutation database (ClinVar) was also reviewed for prioritization of a subset of variants.<sup>24</sup> Unless supporting data for pathogenicity was available from published literature or public databases, Tier III variants (variants of uncertain clinical significance) were not prioritized.<sup>17</sup>

#### *Copy number variation analysis*

Copy number analysis was performed using Nexus Biodiscovery software (version 8.1, El Segundo, CA) designed to take into consideration the significant mosaicism, hyperploidy and normal cell heterogeneity that is present in cancer samples even after microdissection to enrich for tumor cells. Match paired next-generation sequencing analysis required 2 BAM files comprising the tumor and normal sequence for each specimen which were combined into one

result via subtraction of the  $\log_2$  ratios revealing copy number changes specific to the tumor sample. The GISTIC algorithm was used to identify aggregate regions with a statistically high frequency of copy number aberrations (gains and losses) from the global data set.<sup>25</sup> This method applies FDR (false discovery rate) correction for multiple testing and computes the Q-bound values (Q-Bound cutoff = 0.05, G-Score cut-off = 1.0). Individual gene queries employed the STAC (Significance testing for Aberrant Copy Number) algorithm using a minimum of 1000 reference reads per segment and the Nexus FASST2 (Fast Adaptive States Segmentation Technique) Segmentation algorithm with significance value =  $1 \times 10^{-6}$ .<sup>26</sup>

In addition, CNVKit (0.8.6.dev) was used as an alternate method to assess copy number changes from whole exome sequencing.<sup>27</sup> Briefly, a pool of normal reference was created using the aligned sequences from the paired normal samples. Subsequently, target and anti-target regions were created using the SureSelect exome v6 BED file. Next, the binned coverage for each of the loci in the target and the anti-target regions were computed. The binned coverage from the pool of normal reference was then used to normalize each tumor sample and correct biases (e.g. GC bias). Finally, copy number ratios were calculated and segmented using circular binary segmentation. Copy number changes were assessed manually using scatter plot visualization provided by CNVKit and compared to the calls made by the Nexus Biodiscovery software.

### *Immunohistochemistry*

TMA slides were cut at 4-um and deparaffinized with serial xylene treatments and subjected to antigen retrieval using heated citrate solution (pH 9.0) at 100°C for 10 minutes. Immunolabeling for Ki-67 (mouse monoclonal, prediluted, Ventana Medical Systems, Tucson,



AZ, USA), synaptophysin (rabbit polyclonal, prediluted, Cell Marque, Rocklin, CA, USA), chromogranin A (mouse monoclonal, prediluted, Ventana Medical Systems, Tucson, AZ, USA), DAXX (HPA008736 rabbit polyclonal, dilution 1:50, Sigma Aldrich, St Louis, MO, USA) and ATRX (HPA001906 rabbit polyclonal, dilution 1:100, Sigma Aldrich, St Louis, MO, USA), H3K36me3 (AB9050 rabbit polyclonal, dilution 1:1000, Abcam, Eugene, OR, USA), and ARID1A (AB182560 rabbit monoclonal, dilution 1:1000, Abcam, Eugene, OR, USA) were performed on the automated Ventana Benchmark XT system using the biotin-free Ventana OptiView DAB IHC Detection Kit (Ventana Medical Systems, Tucson, AZ, USA).

Assessment of DAXX, ATRX, H3K36me3 and ARID1A was done blinded to any patient data including outcome. Preserved or “positive” expression was defined as nuclear staining within tumor cells; using stromal cells as a positive internal control. Loss or “negative” staining was scored in cases where the tumor lacked nuclear immunolabeling, but preserved expression within stromal cells was still identified. Intratumoral heterogeneity or heterogeneous staining was defined as the clear presence of two distinct populations of tumor cells demonstrating preserved and loss of nuclear staining. For cases with heterogeneous staining, each component (positive or preserved and negative or loss of nuclear staining) should comprise at least 10% of the neoplastic tissue.<sup>1</sup> For subsequent statistical analysis, these cases were scored as loss or negative staining.

#### *Fluorescence in situ hybridization*

Telomere-specific FISH was performed as previously described using an Alexa-488 telomeric-C PNA probe.<sup>1</sup> In brief, 4-um TMA sections were incubated for 30 min at 55°C, washed three times for 5 min in xylene, rinsed in successive 100%, 95%, and 70% ethanol baths,

and washed in double-distilled H<sub>2</sub>O and 1% Tween before being placed in antigen unmasking solution in a boiling steamer for 30 min. Next, slides were rinsed in double-distilled H<sub>2</sub>O and dehydrated in successive ethanol washes of 70%, 95%, and 100%. Slides were incubated at 72°C for 10 min with an Alexa-488 telomeric-C PNA probe and hybridized overnight in a dark humidity chamber. Slides were washed with PNA wash buffer and PBST and incubated for 10 min in DAPI solution. After washing in double-distilled H<sub>2</sub>O, slides were mounted with prolong anti-fade mounting medium. Images were taken on a Leica fluorescent light microscope.<sup>28</sup>

Scoring for ALT was performed by assessing at least 250 nuclei from all 3 tissue cores for each case (at least 750 tumor nuclei). Using previously described criteria, ALT-positive cases were defined by the presence of large, ultrabright intranuclear foci consistent with telomere FISH signals in at least 1% of tumor nuclei and the total signal intensity for individual foci >10 fold than telomere signals from stromal cells. Of note, areas of necrosis were excluded from evaluation. Among ALT-negative PanNETs, no large, ultrabright, intranuclear signals were found in over 750 tumor nuclei that were screened.

Dual color fluorescence in situ hybridization was performed for *CDKN2A* within a Clinical Laboratory Improvement Amendments (CLIA)-accredited and College of American Pathologist (CAP)-approved laboratory as previously reported.<sup>29</sup> *CDKN2A* was assessed using a Spectrum-Orange labeled, locus-specific probe (Abbott Molecular, Des Plaines, IL, USA) with a Spectrum Green-labeled chromosome 9 centromeric (CEP9) probe. Scoring of *CDKN2A* FISH was performed on only individual and well-delineated cells; overlapping cells were excluded from the analysis. At least 60 cells were scored for each case and controls. Each tumor was assessed by the average and the maximum numbers of copies of p16 gene per cell and the average ratio of p16 gene to chromosome 9 copy numbers (CEP9). Deletion was defined if both

*CDKN2A* signals were lost in at least 20% of nuclei and showed at least one signal for the CEP9 probe.

### *Statistical analysis*

Chi-squared analysis or Fisher exact tests were used to compare categorical data, and analysis of variance was used to compare continuous variables. Survival curves were constructed using the Kaplan-Meier method and differences between groups were evaluated by the log-rank test. Disease-free survival (DFS) was calculated from the date of surgery to the date of first distant metastasis/recurrence after surgery or to the date of last follow-up (in patients without distant metastasis/recurrence) for cases without synchronous distant metastasis. Disease-specific survival (DSS) was calculated from the date of surgery to the date of death due to disease or date of last follow-up (if death did not occur). The prognostic significance of clinical and pathologic characteristics was determined using univariate Cox regression analysis. Multivariate analyses of significant risk factors by univariate analysis were performed using Cox proportional hazard regression to identify independent risk factors for both DFS and DSS. All statistical analyses were performed using the SPSS Statistical software, version 24 (IBM, Armonk, NY) and statistical significance was defined as a p value of  $< 0.05$ .

## Supplementary Data

### *Distant metastatic PanNET whole-exome sequencing cohort*

The whole-exome sequencing cohort consisted of 20 distant metastases from 20 patients with a solitary, non-syndromic PanNET. At initial presentation, patients ranged in age from 42 to 80 years (mean, 55.1 years) and included 11 females and 9 males. The patients' corresponding primary tumors were treated by either pancreaticoduodenectomy (n = 10) or distal pancreatectomy (n = 10) and pathologically confirmed to be of pancreatic origin. The primary PanNETs were distributed within the pancreas as follows: 10 in the head, 7 in the tail and 3 in the body; and ranged in size from 2.5 to 18 cm (mean, 6.2 cm). None of the PanNETs were biochemically functional.

The metastatic PanNETs consisted of 9 synchronous and 11 metachronous distant metastases, which were surgically resected from the liver (n = 19) or remnant pancreas (n = 1). Among the metachronous distant metastases, the time interval between pancreaticoduodenectomy or distal pancreatectomy and metastasectomy ranged between 1.7 to 7.8 years (mean, 4.5 years). Prior to metastasectomy, 6 of 20 (30%) patients received chemotherapy (n = 5) and/or underwent transarterial chemoembolization (TACE) to the liver (n = 2, MetaPanNET-7 and -17). All 6 patients presented with metachronous metastases. Among 5 patients that received chemotherapy, 3 patients received octreotide (MetaPanNET-10, -17 and -19) and 1 patient received everolimus (MetaPanNET-19). MetaPanNET-5 received multiple regimens of chemotherapy that included cisplatin and etoposide, carboplatin and etoposide, and irinotecan hydrochloride. Although neoadjuvant chemotherapy was documented for MetaPanNET-13, the exact regimen the patient received is unknown. While all metastatic PanNETs were morphologically well-differentiated, on the basis of mitotic rate and Ki-67

proliferation index, the tumors were classified into the following WHO grades: 1 (5%) grade 1 (G1), 13 (65%) grade 2 (G2), and 6 (30%) grade 3 (G3). Telomere-specific FISH identified ALT in 12 (60%) metastatic PanNETs and loss of nuclear expression for DAXX, ATRX or both proteins was seen in 4 (20%), 4 (20%), and 3 (15%) cases, respectively. One (5%) ALT-positive PanNET had preserved expression for DAXX/ATRX.

#### *Primary PanNET study cohort*

The study cohort consisted of 347 patients with a solitary PanNET treated by enucleation (n = 14), central pancreatectomy (n = 15), pancreaticoduodenectomy (n = 131) or distal pancreatectomy (n = 187) to include resection of identifiable metastases with curative intent. None of the patients received neoadjuvant chemotherapy, radiation or chemoembolization prior to surgical intervention. Patients ranged in age from 26 to 85 years (mean, 59 years) with a slight predominance in male gender (181 of 347, 52%). Thirty-six of 347 (10%) patients had a functional PanNET and included: 21 insulinomas, 8 gastrinomas, 5 glucagonomas, 1 somatostatinoma, 1 VIPoma and 1 ACTH-producing PanNET. The tumors were predominantly located within the pancreatic body and tail (n = 216, 62%) and ranged in size from 0.6 to 18 cm (mean, 3.4 cm). All PanNETs were morphologically well-differentiated, and, on the basis of mitotic rate and Ki-67 proliferation index, these tumors were classified into the following WHO grades: 199 (57%) grade 1 (G1), 140 (40%) grade 2 (G2), and 8 (3%) grade 3 (G3). Lymphovascular and perineural invasion were identified in 153 (44%) and 91 (26%) tumors, respectively. Using the AJCC prognostic staging system (seventh edition), the PanNETs were classified into the following pathologic tumor (pT) stages: 121 (35%) pT1, 106 (30%) pT2, and 120 (35%) pT3. Regional lymph nodes were submitted for histologic evaluation in 294 (85%)

cases with involvement of 110 (of 294, 37%) cases. At the time of surgery, 54 (16%) patients were found to have synchronous distant metastases that were resected. Of the remaining 292 patients, metachronous distant metastases were identified in 45 (of 292, 15%) cases. The DFS rates for these 292 patients were 91% at 3 years and 83% at 5 years. For all 347 patients, the DSS rates were 90% at 5 years and 76% at 10 years.

Immunohistochemistry for DAXX and ATRX and telomere-specific FISH were performed for all 347 PanNETs. Loss of nuclear expression for DAXX, ATRX, or both was identified in 37 (11%), 29 (8%), and 14 (4%) PanNETs, respectively. Of note, among the DAXX/ATRX-negative cases, heterogeneous loss of expression was seen in 1 DAXX-negative and 3 ATRX-negative PanNETs.<sup>1</sup> For these cases, the number of neoplastic nuclei lacking staining for DAXX/ATRX ranged between 65% to 80%. In addition, 94 (27%) PanNETs demonstrated large, ultrabright intranuclear foci consistent with ALT. The presence of ALT correlated with DAXX/ATRX loss ( $p < 0.001$ ), but 14 (4%) ALT-positive PanNETs had preserved expression for DAXX/ATRX. Similar to DAXX and ATRX, heterogeneous loss of expression was seen in 1 of 28 H3K36me3-negative PanNETs with lack of staining in 80% of the neoplastic nuclei, while all 10 ARID1A-negative PanNETs exhibited complete loss of nuclear expression for ARID1A.

Patients with PanNETs exhibiting loss of DAXX/ATRX, H3K36me3, or deletion in *CDKN2A* were associated with shorter DFS; while, patients with PanNETs showing loss of DAXX/ATRX, H3K36me3, ARID1A or deletion in *CDKN2A* were associated with poor DSS (Supplementary Figure 3). Disease-free survival (DFS) rates for patients with DAXX/ATRX-negative (loss of DAXX/ATRX) PanNETs were 60% at 3 years and 40% at 5 years ( $p < 0.001$ ,  $X^2 = 96.5$ ), H3K36me3-negative PanNETs were 86% at 3 years and 11% at 5 years ( $p < 0.001$ ,

$X^2 = 28.3$ ), ARID1A-negative PanNETs were 80% at 3 years and 60% at 5 years ( $p = 0.221$ ,  $X^2 = 1.50$ ), and *CDKN2A*-negative PanNETs were 53% at 3 years and 38% at 5 years ( $p < 0.001$ ,  $X^2 = 50.2$ ). In comparison, DSS rates for patients with DAXX/ATRX-negative PanNETs were 78% at 5 years and 48% at 10 years ( $p < 0.001$ ,  $X^2 = 21.5$ ), H3K36me3-negative PanNETs were 71% at 5 years and 34% at 10 years ( $p < 0.001$ ,  $X^2 = 13.9$ ), ARID1A-negative PanNETs were 80% at 5 years and 27% at 10 years ( $p < 0.001$ ,  $X^2 = 13.6$ ), and *CDKN2A*-negative PanNETs were 69% at 5 years and 35% at 10 years ( $p < 0.001$ ,  $X^2 = 18.8$ ).

Results of Cox regression analysis for DFS and DSS in relationship to various clinicopathologic features is presented in Table 1. By univariate Cox regression analysis, shorter DFS and poor DSS were associated with age ( $p = 0.008$  and  $p = 0.038$ , respectively), tumor size  $> 2.0$  cm ( $p < 0.001$  and  $p = 0.001$ ), G2-to-G3 WHO grade ( $p < 0.001$  and  $p < 0.001$ , respectively), lymphovascular invasion ( $p < 0.001$  and  $p < 0.001$ ), perineural invasion ( $p < 0.001$  and  $p < 0.001$ ), advanced tumor stage ( $p < 0.001$  and  $p < 0.001$ ) and regional lymph node (pN) metastasis ( $p < 0.001$  and  $p < 0.001$ ). A separate univariate analysis was performed for DAXX/ATRX and H3K36me3/ARID1A/*CDKN2A* status, independently. Loss of DAXX/ATRX and loss/deletion of H3K36me3/ARID1A/*CDKN2A* were associated with shorter DFS (HR = 12.08 [95% CI, 6.42 – 22.75],  $p < 0.001$ ; HR = 9.07 [95% CI, 4.99 – 16.49],  $p < 0.001$ , respectively) and poor DSS (HR = 3.67 [95% CI, 2.04 – 6.61],  $p < 0.001$ ; HR = 6.35 [95% CI, 3.52 – 11.48],  $p < 0.001$ , respectively). Multivariate analysis was used to determine the prognostic significance of H3K36me3/ARID1A/*CDKN2A* status for DFS and DSS and included tumor size  $> 2.0$  cm, WHO grade, regional lymph node metastasis and DAXX/ATRX loss. Independent prognostic factors for shorter DFS included tumor size  $> 2.0$  cm (HR = 17.08 [95% CI, 2.31 – 126.40],  $p = 0.005$ ), regional lymph node metastasis (HR = 2.03 [95% CI, 1.05 –

3.90],  $p = 0.034$ ), DAXX/ATRX loss (HR = 4.64 [95% CI, 2.39 – 9.04],  $p < 0.001$ ) and H3K36me3/ARID1A/CDKN2A loss/deletion (HR = 3.63 [95% CI, 1.93 – 6.81],  $p < 0.001$ ). In comparison, independent prognostic factors for poor DSS included tumor size  $> 2.0$  cm (HR = 9.47 [95% CI, 1.29 – 69.56],  $p = 0.027$ ), G2-to-G3 WHO grade (HR = 2.29 [95% CI, 1.09 – 4.78],  $p = 0.028$ ), regional lymph node metastasis (HR = 2.30 [95% CI, 1.14 – 4.65],  $p = 0.020$ ) and H3K36me3/ARID1A/CDKN2A loss/deletion (HR = 3.07 [95% CI, 1.65 – 5.68],  $p < 0.001$ ). Consistent with our prior study, DAXX/ATRX loss was not an independent prognostic factor for DSS.<sup>1</sup>

#### **Acknowledgements**

The authors would like to thank Mrs. Kate Smith for outstanding administrative assistance. We also thank Siraj Ali, MD from Foundation Medicine, Inc. for sharing unpublished data. This study was supported in part by a grant from the National Pancreas Foundation, Western Pennsylvania Chapter (to A. D. Singhi). This project utilized the University of Pittsburgh Cancer Institute shared resource facility (Cancer Genomics Facility) supported in part by award P30CA047904 (to W. A. LaFramboise).



### Supplementary Figure Legends

Supplementary Figure 1. Key genomic alterations identified in 20 metastatic pancreatic neuroendocrine tumors (PanNETs). (A) Each metastatic PanNET was classified based on World Health Organization (WHO) grade, timing of metastasis (synchronous versus metachronous with respect to the patient's primary PanNET), and ATRX and DAXX immunohistochemistry, and telomere-specific fluorescence *in situ* hybridization for alternative lengthening of telomeres (ALT). These findings were correlated with recurrent genomic alterations identified by whole-exome sequencing and compared to those previously published by Scarpa et al.<sup>30</sup> Somatic mutations and copy number variation are colored according to functional class. Copy number variation analysis was performed using the Nexus Biosdiscovery software (version 8.1, El Segundo, CA) and CNVKit (0.8.6.dev) comparing matched pairs of metastatic PanNETs and normal controls. (B) Recurrent copy number loss was identified within the genomic locus that includes *CDKN2A*. An example of a metastatic PanNET (MetaPanNET-3) with copy number loss at the 9p21 locus (gray dots) and a deep deletion present in *CDKN2A* (red dots).

Supplementary Figure 2. Representative examples of pancreatic neuroendocrine tumors (PanNETs) evaluated for H3K36me3 and ARID1A by immunohistochemistry and *CDKN2A* (orange) by dual-color fluorescence *in situ* hybridization (chromosome 9, green). (A) PanNET with preserved nuclear expression for both H3K36me3 (B) and ARID1A (C), and homozygous deletion of *CDKN2A* (D, loss of both orange signals, but retention of at least one green signal; white arrow, highlights a *CDKN2A* wild type stromal fibroblast). (E) PanNET with H3K36me3 loss (F), but preserved expression for ARID1A (G) and wild type *CDKN2A* (H). (I) PanNET with ARID1A loss (K), but preserved expression for H3K36me3 (J) and wild type *CDKN2A* (L).

Supplementary Figure 3. Kaplan-Meier curves comparing the cumulative probabilities of disease-free survival (DFS) and disease-specific survival (DSS) after surgical resection among 282 patients (without synchronous distant metastases) and 347 patients with PanNETs, respectively, for DAXX/ATRX, H3K36me3, ARID1A and *CDKN2A* status. Patients with PanNETs harboring loss or deletion of DAXX/ATRX, H3K36me3 or *CDKN2A* were associated with reduced time of DFS (A, B and D); while, loss or deletion of DAXX/ATRX, H3K36me3, ARID1A or *CDKN2A* was associated with reduced time of DSS (E, F, G and H), as compared to patients with wild type PanNETs.

## References

1. Singhi AD, Liu TC, Roncaioli JL, et al. Alternative Lengthening of Telomeres and Loss of DAXX/ATRAX Expression Predicts Metastatic Disease and Poor Survival in Patients with Pancreatic Neuroendocrine Tumors. *Clin Cancer Res* 2017;23:600-609.
2. Bosman FT, Carneiro F, Hruban RH, et al. World Health Organization (WHO) Classification of Tumours of the Digestive System. Lyon, France: IARC Press, 2010.
3. Reid MD, Bagci P, Ohike N, et al. Calculation of the Ki67 index in pancreatic neuroendocrine tumors: a comparative analysis of four counting methodologies. *Mod Pathol* 2015;28:686-94.
4. Edge SB, Byrd DR, Compton CC, et al. Exocrine and endocrine pancreas. *AJCC Cancer Staging Manual*. 7th ed. New York, NY: Springer, 2010:241-9.
5. Li H. Aligning sequence reads, clone sequences and assembly contigs with BWA-MEM, 2013.
6. Li H, Handsaker B, Wysoker A, et al. The Sequence Alignment/Map format and SAMtools. *Bioinformatics* 2009;25:2078-9.
7. Tarasov A, Vilella AJ, Cuppen E, et al. Sambamba: fast processing of NGS alignment formats. *Bioinformatics* 2015;31:2032-4.
8. Forbes SA, Beare D, Gunasekaran P, et al. COSMIC: exploring the world's knowledge of somatic mutations in human cancer. *Nucleic Acids Res* 2014;43:D805-11.
9. Sherry ST, Ward MH, Kholodov M, et al. dbSNP: the NCBI database of genetic variation. *Nucleic Acids Res* 2000;29:308-11.

10. McKenna A, Hanna M, Banks E, et al. The Genome Analysis Toolkit: a MapReduce framework for analyzing next-generation DNA sequencing data. *Genome Res* 2010;20:1297-303.
11. Koboldt DC, Zhang Q, Larson DE, et al. VarScan 2: somatic mutation and copy number alteration discovery in cancer by exome sequencing. *Genome Res* 2012;22:568-76.
12. Fang H, Bergmann EA, Arora K, et al. Indel variant analysis of short-read sequencing data with Scalpel. *Nat Protoc* 2016;11:2529-2548.
13. Wang K, Li M, Hakonarson H. ANNOVAR: functional annotation of genetic variants from high-throughput sequencing data. *Nucleic Acids Res* 2010;38:e164.
14. Hart RK, Rico R, Hare E, et al. A Python package for parsing, validating, mapping and formatting sequence variants using HGVS nomenclature. *Bioinformatics* 2014;31:268-70.
15. Okonechnikov K, Conesa A, Garcia-Alcalde F. Qualimap 2: advanced multi-sample quality control for high-throughput sequencing data. *Bioinformatics* 2015;32:292-4.
16. Thorvaldsdottir H, Robinson JT, Mesirov JP. Integrative Genomics Viewer (IGV): high-performance genomics data visualization and exploration. *Brief Bioinform* 2012;14:178-92.
17. Li MM, Datto M, Duncavage EJ, et al. Standards and Guidelines for the Interpretation and Reporting of Sequence Variants in Cancer: A Joint Consensus Recommendation of the Association for Molecular Pathology, American Society of Clinical Oncology, and College of American Pathologists. *J Mol Diagn* 2017;19:4-23.
18. Auton A, Brooks LD, Durbin RM, et al. A global reference for human genetic variation. *Nature* 2015;526:68-74.

19. Lek M, Karczewski KJ, Minikel EV, et al. Analysis of protein-coding genetic variation in 60,706 humans. *Nature* 2016;536:285-91.
20. NHLBI Exome Sequencing Project (ESP) Exome Variant Server. Volume 2017.
21. Ng PC, Henikoff S. SIFT: Predicting amino acid changes that affect protein function. *Nucleic Acids Res* 2003;31:3812-4.
22. Adzhubei I, Jordan DM, Sunyaev SR. Predicting functional effect of human missense mutations using PolyPhen-2. *Curr Protoc Hum Genet* 2013;Chapter 7:Unit7.20.
23. Forbes SA, Beare D, Gunasekaran P, et al. COSMIC: exploring the world's knowledge of somatic mutations in human cancer. *Nucleic Acids Res* 2015;43:D805-11.
24. Landrum MJ, Lee JM, Riley GR, et al. ClinVar: public archive of relationships among sequence variation and human phenotype. *Nucleic Acids Res* 2014;42:D980-5.
25. Beroukhi R, Getz G, Nghiemphu L, et al. Assessing the significance of chromosomal aberrations in cancer: methodology and application to glioma. *Proc Natl Acad Sci U S A* 2007;104:20007-12.
26. Diskin SJ, Eck T, Greshock J, et al. STAC: A method for testing the significance of DNA copy number aberrations across multiple array-CGH experiments. *Genome Res* 2006;16:1149-58.
27. Talevich E, Shain AH, Botton T, et al. CNVkit: Genome-Wide Copy Number Detection and Visualization from Targeted DNA Sequencing. *PLoS Comput Biol* 2016;12:e1004873.
28. Cesare AJ, Heaphy CM, O'Sullivan RJ. Visualization of Telomere Integrity and Function In Vitro and In Vivo Using Immunofluorescence Techniques. *Curr Protoc Cytom* 2015;73:12 40 1-31.

29. Singhi AD, Krasinskas AM, Choudry HA, et al. The prognostic significance of BAP1, NF2, and CDKN2A in malignant peritoneal mesothelioma. *Mod Pathol* 2016;29:14-24.
30. Scarpa A, Chang DK, Nones K, et al. Whole-genome landscape of pancreatic neuroendocrine tumours. *Nature* 2017;543:65-71.

| Variant                  | Specimen ID   | Gene            | Variant Description                                                                                                                                   |
|--------------------------|---------------|-----------------|-------------------------------------------------------------------------------------------------------------------------------------------------------|
| 3:42264742:C:A           | MetaPanNET-10 | TRAK1           | TRAK1:NM_001042646:exon16:c.C2375A:p.S792Y                                                                                                            |
| 7:5607617:G:T            | MetaPanNET-5  | ZNF713          | ZNF713:NM_182633:exon7:c.G1250T:p.R417M                                                                                                               |
| 11:64572033:G:A          | MetaPanNET-2  | MEN1            | MEN1:NM_000244:exon10:c.C1621T:p.Q541A(x3bMEN1:NM_130799:exon10:c.C1606T:p.Q536A(x3bMEN1:NM_130800:exon10:c.C1621T:p.Q541A(x3bMEN1:NM_130801:e        |
| 7:112128997:A:G          | MetaPanNET-11 | LSMEM1          | LSMEM1:NM_001134468:exon4:c.A289G:p.R97G(x3bLSMEM1:NM_182597:exon4:c.A289G:p.R97G                                                                     |
| 1:247263695:T:C          | MetaPanNET-10 | SNF669          | SNF669:NM_001142572:exon4:c.A1118G:p.Q373R(x3bSNF669:NM_024804:exon4:c.A1376G:p.Q459R                                                                 |
| 1:36821030:C:T           | MetaPanNET-7  | STK40           | STK40:NM_001128254:exon5:c.G362A:p.R121H(x3bSTK40:NM_001282547:exon5:c.G347A:p.R116H(x3bSTK40:NM_032017:exon6:c.G347A:p.R116H                         |
| 12:57535234:C:T          | MetaPanNET-14 | LRP1            | LRP1:NM_002332:exon3:c.C2687T:p.R90C                                                                                                                  |
| 12:49165118:T:C          | MetaPanNET-7  | ADCV6           | ADCV6:NM_015270:exon18:c.A3026G:p.N1009S(x3bADCV6:NM_020983:exon18:c.A2867G:p.N956S                                                                   |
| 2:207509263:C:G          | MetaPanNET-6  | LOC200726       | LOC200726:NM_001102659:exon2:c.C303G:p.I101M                                                                                                          |
| 11:82892936:G:A          | MetaPanNET-5  | PCF11           | PCF11:NM_015885:exon13:c.G4208A:p.R140Q                                                                                                               |
| 1:171755039:G:A          | MetaPanNET-2  | METTL13         | METTL13:NM_001007239:exon3:c.G466A:p.E156K(x3bMETTL13:NM_014955:exon3:c.G676A:p.E226K(x3bMETTL13:NM_015935:exon3:c.G934A:p.E312K                      |
| 13:24895827:G:A          | MetaPanNET-4  | CIQTNF9         | CIQTNF9:NM_001301138:exon4:c.G923A:p.G308E(x3bCIQTNF9:NM_178540:exon4:c.G923A:p.G308E(x3bCIQTNF9:NM_001301137:exon5:c.G923A:p.G308E                   |
| 7:91793825:G:A           | MetaPanNET-17 | LRD01           | LRD01:NM_001161528:exon2:c.G692T:p.S231F                                                                                                              |
| 3:108072305:T:T          | MetaPanNET-20 | HHLA2           | HHLA2:NM_001282556:exon4:c.97delC:p.P33fs(x3bHHLA2:NM_001282557:exon4:c.97delC:p.P33fs(x3bHHLA2:NM_007072:exon4:c.97delC:p.P33fs(x3bHHLA2:NM_0012825  |
| 17:17164015:T:C          | MetaPanNET-11 | CLDN7           | CLDN7:NM_0011307:exon3:c.A419G:p.Y140C(x3bCLDN7:NM_001185022:exon4:c.A419G:p.Y140C                                                                    |
| 3:195508956:C:G          | MetaPanNET-12 | MUC4            | MUC4:NM_018406:exon2:c.G9495C:p.Q136H                                                                                                                 |
| 2:22570782:G:A           | MetaPanNET-16 | DOCK10          | DOCK10:NM_001290263:exon6:c.C592T:p.R198W(x3bDOCK10:NM_0014689:exon6:c.C610T:p.R204W                                                                  |
| 2:102029529:A:G          | MetaPanNET-4  | RFX8            | RFX8:NM_001145664:exon8:c.T566C:p.M189T                                                                                                               |
| 14:105417337:T:C         | MetaPanNET-11 | AHNAK2          | AHNAK2:NM_138420:exon7:c.A4451G:p.K1484R                                                                                                              |
| 18:48190800:A:T          | MetaPanNET-4  | MAPK4           | MAPK4:NM_001292040:exon2:c.A472T:p.S158C(x3bMAPK4:NM_002747:exon2:c.A472T:p.S158C                                                                     |
| 1:144621504:T:G          | MetaPanNET-5  | NBPFF(x3bNBPFF9 | UNKNOWN                                                                                                                                               |
| 1:89448812:T:C           | MetaPanNET-6  | RBMX11          | RBMX11:NM_019610:exon2:c.A698C:p.D233A(x3bRBMX11:NM_001162536:exon3:c.A698C:p.D233A                                                                   |
| 2:68270152:C:T           | MetaPanNET-2  | C15D            | C15D:NM_006333:exon5:c.G295A:p.E99K(x3bC15D:NM_173177:exon5:c.G295A:p.E99K(x3bC15D:NM_001190263:exon6:c.G295A:p.E99K(x3bC15D:NM_001190265:exon6:c.G29 |
| X:76888796:A:C           | MetaPanNET-2  | ATRX            | ATRX:NM_138270:exon18:c.T4919G:p.V1640G(x3bATRX:NM_000489:exon19:c.T5033G:p.V1678G                                                                    |
| 3:51452107:C:A           | MetaPanNET-9  | VPRBP           | VPRBP:NM_001171904:exon17:c.G3646T:p.G1216(x3bVPRBP:NM_014703:exon18:c.G3649T:p.G1217X                                                                |
| 3:13368913:C:A           | MetaPanNET-18 | NUP210          | NUP210:NM_024923:exon32:c.G4311T:p.K1437N                                                                                                             |
| 9:113233812:G:A          | MetaPanNET-2  | SVEP1           | SVEP1:NM_153366:exon16:c.C2830T:p.Q944X                                                                                                               |
| X:152954101:G:C:G        | MetaPanNET-12 | SLC6A8          | SLC6A8:NM_001142805:exon1:c.73delC:p.P25fs(x3bSLC6A8:NM_005629:exon1:c.73delC:p.P25fs                                                                 |
| 3:195505925:G:A          | MetaPanNET-5  | MUC4            | MUC4:NM_018406:exon2:c.C12526T:p.P4176S                                                                                                               |
| 4:17654521:T:A           | MetaPanNET-16 | FAM184B         | FAM184B:NM_015688:exon11:c.A1213T:p.E708V                                                                                                             |
| 16:4745139:CAG:A:C       | MetaPanNET-4  | NUDT16L1        | NUDT16L1:NM_032349:exon3:c.S96_598del:p.199_200del                                                                                                    |
| 2:233708795:C:T          | MetaPanNET-17 | GIGYF2          | GIGYF2:NM_001103148:exon23:c.C2911T:p.0971X(x3bGIGYF2:NM_001103146:exon24:c.C2929T:p.0977Y(x3bGIGYF2:NM_001103147:exon26:c.C2992T:p.Q998X(x3bGIGYF    |
| 12:117672547:C:T         | MetaPanNET-12 | NOS1            | NOS1:NM_001204213:exon20:c.G2050A:p.V684M(x3bNOS1:NM_001204214:exon20:c.G2050A:p.V684M(x3bNOS1:NM_000620:exon21:c.G3058A:p.V1020M(x3bNOS1:NM_         |
| 1:15694073:T:A           | MetaPanNET-7  | FHADI1          | FHADI1:NM_052929:exon24:c.T3203A:p.V1068E                                                                                                             |
| 6:42236400:C:A           | MetaPanNET-17 | TRERF1          | TRERF1:NM_001297573:exon5:c.G689T:p.G230V(x3bTRERF1:NM_001297574:exon5:c.G689T:p.G230V(x3bTRERF1:NM_033502:exon5:c.G689T:p.G230V                      |
| 8:17406211:A:C           | MetaPanNET-6  | SLC7A2          | SLC7A2:NM_001008539:exon4:c.A557C:p.E186A(x3bSLC7A2:NM_001164771:exon4:c.A677C:p.E226A(x3bSLC7A2:NM_003046:exon4:c.A677C:p.E226A                      |
| 1:18809211:G:A           | MetaPanNET-16 | KLHD7A          | KLHD7A:NM_152375:exon1:c.G1736A:p.R579Q                                                                                                               |
| 19:22464579:G:A          | MetaPanNET-17 | ZNF729          | ZNF729:NM_001242680:exon4:c.G260A:p.R87H                                                                                                              |
| 6:52357123:G:A           | MetaPanNET-14 | EFHC1           | EFHC1:NM_018100:exon11:c.G1907A:p.R636H(x3bEFHC1:NM_001172420:exon12:c.G1850A:p.R617H                                                                 |
| 20:1456828:C:A           | MetaPanNET-5  | SIRPB2          | SIRPB2:NM_001122962:exon5:c.G1013T:p.S338I(x3bSIRPB2:NM_001134836:exon5:c.G719T:p.S240I                                                               |
| 11:130319024:ACCTCATTT:A | MetaPanNET-17 | ADAMTS15        | ADAMTS15:NM_139055:exon1:c.157_163del:p.L53fs                                                                                                         |
| 9:12377490:C:A           | MetaPanNET-5  | C5              | C5:NM_001735:exon16:c.G2046T:p.K682N                                                                                                                  |
| 2:27361001:G:T           | MetaPanNET-14 | PRR30           | PRR30:NM_178553:exon3:c.C197A:p.S66Y                                                                                                                  |
| 12:40878420:T:C          | MetaPanNET-2  | MUC19           | UNKNOWN                                                                                                                                               |
| 11:8667371:G:A           | MetaPanNET-2  | TRIM66          | TRIM66:NM_014818:exon7:c.C586T:p.R196C                                                                                                                |
| 10:100154954:C:T         | MetaPanNET-12 | PYROXD2         | PYROXD2:NM_032709:exon8:c.G784A:p.G262R                                                                                                               |
| 11:46908042:C:T          | MetaPanNET-11 | LRP4            | LRP4:NM_002334:exon17:c.G2258A:p.R753H                                                                                                                |
| 2:179638340:A:T          | MetaPanNET-7  | TTN             | TTN:NM_003319:exon31:c.T7305A:p.N2435K(x3bTTN:NM_133432:exon31:c.T7305A:p.N2435K(x3bTTN:NM_133437:exon31:c.T7305A:p.N2435K(x3bTTN:NM_001256850:ex     |
| 2:220439932:G:T          | MetaPanNET-5  | INHHA           | INHHA:NM_002191:exon2:c.G785T:p.C262F                                                                                                                 |
| 1:47904838:G:GC          | MetaPanNET-2  | FOXD2           | FOXD2:NM_004474:exon1:c.1032dupC:p.G344fs                                                                                                             |
| 17:39036158:A:T          | MetaPanNET-11 | KRT20           | KRT20:NM_019010:exon5:c.T825A:p.N275K                                                                                                                 |
| 6:32489892:G:A           | MetaPanNET-2  | HLA-DRB5        | HLA-DRB5:NM_002125:exon2:c.C160T:p.R54W                                                                                                               |
| 20:383388:C:T            | MetaPanNET-1  | MAVS            | MAVS:NM_020746:exon3:c.C224T:p.A75V                                                                                                                   |
| 6:117592126:G:A          | MetaPanNET-2  | VGLL2           | VGLL2:NM_182645:exon3:c.G812A:p.G271D                                                                                                                 |
| 13:108518557:T:G         | MetaPanNET-15 | FAM155A         | FAM155A:NM_001080396:exon1:c.A388C:p.T130P                                                                                                            |
| 10:35426781:G:T          | MetaPanNET-5  | CREM            | CREM:NM_183011:exon1:c.G187T:p.R65(x3bCREM:NM_183012:exon1:c.G187T:p.R65(x3bCREM:NM_181571:exon2:c.G187T:p.R65(x3bCREM:NM_183013:exon2:c.G187T:p.R65  |
| 6:31911738:G:A           | MetaPanNET-14 | C2              | C2:NM_001178063:exon10:c.G1136A:p.R379Q(x3bC2:NM_001282457:exon10:c.G1040A:p.R347Q(x3bC2:NM_001145903:exon12:c.G1382A:p.R461Q(x3bC2:NM_000063:ex      |
| 11:1212792:C:T           | MetaPanNET-1  | MUC5AC          | UNKNOWN                                                                                                                                               |
| 6:160211648:T:G          | MetaPanNET-1  | MRP18           | MRP18:NM_0014161:exon1:c.T29G:p.L10W                                                                                                                  |
| 1:183189964:C:T          | MetaPanNET-15 | LAMC2           | LAMC2:NM_005562:exon5:c.C508T:p.R170X(x3bLAMC2:NM_018891:exon5:c.C508T:p.R170X                                                                        |
| X:24329914:G:C           | MetaPanNET-20 | SUPT20HL2       | SUPT20HL2:NM_001136233:exon1:c.C1519G:p.P507A                                                                                                         |
| 12:49722824:G:T          | MetaPanNET-16 | TROAP           | TROAP:NM_005480:exon9:c.G1006T:p.G336C                                                                                                                |
| 14:105206086:G:A         | MetaPanNET-5  | ADSSL1          | ADSSL1                                                                                                                                                |
| 15:32917403:C:G          | MetaPanNET-14 | ARHGAP11A       | ARHGAP11A:NM_001286479:exon5:c.C107G:p.A36G(x3bARHGAP11A:NM_014783:exon5:c.C674G:p.A225G(x3bARHGAP11A:NM_199357:exon5:c.C674G:p.A225G(x3bARHG         |
| 1:20272217:C:T           | MetaPanNET-9  | KDMSB           | KDMSB:NM_006518:exon12:c.G1557A:p.W519X                                                                                                               |
| 1:63119738:T:G           | MetaPanNET-5  | DOCK7           | DOCK7:NM_001271999:exon3:c.G237C:p.L79F(x3bDOCK7:NM_001272000:exon3:c.G237C:p.L79F(x3bDOCK7:NM_001272001:exon3:c.G237C:p.L79F(x3bDOCK7:NM_001272      |
| 6:32489882:T:A           | MetaPanNET-2  | HLA-DRB5        | HLA-DRB5:NM_002125:exon2:c.A170T:p.H57L                                                                                                               |
| 3:130873879:G:C          | MetaPanNET-5  | NKX11           | CCDC178:NM_001105528:exon16:c.G1678A:p.E560K(x3bCCDC178:NM_198995:exon17:c.G1678A:p.E560K                                                             |
| 18:30804879:C:T          | MetaPanNET-5  | CCDC178         | CCDC178:NM_001105528:exon16:c.G1678A:p.E560K(x3bCCDC178:NM_198995:exon17:c.G1678A:p.E560K                                                             |
| 3:184043280:C:A          | MetaPanNET-3  | EIF4G1          | EIF4G1:NM_004953:exon13:c.C2389A:p.P797T(x3bEIF4G1:NM_198242:exon16:c.C428A:p.P828T(x3bEIF4G1:NM_198244:exon17:c.C2713A:p.P905T(x3bEIF4G1:NM_18291    |
| 4:5733859:C:T            | MetaPanNET-4  | SRP72           | SRP72:NM_001267722:exon1:c.C58T:p.R20W(x3bSRP72:NM_006947:exon1:c.C58T:p.R20W                                                                         |
| 2:166618500:TTGTC:T      | MetaPanNET-9  | GALNT3          | GALNT3:NM_004482:exon4:c.749_752del:p.R250fs                                                                                                          |
| 11:65810753:C:T          | MetaPanNET-6  | GAL3S3T3        | GAL3S3T3:NM_033036:exon3:c.G521A:p.R174H                                                                                                              |
| 3:111312615:T:C          | MetaPanNET-4  | ZBED2           | ZBED2:NM_024508:exon2:c.A434G:p.Q145R                                                                                                                 |
| 6:87953192:G:A           | MetaPanNET-1  | ZNF292          | ZNF292                                                                                                                                                |
| 14:53010244:C:T          | MetaPanNET-17 | TXND16          | TXND16:NM_001160047:exon3:c.G32A:p.G11E(x3bTXND16:NM_0020784:exon3:c.G32A:p.G11E                                                                      |
| 11:64575139:A:C          | MetaPanNET-11 | MEN1            | MEN1:NM_000244:exon10:c.T683G:p.L228R(x3bMEN1:NM_130799:exon10:c.T683G:p.L228R(x3bMEN1:NM_130800:exon10:c.T683G:p.L228R(x3bMEN1:NM_130801:exon10:c.T  |
| 3:195510614:T:C          | MetaPanNET-10 | MUC4            | MUC4:NM_018406:exon2:c.A7837G:p.S2613G                                                                                                                |
| 5:179743775:C:T          | MetaPanNET-14 | GPPT2           | GPPT2:NM_005110:exon12:c.G1141A:p.A381T                                                                                                               |
| 7:100551130:G:A          | MetaPanNET-3  | MUC3A           | MUC3A:NM_005960:exon2:c.G1711A:p.G571S                                                                                                                |
| 3:195505886:C:G          | MetaPanNET-2  | MUC4            | MUC4:NM_018406:exon2:c.G12565C:p.D4189H                                                                                                               |
| 18:52265084:T:C          | MetaPanNET-11 | DYNAP           | DYNAP:NM_173629:exon3:c.T341C:p.V114A                                                                                                                 |
| 19:20229964:C:A          | MetaPanNET-16 | ZNF90           | ZNF90:NM_007138:exon4:c.C1601A:p.A534E                                                                                                                |
| 1:177899015:C:A          | MetaPanNET-9  | SEC16B          | SEC16B:NM_033127:exon26:c.G3161T:p.R1054L                                                                                                             |
| 6:55406939:C:A           | MetaPanNET-17 | HMGCL11         | HMGCL11                                                                                                                                               |
| 1:201180037:G:A          | MetaPanNET-18 | IGFN1           | IGFN1:NM_001164586:exon12:c.G6016A:p.E2006K                                                                                                           |
| 11:103018514:G:C         | MetaPanNET-17 | DYNC2H1         | DYNC2H1:NM_001080463:exon19:c.G2716C:p.D906H(x3bDYNC2H1:NM_001377:exon19:c.G2716C:p.D906H                                                             |
| 5:14007532:G:A           | MetaPanNET-17 | HARS2           | HARS2                                                                                                                                                 |
| 7:99794868:A:G           | MetaPanNET-13 | STAG3           | STAG3:NM_001282718:exon8:c.A857G:p.Y286C(x3bSTAG3:NM_001282716:exon10:c.A1031G:p.Y344C(x3bSTAG3:NM_001282717:exon10:c.A1031G:p.Y344C(x3bSTAG3:NM      |
| 19:9008269:C:T           | MetaPanNET-7  | MUC16           | MUC16:NM_024690:exon41:c.G39283A:p.D1309S                                                                                                             |
| 3:48040176:T:A           | MetaPanNET-14 | MAP4            | MAP4:NM_001134364:exon2:c.A175T:p.N59Y(x3bMAP4:NM_002375:exon2:c.A175T:p.N59Y(x3bMAP4:NM_030885:exon2:c.A175T:p.N59Y                                  |
| 1:84385413:C:T           | MetaPanNET-7  | TTL7            | TTL7:NM_024688:exon13:c.G1469A:p.R490Q                                                                                                                |
| 1:93565066:G:T           | MetaPanNET-17 | CNN3            | CNN3:NM_001286055:exon5:c.C371A:p.T124N(x3bCNN3:NM_001286056:exon6:c.C386A:p.T129N(x3bCNN3:NM_001839:exon6:c.C509A:p.T170N                            |
| 3:142422729:C:T          | MetaPanNET-8  | PLS1            | PLS1:NM_001145319:exon13:c.C1391T:p.A464V(x3bPLS1:NM_001172312:exon13:c.C1391T:p.A464V(x3bPLS1:NM_002670:exon13:c.C1391T:p.A464V                      |
| 3:183824430:C:T          | MetaPanNET-4  | HTR3E           | HTR3E:NM_001256614:exon7:c.C1298T:p.T433I(x3bHTR3E:NM_198314:exon7:c.C1220T:p.T407I(x3bHTR3E:NM_182589:exon8:c.C1265T:p.T422I(x3bHTR3E:NM_198313:ex   |
| 13:33332229:C:G          | MetaPanNET-10 | PDS5B           | PDS5B:NM_015032:exon27:c.C3061G:p.L1021V                                                                                                              |
| 7:144095518:G:A          | MetaPanNET-16 | NOBOX           | NOBOX:NM_001080413:exon9:c.C1631T:p.S544F                                                                                                             |
| 14:69791499:A:AGTGAAGAG  | MetaPanNET-13 | GALNT16         | GALNT16:NM_001168368:exon3:c.A26_427insGTGAAGAG:p.T142fs(x3bGALNT16:NM_020692:exon3:c.A26_427insGTGAAGAG:p.T142fs                                     |
| 7:143929686:A:T          | MetaPanNET-17 | OR2A1(x3bOR2A42 | OR2A2:NM_001001802:exon1:c.T251A:p.L84H(x3bOR2A1:NM_001005287:exon1:c.T251A:p.L84H                                                                    |
| 6:6451919:G:T            | MetaPanNET-5  | VCX3A           | VCX3A:NM_016379:exon3:c.C428A:p.P143Q                                                                                                                 |
| 16:2114357:C:T           | MetaPanNET-4  | TSC2            | TSC2:NM_000548:exon15:c.C1528T:p.Q510X(x3bTSC2:NM_001077183:exon15:c.C1528T:p.Q510X(x3bTSC2:NM_00114382:exon15:c.C1528T:p.Q510X                       |
| 6:69728393:T:A           | MetaPanNET-4  | ADGRB3          | ADGRB3                                                                                                                                                |
| 16:50711373:C:A          | MetaPanNET-17 | SNX20           | SNX20:NM_001144972:exon2:c.G65T:p.R22M(x3bSNX20:NM_153337:exon2:c.G65T:p.R22M(x3bSNX20:NM_182854:exon2:c.G65T:p.R22M                                  |
| 10:70644274:G:T          | MetaPanNET-5  | STOX1           | STOX1:NM_001130161:exon3:c.G722T:p.C241F(x3bSTOX1:NM_152709:exon3:c.G722T:p.C241F                                                                     |
| 12:91449301:C:A          | MetaPanNET-17 | KERA            | KERA:NM_007035:exon2:c.G758T:p.G253V                                                                                                                  |
| 10:99258106:AGGCCG:C:A   | MetaPanNET-2  | MMS19           | MMS19:NM_001289403:exon1:c.31_35del:p.A11fs(x3bMMS19:NM_022362:exon1:c.31_35del:p.A11fs(x3bMMS19:NM_001289405:exon2:c.31_35del:p.A11fs                |
| 3:195506482:G:T          | MetaPanNET-5  | KIZ             | UNKNOWN                                                                                                                                               |
| 3:10183738:G:C:G         | MetaPanNET-15 | MUC4            | MUC4:NM_018406:exon2:c.C11969A:p.T3990N                                                                                                               |
| 3:195506434:G:A          | MetaPanNET-15 | VHL             | VHL:NM_000551:exon1:c.C208delG:p.E70fs(x3bVHL:NM_198156:exon1:c.C208delG:p.E70fs                                                                      |
| 6:168376881:T:G          | MetaPanNET-1  | MUC4            | MUC4:NM_018406:exon2:c.C12017T:p.T4006I                                                                                                               |
| 2:43903409:A:G           | MetaPanNET-2  | HGC6.3          | HGC6.3:NM_001129895:exon1:c.A452C:p.Q151P                                                                                                             |
| 5:15056034:C:T           | MetaPanNET-10 | LOC728819       | LOC728819:NM_001101330:exon1:c.T53C:p.I18T                                                                                                            |
| 6:151671826:C:T          | MetaPanNET-6  | ANXA6           | ANXA6:NM_001193544:exon13:c.G889A:p.G297S(x3BANXA6:NM_001155:exon14:c.G985A:p.G329S                                                                   |
| 1:68912508:G:A           | MetaPanNET-16 | AKAP12          | AKAP12:NM_144497:exon2:c.C2006T:p.T669M(x3bAKAP12:NM_005100:exon4:c.C2300T:p.T767M                                                                    |
| 10:24874446:G:A          | MetaPanNET-2  | RPE65           | RPE65:NM_000329:exon3:c.C130T:p.R44X                                                                                                                  |
|                          | MetaPanNET-5  | ARHGAP21        | ARHGAP21:NM_020824:exon26:c.A4722T:p.S1591L                                                                                                           |









19:45565422.C:T MetaPanNET-7 CLASRP CLASRP.NM\_001278439:exon10:c.C6887:p.R230X\3bCLASRP.NM\_007056:exon11:c.C8747:p.R292X  
1:248458876.T:C MetaPanNET-12 OR21T2 OR21T2.NM\_001004692:exon11:c.A5G;p.E2G  
10:95079758.GC:G MetaPanNET-20 MYOF MYOF.NM\_133337:exon48:c.5429delG;p.G1810fs\3bMYOF.NM\_013451:exon49:c.5468delG;p.G1823fs  
13:95839003.G:T MetaPanNET-10 ABCC4 ABCC4.NM\_001301830:exon10:c.C1272A;p.Y424X\3bABCC4.NM\_001105515:exon11:c.C1497A;p.Y499X\3bABCC4.NM\_001301829:exon11:c.C1497A;p.Y499X\3bABCC4.N  
17:40280352.G:A MetaPanNET-2 RAB5C RAB5C.NM\_004583:exon4:c.C368T;p.A123V\3bRAB5C.NM\_001252039:exon5:c.C4677;p.A156V\3bRAB5C.NM\_201434:exon5:c.C368T;p.A123V  
2:86434409.A:T MetaPanNET-16 MRPL35 MRPL35.NM\_016622:exon3:c.A3377;p.R113V\3bMRPL35.NM\_145644:exon3:c.A3377;p.R113V  
MetaPanNET-5 EVLP EVLP.NM\_001988:exon17:c.G2058T;p.Q686H  
3:197726165.A:G MetaPanNET-14 LMLN LMLN.NM\_001136049:exon11:c.A1184G;p.Q395R\3bLMLN.NM\_033029:exon11:c.A1184G;p.Q395R  
19:794697.C:G MetaPanNET-20 MAP2K7 MAP2K7.NM\_0219755:exon2:c.C182G;p.S61C\3bMAP2K7.NM\_145185:exon2:c.C182G;p.S61C\3bMAP2K7.NM\_001297555:exon3:c.C2309:p.S77C  
3:13467084.G:A MetaPanNET-14 EPFB1 EPFB1.NM\_000441:exon3:c.G755A;p.R252Q  
16:84346700.C:G MetaPanNET-6 WFDC1 WFDC1.NM\_001282466:exon2:c.G278C;p.R93P\3bWFDC1.NM\_001282467:exon2:c.G278C;p.R93P\3bWFDC1.NM\_021197:exon2:c.G278C;p.R93P  
9:13095165.A:G MetaPanNET-7 CIZ1 CIZ1.NM\_001257976:exon3:c.T32C;p.L11P\3bCIZ1.NM\_001131015:exon4:c.T335C;p.L112P\3bCIZ1.NM\_001131016:exon4:c.T335C;p.L112P\3bCIZ1.NM\_001131017:exon  
3:191888300.T:C MetaPanNET-12 FGF12 FGF12.NM\_021032:exon4:c.A560G;p.N187S\3bFGF12.NM\_004113:exon5:c.A374G;p.N125S  
12:40897325.T:C MetaPanNET-9 MUC19 MUC19  
20:35390932.T:A MetaPanNET-11 DSN1 DSN1.NM\_001145317:exon5:c.A201T;p.E67D\3bDSN1.NM\_001145318:exon5:c.A474T;p.E158D\3bDSN1.NM\_001145319:exon6:c.A522T;p.E174D\3bDSN1.NM\_00114531  
6:33288213.G:A MetaPanNET-4 DAXX DAXX.NM\_001254717:exon3:c.C970T;p.Q324X\3bDAXX.NM\_001141969:exon4:c.C1195T;p.Q399X\3bDAXX.NM\_001141970:exon4:c.C1231T;p.Q411X\3bDAXX.NM\_0013  
8:52320716.G:T MetaPanNET-5 PXDNL PXDNL.NM\_144651:exon17:c.C3468A;p.F1156L  
1:109860574.C:T MetaPanNET-17 SORT1 SORT1.NM\_001205228:exon16:c.G1631A;p.R544H\3bSORT1.NM\_002959:exon16:c.G2042A;p.R681H  
16:15501896.G:A MetaPanNET-11 MPV17L MPV17L.NM\_001128423:exon4:c.G518A;p.G173D  
11:797701.C:T MetaPanNET-15 PANO1 PANO1.NM\_001293167:exon11:c.C76T;p.L26F  
5:140503232.T:G MetaPanNET-18 PCDBH4 PCDBH4.NM\_0018938:exon11:c.T1652G;p.L551R  
13:25670797.C:G MetaPanNET-6 PABPC3 PABPC3.NM\_0030979:exon11:c.C461G;p.A154G  
6:154743710.C:T MetaPanNET-15 CNKSR3 CNKSR3.NM\_173515:exon9:c.G875A;p.R292H  
1:110740127.T:C:T MetaPanNET-14 SLC6A17 SLC6A17.NM\_001010898:exon11:c.1722delC;p.F574fs  
8:131149247.C:T MetaPanNET-6 ASAP1 ASAP1.NM\_018482:exon14:c.G1118A;p.C373Y\3bASAP1.NM\_001247996:exon15:c.G1097A;p.C366Y  
6:155450721.G:A MetaPanNET-5 TIAM2 TIAM2.NM\_0012454:exon3:c.G364A;p.E122K  
6:35773651.C:A MetaPanNET-2 LHFPL5 LHFPL5.NM\_182548:exon11:c.C204A;p.C68X  
2:10095207.G:A MetaPanNET-16 GRHL1 GRHL1.NM\_198182:exon2:c.G184A;p.G62S  
6:29911928.C:G MetaPanNET-12 HLA-A HLA-A.NM\_001242758:exon4:c.C649G;p.P217A\3bHLA-A.NM\_002116:exon4:c.C649G;p.P217A  
20:61050103.A:T MetaPanNET-17 GATAS GATAS.NM\_080473:exon2:c.T475A;p.F159I  
10:71684726.G:A MetaPanNET-4 COL13A1 COL13A1.NM\_008005:exon21:c.G1106A;p.R369H\3bCOL13A1.NM\_080800:exon21:c.G1106A;p.R369H\3bCOL13A1.NM\_080800:exon21:c.G1106A;p.R369H\3bCOL13A1.N  
1:247655327.G:T MetaPanNET-18 OR2W5 OR2W5.NM\_001004698:exon11:c.G898T;p.D300Y  
1:248525639.A:T MetaPanNET-6 OR2T4 OR2T4.NM\_001004696:exon11:c.A7577;p.L253F  
3:195510182.C:T MetaPanNET-7 MUC4 MUC4.NM\_018406:exon2:c.G8269A;p.D2757N  
12:11506264.C:G MetaPanNET-8 PRB1 PRB1.NM\_199353:exon4:c.G374C;p.G125A\3bPRB1.NM\_199354:exon4:c.G314C;p.G105A  
11:1212966.C:A MetaPanNET-1 MUC5AC MUC5AC  
7:104753293.C:T MetaPanNET-5 KMT2E KMT2E.NM\_018682:exon2:c.C5090T;p.S1697F\3bKMT2E.NM\_182931:exon27:c.C5090T;p.S1697F  
10:120828968.C:T MetaPanNET-2 EIF3A EIF3A.NM\_003750:exon6:c.G940A;p.E314K  
6:29911931.A:G MetaPanNET-12 HLA-A HLA-A.NM\_001242758:exon4:c.A652G;p.I218V\3bHLA-A.NM\_002116:exon4:c.A652G;p.I218V  
18:2771569.C:T MetaPanNET-11 SMCHD1 SMCHD1.NM\_015295:exon4:c.C5005T;p.R1669X  
17:8926124.C:T MetaPanNET-13 NTN1 NTN1.NM\_004822:exon2:c.C434T;p.T145I  
11:46456487.G:T MetaPanNET-18 AMBRA1 AMBRA1.NM\_001300731:exon12:c.C2553A;p.S851R\3bAMBRA1.NM\_001267783:exon13:c.C2376A;p.S792R\3bAMBRA1.NM\_017749:exon14:c.C2463A;p.S821R\3bAMBR  
1:205056819.G:A MetaPanNET-9 RBP85 RBP85.NM\_001193272:exon12:c.C1387T;p.P463S\3bRBP85.NM\_001193273:exon12:c.C1006T;p.P336S\3bRBP85.NM\_005057:exon12:c.C1387T;p.P463S  
16:28989327.T:C MetaPanNET-4 SPNS1 SPNS1.NM\_001142449:exon2:c.T340C;p.S114P\3bSPNS1.NM\_001142451:exon3:c.T406C;p.S136P\3bSPNS1.NM\_032038:exon3:c.T406C;p.S136P\3bSPNS1.NM\_00114244  
1:204511951.C:T MetaPanNET-16 MDM4 MDM4.NM\_001204171:exon8:c.C551T;p.S184F\3bMDM4.NM\_002939:exon8:c.C551T;p.S184F  
18:3253408.G:A MetaPanNET-5 MYL12A MYL12A.NM\_001303048:exon2:c.G163A;p.D55M\3bMYL12A.NM\_001303049:exon2:c.G181A;p.D61N\3bMYL12A.NM\_006471:exon2:c.G163A;p.D55M\3bMYL12A.NM\_00  
2:220107975.G:T MetaPanNET-1 GLB1L1 GLB1L1.NM\_001286427:exon2:c.C134A;p.P450\3bGLB1L1.NM\_001286423:exon3:c.C134A;p.P450\3bGLB1L1.NM\_024506:exon3:c.C134A;p.P450  
14:21560642.G:A MetaPanNET-5 ZNF219 ZNF219.NM\_001101672:exon3:c.C814T;p.P272S\3bZNF219.NM\_001102454:exon3:c.C814T;p.P272S\3bZNF219.NM\_016423:exon3:c.C814T;p.P272S  
3:174815077.T:A MetaPanNET-20 NALALD12 NALALD12.NM\_207015:exon2:c.T541A;p.F181I  
7:6889133.C:T MetaPanNET-10 ATRX ATRX.NM\_138270:exon17:c.G4763A;p.C1588Y\3bATRX.NM\_000489:exon18:c.G4877A;p.C1626Y  
3:195508548.C:G MetaPanNET-4 MUC4 MUC4.NM\_018406:exon2:c.G9903C;p.E3301D  
7:76918958.A:T MetaPanNET-11 ATRX ATRX.NM\_138270:exon11:c.3918delA;p.K1306fs\3bATRX.NM\_000489:exon12:c.4032delA;p.K1344fs  
16:2131647.C:G MetaPanNET-2 TSC2 TSC2.NM\_001077183:exon30:c.C3530G;p.S1177V\3bTSC2.NM\_000548:exon31:c.C3662G;p.S1221W\3bTSC2.NM\_00114382:exon31:c.C3662G;p.S1221W  
17:41477501.C:G MetaPanNET-1 ARL4D ARL4D.NM\_001661:exon2:c.C401G;p.A134G  
11:46903429.C:T MetaPanNET-17 LRP4 LRP4.NM\_002334:exon20:c.G2638A;p.A880T  
2:133540288.T:A MetaPanNET-2 NCKAP5 NCKAP5.NM\_207363:exon14:c.A4096T;p.S1366C  
21:45165993.G:A MetaPanNET-17 PDXK PDXK.NM\_003681:exon5:c.G365A;p.G122D  
3:5315559.C:A MetaPanNET-7 RFT1 RFT1.NM\_052859:exon4:c.G2877;p.W96L  
12:29494741.G:A MetaPanNET-16 ERGIC2 ERGIC2.NM\_016570:exon13:c.C997T;p.H333Y  
10:135020720.C:T MetaPanNET-9 KNDC1 KNDC1.NM\_152643:exon20:c.C3659T;p.T1220M  
1:15987738.G:T MetaPanNET-5 RSC1A1 RSC1A1.NM\_006511:exon11:c.G1375T;p.G459C  
12:56579985.A:G MetaPanNET-13 SMARCC2 SMARCC2.NM\_001130420:exon3:c.T271C;p.C91R\3bSMARCC2.NM\_003075:exon3:c.T271C;p.C91R\3bSMARCC2.NM\_139067:exon3:c.T271C;p.C91R  
13:43659911.T:A MetaPanNET-11 DNAI1 DNAI1.NM\_0013238:exon5:c.A379T;p.K127X  
8:196247.G:C MetaPanNET-13 ZNF596 ZNF596.NM\_001042415:exon6:c.G1400C;p.R467T\3bZNF596.NM\_001042416:exon6:c.G1400C;p.R467T\3bZNF596.NM\_001287254:exon6:c.G1400C;p.R467T\3bZNF596.N  
22:39909758.C:G MetaPanNET-11 MIEF1 MIEF1.NM\_001304564:exon6:c.C822G;p.I274M\3bMIEF1.NM\_019008:exon6:c.C822G;p.I274M  
7:4839014.G:A MetaPanNET-13 RADIL RADIL.NM\_018059:exon15:c.C3223T;p.L1075F  
19:10254467.T:C MetaPanNET-7 DNMT1 DNMT1.NM\_001379:exon28:c.A3043G;p.K015E\3bDNMT1.NM\_001130823:exon29:c.A3091G;p.K031E  
1:186008969.G:C MetaPanNET-11 HMCN1 HMCN1.NM\_031935:exon39:c.G6138C;p.L2046F  
3:47032902.G:A MetaPanNET-2 NBEAL2 NBEAL2.NM\_0015175:exon8:c.G649A;p.G217R  
16:30616673.G:A MetaPanNET-14 ZNF689 ZNF689.NM\_138447:exon3:c.C415T;p.R139X  
11:213159.C:A MetaPanNET-3 MUC5AC MUC5AC  
11:46786718.C:A MetaPanNET-5 CKAP5 CKAP5.NM\_001008938:exon28:c.G3500T;p.G1167V\3bCKAP5.NM\_014756:exon28:c.G3500T;p.G1167V  
4:95204305.G:A MetaPanNET-18 SMARCAD1 SMARCAD1.NM\_001254949:exon14:c.G1470A;p.M490\3bSMARCAD1.NM\_001128429:exon22:c.G2766A;p.M921\3bSMARCAD1.NM\_001128430:exon22:c.G2766A;p.M9  
19:56736055.T:C MetaPanNET-15 ZSCAN5A ZSCAN5A.NM\_024303:exon2:c.A361G;p.N121D  
4:79387478.G:C MetaPanNET-17 FRAS1 FRAS1.NM\_025074:exon50:c.G7146C;p.Q2382H  
12:40897323.C:T MetaPanNET-9 MUC19 MUC19  
15:43023149.C:T MetaPanNET-17 CDAN1 CDAN1.NM\_138477:exon13:c.G1981A;p.D661N  
20:20552231.C:A MetaPanNET-17 RALGAPA2 RALGAPA2.NM\_020343:exon23:c.G3027T;p.K1009N  
12:6601487.G:A MetaPanNET-15 MRPL51 MRPL51.NM\_016497:exon3:c.C3377;p.R113C  
2:172809497.A:G MetaPanNET-17 HAT1 HAT1.NM\_003642:exon4:c.A287G;p.D96G  
14:23548793.C:T MetaPanNET-6 ACIN1 ACIN1.NM\_001164815:exon5:c.G1805A;p.R602H\3bACIN1.NM\_001164814:exon6:c.G1925A;p.R642H\3bACIN1.NM\_014977:exon6:c.G1925A;p.R642H  
5:140563608.C:T MetaPanNET-5 PCDBH16 PCDBH16.NM\_020957:exon11:c.C1474T;p.P492S  
3:195506798.C:G MetaPanNET-4 MUC4 MUC4.NM\_018406:exon2:c.G11653C;p.D3885H  
16:31153157.C:T MetaPanNET-16 PRSS36 PRSS36.NM\_001258290:exon11:c.G1631A;p.W544X\3bPRSS36.NM\_001258291:exon11:c.G1646A;p.W549X\3bPRSS36.NM\_173502:exon11:c.G1646A;p.W549X  
3:18336898.C:T MetaPanNET-14 KHLH24 KHLH24.NM\_017644:exon3:c.C454T;p.R152C  
18:29054302.G:A MetaPanNET-5 DSG3 DSG3.NM\_001944:exon15:c.G2320A;p.G774R  
12:40884757.C:G MetaPanNET-12 MUC19 MUC19  
7:107638828.A:C MetaPanNET-18 LAMB1 LAMB1.NM\_002291:exon4:c.T323G;p.L108R  
6:7249073.C:T MetaPanNET-14 RREB1 RREB1.NM\_001003698:exon12:c.C4936T;p.Q1646X\3bRREB1.NM\_001003700:exon12:c.C4303T;p.Q1435X\3bRREB1.NM\_001168344:exon12:c.C4936T;p.Q1646X\3bRREB  
10:121652454.G:A MetaPanNET-11 SEC23IP SEC23IP.NM\_007190:exon11:c.G160A;p.G54R  
5:35591599.T:A MetaPanNET-17 HUWE1 HUWE1.NM\_00131407:exon5:c.A6965T;p.E2322V  
13:61985445.C:A MetaPanNET-17 PCDH20 PCDH20.NM\_002843:exon2:c.G2787T;p.Q929H  
14:23057888.C:A MetaPanNET-5 DAD1 DAD1.NM\_001344:exon11:c.G176T;p.G59V  
1:12776226.C:A MetaPanNET-6 DADA1 DADA1  
22:35480407.G:T MetaPanNET-16 ISX ISX.NM\_001008494:exon3:c.G413T;p.R138L\3bISX.NM\_001303508:exon4:c.G413T;p.R138L  
10:14939192.C:A MetaPanNET-4 SUV39H2 SUV39H2.NM\_0024670:exon2:c.C345A;p.Y115X\3bSUV39H2.NM\_001193424:exon3:c.C525A;p.Y175X\3bSUV39H2.NM\_001193425:exon3:c.C345A;p.Y115X  
11:76751604.T:C MetaPanNET-16 B3GN16 B3GN16  
19:12154817.G:T MetaPanNET-17 ZNF78 ZNF78.NM\_001080404:exon4:c.C1399A;p.R467S  
22:32100683.G:C MetaPanNET-6 PRR14L PRR14L.NM\_173566:exon5:c.C5786G;p.P1929R  
16:2136213.T:A MetaPanNET-11 TSC2 TSC2.NM\_001077183:exon35:c.T4481A;p.I4494N\3bTSC2.NM\_00114382:exon36:c.T4613A;p.I1538N\3bTSC2.NM\_000548:exon37:c.T4682A;p.I1561N  
19:1304987.C:T MetaPanNET-13 CALR CALR.NM\_00104343:exon2:c.C131T;p.S44L  
7:150820945.G:A MetaPanNET-14 AGAP3 AGAP3.NM\_001281300:exon9:c.G509A;p.G170E\3bAGAP3.NM\_0031946:exon9:c.G1193A;p.G398E  
10:120789386.A:C MetaPanNET-12 NANOS1 NANOS1.NM\_199461:exon11:c.A73C;p.S25R  
10:49658575.G:A MetaPanNET-5 ARHGAP22 ARHGAP22.NM\_001256026:exon7:c.C1327T;p.R443C\3bARHGAP22.NM\_001256024:exon9:c.C1645T;p.R54C\3bARHGAP22.NM\_001256025:exon9:c.C1615T;p.R53C\3b  
19:11568904.G:A MetaPanNET-8 ELAVL3 ELAVL3.NM\_001420:exon5:c.C685T;p.P229S\3bELAVL3.NM\_032281:exon5:c.C685T;p.P229S  
4:169282358.G:A MetaPanNET-14 DDH6L DDH6L.NM\_001012967:exon37:c.C4933T;p.R1645C  
9:3469113.G:T MetaPanNET-18 CCL19 CCL19.NM\_006274:exon11:c.C24A;p.S8R  
15:42185626.T:A MetaPanNET-13 SPTBN5 SPTBN5.NM\_0016642:exon2:c.A70T;p.T24S  
7:150761807.C:T MetaPanNET-20 SLCA42 SLCA42.NM\_001199693:exon3:c.C385T;p.R129W\3bSLCA42.NM\_001199694:exon3:c.C370T;p.R124W\3bSLCA42.NM\_001199692:exon4:c.C412T;p.R138W\3bSLCA42.NM  
6:109220989.G:C MetaPanNET-20 ARM2C ARM2C.NM\_001286609:exon6:c.G346C;p.E116Q\3bARM2C.NM\_032131:exon7:c.G841C;p.E281Q  
16:90015999.G:A MetaPanNET-5 DEF8 DEF8.NM\_207514:exon2:c.G126A;p.M42I  
3:195510085.C:T MetaPanNET-8 MUC4 MUC4.NM\_018406:exon2:c.G8366A;p.S2789N  
19:4796266.G:A MetaPanNET-9 SLC8A2 SLC8A2.NM\_015063:exon2:c.C395T;p.T132M  
12:42499692.A:T MetaPanNET-13 GXYL1 GXYL1.NM\_001099650:exon4:c.T699A;p.Y233X\3bGXYL1.NM\_173601:exon5:c.T792A;p.Y264X  
12:40898784.T:A MetaPanNET-3 MUC19 MUC19  
9:35381201.T:A MetaPanNET-17 UNC138 UNC138.NM\_006377:exon18:c.T2233A;p.C745S  
16:2905707.C:T MetaPanNET-17 PRSS22 PRSS22.NM\_022119:exon4:c.G427A;p.A143T

4:154256104:C.T MetaPanNET-10 TRIM2  
14:21869217:A.T MetaPanNET-7 CHD8  
3:52474071:C.T MetaPanNET-12 SEMA3G  
14:36154147:A.G MetaPanNET-17 RALGAPA1  
15:41862356:T.C MetaPanNET-17 TYRO3  
21:34038272:C.T MetaPanNET-16 SYN11  
2:165365347:A.G MetaPanNET-4 GRB14  
9:104171726:A.T MetaPanNET-9 ZNF189  
3:150911398:C.G MetaPanNET-12 MFD12L  
19:52658400:T.A MetaPanNET-12 ZNF836  
3:195507923:C.T MetaPanNET-4 MUC4  
1:2106193:T.A MetaPanNET-2 PRKCZ  
11:126294894:C.T MetaPanNET-4 KIRREL3  
2:17699580:A.G MetaPanNET-8 RAD51AP2  
7:143964428:A.G MetaPanNET-10 CTAGE4  
11:6190844:TTGTGCT MetaPanNET-17 OR52B2  
5:32379309:G.GCT MetaPanNET-5 ZFR  
6:138582742:TC.T MetaPanNET-16 ARFGEF3  
7:11457157:G.T MetaPanNET-14 THSD7A  
12:85500302:C.T MetaPanNET-16 LRR1Q1  
19:2853252:G.T MetaPanNET-5 ZNF555  
9:109689040:C.CA MetaPanNET-10 ZNF462  
17:56833482:G.GAACCCG MetaPanNET-7 PPM1E  
3:195509606:C.T MetaPanNET-10 MUC4  
11:125765493:G.T MetaPanNET-6 PUS3  
13:27827966:C.A MetaPanNET-5 RPL21  
10:93407:G.A MetaPanNET-8 TUBB8  
3:195510083:G.T MetaPanNET-8 MUC4  
19:3234316:C.T MetaPanNET-15 MAP3K7  
17:5036834:G.A MetaPanNET-9 USP6  
9:376291:T.C MetaPanNET-18 DOCK8  
3:195505772:C.G MetaPanNET-5 MUC4  
1:201179158:G.T MetaPanNET-6 IGFN1  
14:5906831:CTTAAAGC MetaPanNET-6 DAAM1  
18:12095271:C.T MetaPanNET-5 ANKRD62  
3:123135036:G.A MetaPanNET-2 ADY2C  
11:6629395:C.T MetaPanNET-9 ILK  
10:27054246:C.A MetaPanNET-14 AB11  
10:93505:C.T MetaPanNET-15 TUBB8  
3:195506459:C.T MetaPanNET-2 MUC4  
1:165634348:T.C MetaPanNET-14 ALDH9A1  
4:2709882:C.G MetaPanNET-14 FAM193A  
15:23686228:G.T MetaPanNET-3 GOLGA6L2  
12:100041953:A.G MetaPanNET-1 FAM71C  
2:99013339:G.A MetaPanNET-10 CNGA3  
14:54878232:T.G MetaPanNET-12 CDKN3  
3:48642106:CG.C MetaPanNET-3 UQCRC1  
9:96024997:G.T MetaPanNET-16 WNK2  
2:238289630:G.A MetaPanNET-5 COL6A3  
10:19292752:G.A MetaPanNET-16 DNMT1  
7:48004957:G.C MetaPanNET-16 HUS1  
X:108718983:C.T MetaPanNET-7 GUCY2F  
11:1218779:C.T MetaPanNET-4 MUC5AC  
1:173950017:G.A MetaPanNET-16 RCH31  
17:2940011:G.A MetaPanNET-11 PLSRC3  
14:47600972:C.A MetaPanNET-5 MDGA2  
17:35605537:C.T MetaPanNET-17 ACACA  
16:2528552:C.T MetaPanNET-17 ZKSCAN2  
11:34680236:A.G MetaPanNET-6 EHF  
19:49793395:A.T MetaPanNET-16 SLC6A16  
1:152128065:C.A MetaPanNET-7 RPTN  
11:10379792:C.G MetaPanNET-16 PDGFD  
20:47752369:C.A MetaPanNET-10 STAU1  
6:136913360:G.A MetaPanNET-9 MAP3K5  
16:15045631:G.A MetaPanNET-14 NP1A1  
14:92537368:T.GTGTGCTGCTGCTGCT MetaPanNET-8 ATXN3  
12:14659169:G.A MetaPanNET-17 PLBD1  
3:195506117:G.T MetaPanNET-14 MUC4  
1:16914275:C.A MetaPanNET-10 NBPF1  
17:5036843:C.A MetaPanNET-9 USP6  
X:76937667:A.T MetaPanNET-1 ATRX  
3:195507874:G.T MetaPanNET-4 MUC4  
19:22155878:G.A MetaPanNET-5 ZNF208  
3:195507854:G.C MetaPanNET-10 MUC4  
15:40565184:C.A MetaPanNET-13 PAK6  
16:2521333:C.T MetaPanNET-14 ZKSCAN2  
17:41004895:C.A MetaPanNET-6 AOC3  
6:789950:G.C MetaPanNET-5 TXNDC5  
6:46679342:G.A MetaPanNET-16 PLA2G7  
2:26800396:C.A MetaPanNET-5 C2orf70  
4:1374685:G.C MetaPanNET-5 UVSSA  
15:99500577:G.A MetaPanNET-6 IGF1R  
19:14561739:A.T MetaPanNET-7 PKN1  
17:1673228:C.T MetaPanNET-2 SERPINF1  
3:33114191:C.G MetaPanNET-6 GLB1  
15:32738694:G.A MetaPanNET-14 GOLGA80  
3:10188214:C.G MetaPanNET-15 VHL  
11:64802405:A.G MetaPanNET-18 SNX15  
12:42499654:G.T MetaPanNET-11 GXYLT1  
10:124351902:C.A MetaPanNET-9 DMBT1  
17:3385077:G.A MetaPanNET-3 ASPA  
17:18152713:T.C MetaPanNET-9 FLII  
18:28669505:G.T MetaPanNET-10 DSC2  
17:5036823:T.C MetaPanNET-9 USP6  
1:201179181:G.A MetaPanNET-4 IGFN1  
2:175287648:C.T MetaPanNET-2 SCRN3  
6:3383798:C.T MetaPanNET-1 PHF1  
15:45361101:G.C MetaPanNET-13 SORD  
2:97820410:A.T MetaPanNET-8 ANKRD36  
2:74300765:C.T MetaPanNET-5 TET3  
2:144903215:C.T MetaPanNET-13 GTDC1  
6:43029299:G.A MetaPanNET-11 KLC4  
1:248802016:G.A MetaPanNET-16 ORT235  
X:76918959:T.A MetaPanNET-11 ATRX  
22:32111265:G.A MetaPanNET-17 PRR14L  
1:41579027:C.T MetaPanNET-6 SCMH1  
3:56591281:G.GGTAAGCAAGG MetaPanNET-12 CDC66  
4:155460330:C.A MetaPanNET-4 PLRG1  
3:195511822:G.T MetaPanNET-10 MUC4  
10:77159051:G.C MetaPanNET-3 ZNF503  
1:202911314:C.T MetaPanNET-3 ADIPOR1  
19:42911401:C.T MetaPanNET-18 LPE  
15:5912965:C.A MetaPanNET-17 PRTG  
3:47284551:G.T MetaPanNET-15 VIP9  
15:62306142:A.T MetaPanNET-15 KIF51C  
3:195509182:G.T MetaPanNET-10 MUC4  
5:140720456:C.G MetaPanNET-20 PCDHGA2

14:31782251:C.A  
2:23633259:G.A  
14:94420789:C.A  
3:195508476:G.C  
3:194147849:CA.C  
3:195512690:G.C  
X:155169442:C.A  
20:33734701:TTGT.C.T  
18:11752923:G.T  
17:47895308:CT  
16:68324373:TA  
19:4512315:CT  
3:195506363:CT  
21:46924434:AC  
6:33287156:CA  
3:126740965:GA  
17:74160838:CG  
1:3416277:CA  
12:11373807:CT  
19:54080841:GA  
3:195509108:TA  
16:71483578:AG  
12:22062325:AT  
5:140482562:CT  
6:32609297:TG  
11:64572060:GA  
22:29885602:AC  
X:150349560:CT  
3:195511534:TA  
13:25479645:G.C  
11:64577422:TGACCGGTGGA.T  
1:17086088:G.C  
12:132834310:CA  
6:109282798:GA  
9:2081911:AG  
3:58090867:GT.G  
10:55996618:G.T  
17:74395806:TA  
3:195515052:G.C  
5:140789433:GT  
3:195508668:G.C  
19:11130283:GT  
7:100550510:AT  
3:184104310:CA  
20:36488419:G.T  
10:7614318:CA  
2:21472722:CT  
10:35928806:CA  
21:11058316:CT  
19:40541423:CTACAC  
4:6925490:GA  
6:86328541:AT  
11:30033412:CG  
2:152515622:GA  
X:1585081:CT  
22:38529021:CA  
1:234593420:CT  
11:85375244:TC  
6:168376927:G.C  
13:77818083:G.C  
7:101988845:CA  
6:36981534:GA  
11:72404474:GA  
X:230875:CG  
X:76778789:CTTCTTTTGTG.C  
2:212295786:CA  
3:183951501:CG  
11:64111357:CA  
17:78061517:CT  
19:11943243:CG  
16:1550157:CA  
1:45796870:GA  
12:53682047:GA  
2:26461999:CT  
3:4768820:CA  
12:12246114:GT  
16:52497943:GA  
15:48773869:CT  
12:30906324:CA  
6:152680550:GA  
16:68267908:CA  
18:19348598:CT  
11:173604925:CA  
12:46244018:AT  
3:77576567:TA  
6:78538672:CAG.C  
12:40882545:CT  
6:109771594:GA  
12:9312546:TTG.T  
10:35437325:AT  
12:50482334:CT  
19:46815764:CA  
22:18379121:AT  
4:79205558:G.C  
3:121200635:CT  
4:79455668:CT  
6:160211646:GTTG  
16:85953731:TA  
11:92087299:GT  
3:12512778:CT  
4:171009578:TA  
10:71018637:AG  
6:112671532:GA  
8:24157580:CA  
17:26684392:TC  
4:74853310:AG.A  
X:96167385:CT  
10:90767463:G.C  
2:27306220:GA  
1:190423810:AT  
6:136593131:AC  
X:10176292:CT  
20:58470634:CG  
9:140331068:GA  
11:124500714:CTGAT  
12:13715788:GA  
6:85446652:G.C

MetaPanNET-5 HEATR5A  
MetaPanNET-2 KCNJ13  
MetaPanNET-5 ASB2  
MetaPanNET-4 MUC4  
MetaPanNET-5 ATP13A3  
MetaPanNET-4 MUC4  
MetaPanNET-5 VAMP7  
MetaPanNET-8 EDEM2  
MetaPanNET-8 GNAL  
MetaPanNET-13 KA77  
MetaPanNET-16 SLC7A6  
MetaPanNET-2 PLIN4  
MetaPanNET-15 MUC4  
MetaPanNET-2 COL18A1  
MetaPanNET-8 DAXX  
MetaPanNET-4 PLXNA1  
MetaPanNET-14 RNF157  
MetaPanNET-11 MEGF6  
MetaPanNET-20 TPCN1  
MetaPanNET-5 ZNF331  
MetaPanNET-4 MUC4  
MetaPanNET-18 ZNF23  
MetaPanNET-1 ABCCC9  
MetaPanNET-5 PCDBH3  
MetaPanNET-16 HLA-DQA1  
MetaPanNET-3 MUC4  
MetaPanNET-13 NEFH  
MetaPanNET-4 GPR50  
MetaPanNET-5 MUC4  
MetaPanNET-17 CENP7  
MetaPanNET-5 MEN1  
MetaPanNET-6 MST1L  
MetaPanNET-17 GALNT9  
MetaPanNET-5 ARMCD  
MetaPanNET-12 SMARCA2  
MetaPanNET-6 FLNB  
MetaPanNET-17 PCDH15  
MetaPanNET-18 UBE2O  
MetaPanNET-12 MUC4  
MetaPanNET-5 PCDHGB6  
MetaPanNET-1 MUC4  
MetaPanNET-5 SMARCA4  
MetaPanNET-13 MUC3A  
MetaPanNET-8 CHRND  
MetaPanNET-5 CTNNB1  
MetaPanNET-2 ITH5  
MetaPanNET-11 SPAG16  
MetaPanNET-11 FZD8  
MetaPanNET-5 BAGE2\x3bBAGE3  
MetaPanNET-15 ZNF780B  
MetaPanNET-16 TBC1D104  
MetaPanNET-4 SYNCPR1  
MetaPanNET-17 KCNAA4  
MetaPanNET-3 NEB  
MetaPanNET-17 P2RY8  
MetaPanNET-5 PLA2G6  
MetaPanNET-2 TARBP1  
MetaPanNET-8 CREBZF  
MetaPanNET-13 HGC63  
MetaPanNET-4 MYCBP2  
MetaPanNET-12 SPDYE6  
MetaPanNET-3 FGD2  
MetaPanNET-16 ARAP1  
MetaPanNET-10 TRPP6  
MetaPanNET-7 ATPX  
MetaPanNET-2 ERBB4  
MetaPanNET-20 VVASB2  
MetaPanNET-3 CCDC88B  
MetaPanNET-11 CCDC40  
MetaPanNET-12 ZNF440  
MetaPanNET-5 TLO2  
MetaPanNET-5 MUTYH  
MetaPanNET-5 E SPL1  
MetaPanNET-16 HADHA  
MetaPanNET-5 ITPR1  
MetaPanNET-17 SETD1B  
MetaPanNET-5 FOX3  
MetaPanNET-5 TNB1  
MetaPanNET-12 CAPRN2  
MetaPanNET-18 SYNE1  
MetaPanNET-20 ESRP2  
MetaPanNET-1 MIB1  
MetaPanNET-2 LOC730159  
MetaPanNET-9 ARID2  
MetaPanNET-14 ROBO2  
MetaPanNET-1 MEI4  
MetaPanNET-15 MICAL19  
MetaPanNET-3 MICAL1  
MetaPanNET-16 PZP  
MetaPanNET-17 CREM  
MetaPanNET-16 SMARCD1  
MetaPanNET-5 CDCCR  
MetaPanNET-5 MICAL3  
MetaPanNET-13 FRAS1  
MetaPanNET-6 POLQ  
MetaPanNET-20 FRAS1  
MetaPanNET-1 MRPL18  
MetaPanNET-8 IRF8  
MetaPanNET-14 FAT3  
MetaPanNET-6 IQCB1  
MetaPanNET-3 AADAT  
MetaPanNET-16 HKDC1  
MetaPanNET-17 RFLP48  
MetaPanNET-14 ADAM28  
MetaPanNET-5 POLDIP2  
MetaPanNET-10 PPBP  
MetaPanNET-6 DIAPH2  
MetaPanNET-14 FAS  
MetaPanNET-15 EMILIN1  
MetaPanNET-15 BRINP3  
MetaPanNET-18 BCLAF1  
MetaPanNET-17 CLCN4  
MetaPanNET-11 SYCP2  
MetaPanNET-12 ENTPD8  
MetaPanNET-18 TBRG1  
MetaPanNET-8 GRIN2B  
MetaPanNET-9 TBX18

ACCEPTED MANUSCRIPT  
HEATR5A:NM\_015473:exon28:c.G4364T:p.R1455I  
KCNJ13:NM\_001172417:exon3:c.C485T:p.T162M\x3bKCNJ13:NM\_002242:exon3:c.C725T:p.T242M  
ASB2:NM\_016150:exon2:c.G208T:p.E70X\x3bASB2:NM\_001202429:exon4:c.G352T:p.E118X  
MUC4:NM\_018406:exon2:c.C9975G:p.H3325Q  
ATP13A3:NM\_024524:exon28:c.3079delT:p.W1027fs  
MUC4:NM\_018406:exon2:c.C5761G:p.L1921V  
VAMP7:NM\_001185183:exon6:c.C511A:p.H171N  
EDEM2:NM\_018217:exon2:c.142\_144del:p.48\_48del  
GNAL:NM\_182978:exon2:c.G448T:p.E150X\x3bGNAL:NM\_001142339:exon3:c.G217T:p.E73X\x3bGNAL:NM\_001261443:exon3:c.G217T:p.E73X  
KA77:NM\_001199158:exon6:c.C583T:p.R195X\x3bKA77:NM\_001199156:exon7:c.C673T:p.R225X\x3bKA77:NM\_001199157:exon7:c.C760T:p.R254X\x3bKA77:NM\_001199155  
SLC7A6:NM\_003983:exon5:c.T724A:p.S242T\x3bSLC7A6:NM\_001076785:exon6:c.T724A:p.S242T  
PLIN4:NM\_00180400:exon3:c.G1615A:p.G539S  
MUC4:NM\_018406:exon2:c.G12088A:p.A4030T  
.  
.  
PLXNA1:NM\_032242:exon21:c.G4076A:p.G1359E  
RNF157:NM\_052916:exon8:c.G711C:p.Q237H  
MEGF6:NM\_001409:exon23:c.G2840T:p.C947F  
TPCN1:NM\_001301214:exon25:c.C1978T:p.R660W\x3bTPCN1:NM\_017901:exon26:c.C2182T:p.R728W\x3bTPCN1:NM\_001143819:exon27:c.C2398T:p.R800W  
ZNF331:NM\_001253801:exon5:c.G1027A:p.V343I\x3bZNF331:NM\_001079906:exon6:c.G1027A:p.V343I\x3bZNF331:NM\_001079907:exon6:c.G1027A:p.V343I\x3bZNF331:NM\_001079908:exon6:c.G1027A:p.V343I\x3bZNF331:NM\_001079909:exon6:c.G1027A:p.V343I\x3bZNF331:NM\_001079910:exon6:c.G1027A:p.V343I\x3bZNF331:NM\_001079911:exon6:c.G1027A:p.V343I\x3bZNF331:NM\_001079912:exon6:c.G1027A:p.V343I\x3bZNF331:NM\_001079913:exon6:c.G1027A:p.V343I\x3bZNF331:NM\_001079914:exon6:c.G1027A:p.V343I\x3bZNF331:NM\_001079915:exon6:c.G1027A:p.V343I\x3bZNF331:NM\_001079916:exon6:c.G1027A:p.V343I\x3bZNF331:NM\_001079917:exon6:c.G1027A:p.V343I\x3bZNF331:NM\_001079918:exon6:c.G1027A:p.V343I\x3bZNF331:NM\_001079919:exon6:c.G1027A:p.V343I\x3bZNF331:NM\_001079920:exon6:c.G1027A:p.V343I\x3bZNF331:NM\_001079921:exon6:c.G1027A:p.V343I\x3bZNF331:NM\_001079922:exon6:c.G1027A:p.V343I\x3bZNF331:NM\_001079923:exon6:c.G1027A:p.V343I\x3bZNF331:NM\_001079924:exon6:c.G1027A:p.V343I\x3bZNF331:NM\_001079925:exon6:c.G1027A:p.V343I\x3bZNF331:NM\_001079926:exon6:c.G1027A:p.V343I\x3bZNF331:NM\_001079927:exon6:c.G1027A:p.V343I\x3bZNF331:NM\_001079928:exon6:c.G1027A:p.V343I\x3bZNF331:NM\_001079929:exon6:c.G1027A:p.V343I\x3bZNF331:NM\_001079930:exon6:c.G1027A:p.V343I\x3bZNF331:NM\_001079931:exon6:c.G1027A:p.V343I\x3bZNF331:NM\_001079932:exon6:c.G1027A:p.V343I\x3bZNF331:NM\_001079933:exon6:c.G1027A:p.V343I\x3bZNF331:NM\_001079934:exon6:c.G1027A:p.V343I\x3bZNF331:NM\_001079935:exon6:c.G1027A:p.V343I\x3bZNF331:NM\_001079936:exon6:c.G1027A:p.V343I\x3bZNF331:NM\_001079937:exon6:c.G1027A:p.V343I\x3bZNF331:NM\_001079938:exon6:c.G1027A:p.V343I\x3bZNF331:NM\_001079939:exon6:c.G1027A:p.V343I\x3bZNF331:NM\_001079940:exon6:c.G1027A:p.V343I\x3bZNF331:NM\_001079941:exon6:c.G1027A:p.V343I\x3bZNF331:NM\_001079942:exon6:c.G1027A:p.V343I\x3bZNF331:NM\_001079943:exon6:c.G1027A:p.V343I\x3bZNF331:NM\_001079944:exon6:c.G1027A:p.V343I\x3bZNF331:NM\_001079945:exon6:c.G1027A:p.V343I\x3bZNF331:NM\_001079946:exon6:c.G1027A:p.V343I\x3bZNF331:NM\_001079947:exon6:c.G1027A:p.V343I\x3bZNF331:NM\_001079948:exon6:c.G1027A:p.V343I\x3bZNF331:NM\_001079949:exon6:c.G1027A:p.V343I\x3bZNF331:NM\_001079950:exon6:c.G1027A:p.V343I\x3bZNF331:NM\_001079951:exon6:c.G1027A:p.V343I\x3bZNF331:NM\_001079952:exon6:c.G1027A:p.V343I\x3bZNF331:NM\_001079953:exon6:c.G1027A:p.V343I\x3bZNF331:NM\_001079954:exon6:c.G1027A:p.V343I\x3bZNF331:NM\_001079955:exon6:c.G1027A:p.V343I\x3bZNF331:NM\_001079956:exon6:c.G1027A:p.V343I\x3bZNF331:NM\_001079957:exon6:c.G1027A:p.V343I\x3bZNF331:NM\_001079958:exon6:c.G1027A:p.V343I\x3bZNF331:NM\_001079959:exon6:c.G1027A:p.V343I\x3bZNF331:NM\_001079960:exon6:c.G1027A:p.V343I\x3bZNF331:NM\_001079961:exon6:c.G1027A:p.V343I\x3bZNF331:NM\_001079962:exon6:c.G1027A:p.V343I\x3bZNF331:NM\_001079963:exon6:c.G1027A:p.V343I\x3bZNF331:NM\_001079964:exon6:c.G1027A:p.V343I\x3bZNF331:NM\_001079965:exon6:c.G1027A:p.V343I\x3bZNF331:NM\_001079966:exon6:c.G1027A:p.V343I\x3bZNF331:NM\_001079967:exon6:c.G1027A:p.V343I\x3bZNF331:NM\_001079968:exon6:c.G1027A:p.V343I\x3bZNF331:NM\_001079969:exon6:c.G1027A:p.V343I\x3bZNF331:NM\_001079970:exon6:c.G1027A:p.V343I\x3bZNF331:NM\_001079971:exon6:c.G1027A:p.V343I\x3bZNF331:NM\_001079972:exon6:c.G1027A:p.V343I\x3bZNF331:NM\_001079973:exon6:c.G1027A:p.V343I\x3bZNF331:NM\_001079974:exon6:c.G1027A:p.V343I\x3bZNF331:NM\_001079975:exon6:c.G1027A:p.V343I\x3bZNF331:NM\_001079976:exon6:c.G1027A:p.V343I\x3bZNF331:NM\_001079977:exon6:c.G1027A:p.V343I\x3bZNF331:NM\_001079978:exon6:c.G1027A:p.V343I\x3bZNF331:NM\_001079979:exon6:c.G1027A:p.V343I\x3bZNF331:NM\_001079980:exon6:c.G1027A:p.V343I\x3bZNF331:NM\_001079981:exon6:c.G1027A:p.V343I\x3bZNF331:NM\_001079982:exon6:c.G1027A:p.V343I\x3bZNF331:NM\_001079983:exon6:c.G1027A:p.V343I\x3bZNF331:NM\_001079984:exon6:c.G1027A:p.V343I\x3bZNF331:NM\_001079985:exon6:c.G1027A:p.V343I\x3bZNF331:NM\_001079986:exon6:c.G1027A:p.V343I\x3bZNF331:NM\_001079987:exon6:c.G1027A:p.V343I\x3bZNF331:NM\_001079988:exon6:c.G1027A:p.V343I\x3bZNF331:NM\_001079989:exon6:c.G1027A:p.V343I\x3bZNF331:NM\_001079990:exon6:c.G1027A:p.V343I\x3bZNF331:NM\_001079991:exon6:c.G1027A:p.V343I\x3bZNF331:NM\_001079992:exon6:c.G1027A:p.V343I\x3bZNF331:NM\_001079993:exon6:c.G1027A:p.V343I\x3bZNF331:NM\_001079994:exon6:c.G1027A:p.V343I\x3bZNF331:NM\_001079995:exon6:c.G1027A:p.V343I\x3bZNF331:NM\_001079996:exon6:c.G1027A:p.V343I\x3bZNF331:NM\_001079997:exon6:c.G1027A:p.V343I\x3bZNF331:NM\_001079998:exon6:c.G1027A:p.V343I\x3bZNF331:NM\_001079999:exon6:c.G1027A:p.V343I\x3bZNF331:NM\_001080000:exon6:c.G1027A:p.V343I\x3bZNF331:NM\_001080001:exon6:c.G1027A:p.V343I\x3bZNF331:NM\_001080002:exon6:c.G1027A:p.V343I\x3bZNF331:NM\_001080003:exon6:c.G1027A:p.V343I\x3bZNF331:NM\_001080004:exon6:c.G1027A:p.V343I\x3bZNF331:NM\_001080005:exon6:c.G1027A:p.V343I\x3bZNF331:NM\_001080006:exon6:c.G1027A:p.V343I\x3bZNF331:NM\_001080007:exon6:c.G1027A:p.V343I\x3bZNF331:NM\_001080008:exon6:c.G1027A:p.V343I\x3bZNF331:NM\_001080009:exon6:c.G1027A:p.V343I\x3bZNF331:NM\_001080010:exon6:c.G1027A:p.V343I\x3bZNF331:NM\_001080011:exon6:c.G1027A:p.V343I\x3bZNF331:NM\_001080012:exon6:c.G1027A:p.V343I\x3bZNF331:NM\_001080013:exon6:c.G1027A:p.V343I\x3bZNF331:NM\_001080014:exon6:c.G1027A:p.V343I\x3bZNF331:NM\_001080015:exon6:c.G1027A:p.V343I\x3bZNF331:NM\_001080016:exon6:c.G1027A:p.V343I\x3bZNF331:NM\_001080017:exon6:c.G1027A:p.V343I\x3bZNF331:NM\_001080018:exon6:c.G1027A:p.V343I\x3bZNF331:NM\_001080019:exon6:c.G1027A:p.V343I\x3bZNF331:NM\_001080020:exon6:c.G1027A:p.V343I\x3bZNF331:NM\_001080021:exon6:c.G1027A:p.V343I\x3bZNF331:NM\_001080022:exon6:c.G1027A:p.V343I\x3bZNF331:NM\_001080023:exon6:c.G1027A:p.V343I\x3bZNF331:NM\_001080024:exon6:c.G1027A:p.V343I\x3bZNF331:NM\_001080025:exon6:c.G1027A:p.V343I\x3bZNF331:NM\_001080026:exon6:c.G1027A:p.V343I\x3bZNF331:NM\_001080027:exon6:c.G1027A:p.V343I\x3bZNF331:NM\_001080028:exon6:c.G1027A:p.V343I\x3bZNF331:NM\_001080029:exon6:c.G1027A:p.V343I\x3bZNF331:NM\_001080030:exon6:c.G1027A:p.V343I\x3bZNF331:NM\_001080031:exon6:c.G1027A:p.V343I\x3bZNF331:NM\_001080032:exon6:c.G1027A:p.V343I\x3bZNF331:NM\_001080033:exon6:c.G1027A:p.V343I\x3bZNF331:NM\_001080034:exon6:c.G1027A:p.V343I\x3bZNF331:NM\_001080035:exon6:c.G1027A:p.V343I\x3bZNF331:NM\_001080036:exon6:c.G1027A:p.V343I\x3bZNF331:NM\_001080037:exon6:c.G1027A:p.V343I\x3bZNF331:NM\_001080038:exon6:c.G1027A:p.V343I\x3bZNF331:NM\_001080039:exon6:c.G1027A:p.V343I\x3bZNF331:NM\_001080040:exon6:c.G1027A:p.V343I\x3bZNF331:NM\_001080041:exon6:c.G1027A:p.V343I\x3bZNF331:NM\_001080042:exon6:c.G1027A:p.V343I\x3bZNF331:NM\_001080043:exon6:c.G1027A:p.V343I\x3bZNF331:NM\_001080044:exon6:c.G1027A:p.V343I\x3bZNF331:NM\_001080045:exon6:c.G1027A:p.V343I\x3bZNF331:NM\_001080046:exon6:c.G1027A:p.V343I\x3bZNF331:NM\_001080047:exon6:c.G1027A:p.V343I\x3bZNF331:NM\_001080048:exon6:c.G1027A:p.V343I\x3bZNF331:NM\_001080049:exon6:c.G1027A:p.V343I\x3bZNF331:NM\_001080050:exon6:c.G1027A:p.V343I\x3bZNF331:NM\_001080051:exon6:c.G1027A:p.V343I\x3bZNF331:NM\_001080052:exon6:c.G1027A:p.V343I\x3bZNF331:NM\_001080053:exon6:c.G1027A:p.V343I\x3bZNF331:NM\_001080054:exon6:c.G1027A:p.V343I\x3bZNF331:NM\_001080055:exon6:c.G1027A:p.V343I\x3bZNF331:NM\_001080056:exon6:c.G1027A:p.V343I\x3bZNF331:NM\_001080057:exon6:c.G1027A:p.V343I\x3bZNF331:NM\_001080058:exon6:c.G1027A:p.V343I\x3bZNF331:NM\_001080059:exon6:c.G1027A:p.V343I\x3bZNF331:NM\_001080060:exon6:c.G1027A:p.V343I\x3bZNF331:NM\_001080061:exon6:c.G1027A:p.V343I\x3bZNF331:NM\_001080062:exon6:c.G1027A:p.V343I\x3bZNF331:NM\_001080063:exon6:c.G1027A:p.V343I\x3bZNF331:NM\_001080064:exon6:c.G1027A:p.V343I\x3bZNF331:NM\_001080065:exon6:c.G1027A:p.V343I\x3bZNF331:NM\_001080066:exon6:c.G1027A:p.V343I\x3bZNF331:NM\_001080067:exon6:c.G1027A:p.V343I\x3bZNF331:NM\_001080068:exon6:c.G1027A:p.V343I\x3bZNF331:NM\_001080069:exon6:c.G1027A:p.V343I\x3bZNF331:NM\_001080070:exon6:c.G1027A:p.V343I\x3bZNF331:NM\_001080071:exon6:c.G1027A:p.V343I\x3bZNF331:NM\_001080072:exon6:c.G1027A:p.V343I\x3bZNF331:NM\_001080073:exon6:c.G1027A:p.V343I\x3bZNF331:NM\_001080074:exon6:c.G1027A:p.V343I\x3bZNF331:NM\_001080075:exon6:c.G1027A:p.V343I\x3bZNF331:NM\_001080076:exon6:c.G1027A:p.V343I\x3bZNF331:NM\_001080077:exon6:c.G1027A:p.V343I\x3bZNF331:NM\_001080078:exon6:c.G1027A:p.V343I\x3bZNF331:NM\_001080079:exon6:c.G1027A:p.V343I\x3bZNF331:NM\_001080080:exon6:c.G1027A:p.V343I\x3bZNF331:NM\_001080081:exon6:c.G1027A:p.V343I\x3bZNF331:NM\_001080082:exon6:c.G1027A:p.V343I\x3bZNF331:NM\_001080083:exon6:c.G1027A:p.V343I\x3bZNF331:NM\_001080084:exon6:c.G1027A:p.V343I\x3bZNF331:NM\_001080085:exon6:c.G1027A:p.V343I\x3bZNF331:NM\_001080086:exon6:c.G1027A:p.V343I\x3bZNF331:NM\_001080087:exon6:c.G1027A:p.V343I\x3bZNF331:NM\_001080088:exon6:c.G1027A:p.V343I\x3bZNF331:NM\_001080089:exon6:c.G1027A:p.V343I\x3bZNF331:NM\_001080090:exon6:c.G1027A:p.V343I\x3bZNF331:NM\_001080091:exon6:c.G1027A:p.V343I\x3bZNF331:NM\_001080092:exon6:c.G1027A:p.V343I\x3bZNF331:NM\_001080093:exon6:c.G1027A:p.V343I\x3bZNF331:NM\_001080094:exon6:c.G1027A:p.V343I\x3bZNF331:NM\_001080095:exon6:c.G1027A:p.V343I\x3bZNF331:NM\_001080096:exon6:c.G1027A:p.V343I\x3bZNF331:NM\_001080097:exon6:c.G1027A:p.V343I\x3bZNF331:NM\_001080098:exon6:c.G1027A:p.V343I\x3bZNF331:NM\_001080099:exon6:c.G1027A:p.V343I\x3bZNF331:NM\_001080100:exon6:c.G1027A:p.V343I\x3bZNF331:NM\_001080101:exon6:c.G1027A:p.V343I\x3bZNF331:NM\_001080102:exon6:c.G1027A:p.V343I\x3bZNF331:NM\_001080103:exon6:c.G1027A:p.V343I\x3bZNF331:NM\_001080104:exon6:c.G1027A:p.V343I\x3bZNF331:NM\_001080105:exon6:c.G1027A:p.V343I\x3bZNF331:NM\_001080106:exon6:c.G1027A:p.V343I\x3bZNF331:NM\_001080107:exon6:c.G1027A:p.V343I\x3bZNF331:NM\_001080108:exon6:c.G1027A:p.V343I\x3bZNF331:NM\_001080109:exon6:c.G1027A:p.V343I\x3bZNF331:NM\_001080110:exon6:c.G1027A:p.V343I\x3bZNF331:NM\_001080111:exon6:c.G1027A:p.V343I\x3bZNF331:NM\_001080112:exon6:c.G1027A:p.V343I\x3bZNF331:NM\_001080113:exon6:c.G1027A:p.V343I\x3bZNF331:NM\_001080114:exon6:c.G1027A:p.V343I\x3bZNF331:NM\_001080115:exon6:c.G1027A:p.V343I\x3bZNF331:NM\_001080116:exon6:c.G1027A:p.V343I\x3bZNF331:NM\_001080117:exon6:c.G1027A:p.V343I\x3bZNF331:NM\_001080118:exon6:c.G1027A:p.V343I\x3bZNF331:NM\_001080119:exon6:c.G1027A:p.V343I\x3bZNF331:NM\_001080120:exon6:c.G1027A:p.V343I\x3bZNF331:NM\_001080121:exon6:c.G1027A:p.V343I\x3bZNF331:NM\_001080122:exon6:c.G1027A:p.V343I\x3bZNF331:NM\_001080123:exon6:c.G1027A:p.V343I\x3bZNF331:NM\_001080124:exon6:c.G1027A:p.V343I\x3bZNF331:NM\_001080125:exon6:c.G1027A:p.V343I\x3bZNF331:NM\_001080126:exon6:c.G1027A:p.V343I\x3bZNF331:NM\_001080127:exon6:c.G1027A:p.V343I\x3bZNF331:NM\_001080128:exon6:c.G1027A:p.V343I\x3bZNF331:NM\_001080129:exon6:c.G1027A:p.V343I\x3bZNF331:NM\_001080130:exon6:c.G1



18:11689658:C:CG MetaPanNET-8 GNAL GNAL:NM\_182978:exon1:c.97dupG:p.P32fs  
 3:121351328:G:GGCTCAGGCTCAG MetaPanNET-7 HCL51 HCL51:NM\_001292041:exon11:c.979\_980insCTGACGCTCAGC:p.P327delinsPEPEPv3bHCL51:NM\_005335:exon12:c.1090\_1091insCTGAGCTGAGC:p.P364delinsPEPEP  
 3:47142949:C:A MetaPanNET-17 SETD2 SETD2:NM\_014159:exon8:c.G5014T:p.G1672X  
 3:112358744:C:G MetaPanNET-5 CCDC80 CCDC80:NM\_199511:exon2:c.G9C:p.W3Cv3bCCDC80:NM\_199512:exon2:c.G9C:p.W3C  
 19:45888874:C:A MetaPanNET-5 PPR1R3L PPR1R3L:NM\_001142502:exon11:c.G2194T:p.E732Xv3bPPR1R3L:NM\_006663:exon11:c.G2194T:p.E732X  
 19:9021161:C:T MetaPanNET-7 MUC16 MUC16:NM\_024690:exon19:c.G37162A:p.V12388I  
 9:37518180:T:C MetaPanNET-17 FBOY10 FBOY10:NM\_012166:exon9:c.A2456G:p.N819S  
 1:103352377:G:T MetaPanNET-7 COL11A1 COL11A1:NM\_080630:exon61:c.C4496A:p.P1499Hv3bCOL11A1:NM\_001190709:exon62:c.C4727A:p.P1576Hv3bCOL11A1:NM\_001854:exon63:c.C4844A:p.P1615Hv3bCOL  
 16:1272793:C:T MetaPanNET-17 TSPG1 TSPG1:NM\_012467:exon4:c.G370A:p.G124R  
 1:67889976:AT:A MetaPanNET-14 SERBP1 SERBP1:NM\_001018067:exon5:c.724delA:p.124fsv3bSERBP1:NM\_001018068:exon5:c.706delA:p.1236fs  
 3:164905688:G:C MetaPanNET-6 SLTRK3 SLTRK3:NM\_014926:exon2:c.C2931G:p.F977L  
 19:55174472:T:C MetaPanNET-13 LILRB4 LILRB4:NM\_001278429:exon1:c.T110C:p.L37P  
 5:126676229:T:G MetaPanNET-11 MEGF10 MEGF10:NM\_001256545:exon4:c.T226G:p.Y76Dv3bMEGF10:NM\_032446:exon5:c.T226G:p.Y76D  
 20:60897149:C:T MetaPanNET-6 LAMA5 LAMA5:NM\_005560:exon48:c.G6422A:p.R2141H  
 2:97818241:T:G MetaPanNET-13 ANKRD36 ANKRD36:NM\_001164315:exon14:c.T1163G:p.V388G  
 12:121175264:G:A MetaPanNET-15 ACADS ACADS:NM\_000017:exon4:c.G466A:p.E156Kv3bACADS:NM\_001302554:exon4:c.G466A:p.E156K  
 13:113201818:G:GTCCGTGGGAAAGACG MetaPanNET-12 TUBGCP3 TUBGCP3:NM\_001286279:exon10:c.L283\_1284insCGTCTCCACACGCA:p.R428delinsRVFPFH  
 1:173949981:G:C MetaPanNET-11 RCH31 RCH31:NM\_001300850:exon5:c.C935G:p.S312Cv3bRCH31:NM\_001300851:exon5:c.C935G:p.S312Cv3bRCH31:NM\_001300852:exon5:c.C935G:p.S312Cv3bRCH31:NM\_172  
 4:186065977:T:G MetaPanNET-17 SLC25A4 SLC25A4:NM\_001151:exon2:c.T171G:p.C57W  
 7:93516654:C:A MetaPanNET-10 TFPF2 TFPF2:NM\_001271003:exon4:c.G517T:p.D173Yv3bTFPF2:NM\_006528:exon4:c.G550T:p.D184Y  
 16:22086950:T:G MetaPanNET-17 C1orf52 C1orf52:NM\_001164579:exon2:c.T249G:p.C83W  
 8:145639801:G:T MetaPanNET-5 SLC39A4 SLC39A4:NM\_017767:exon5:c.C919A:p.L307Mv3bSLC39A4:NM\_130849:exon6:c.C994A:p.L332M  
 20:36776488:C:A MetaPanNET-5 TGM2 TGM2:NM\_004613:exon5:c.G556T:p.E186Xv3bTGM2:NM\_198951:exon5:c.G556T:p.E186X  
 3:195059717:G:T MetaPanNET-12 MUC4 MUC4:NM\_018406:exon2:c.C8734A:p.P2912T  
 15:23685913:G:C MetaPanNET-7 GOLGA6L2 GOLGA6L2:NM\_001304388:exon8:c.C1709G:p.A570G  
 1:200881035:C:T MetaPanNET-20 C1orf106 C1orf106:NM\_001442569:exon9:c.C1414T:p.R472Cv3bC1orf106:NM\_018265:exon9:c.C1711T:p.R571C  
 13:46629986:T:G MetaPanNET-10 CPB2  
 12:56092630:C:T MetaPanNET-11 ITGA7 ITGA7:NM\_001144996:exon6:c.G874A:p.A292Tv3bITGA7:NM\_001144997:exon6:c.G583A:p.A195Tv3bITGA7:NM\_002206:exon6:c.G862A:p.A288T  
 18:30804860:C:T MetaPanNET-18 CCDC178 CCDC178:NM\_001105528:exon16:c.G1697A:p.R566Qv3bCCDC178:NM\_198995:exon17:c.G1697A:p.R566Q  
 7:129393153:A:G MetaPanNET-9 CPA4 CPA4:NM\_001163446:exon3:c.A194G:p.D65Gv3bCPA4:NM\_0016352:exon3:c.A194G:p.D65G  
 16:22153010:G:A MetaPanNET-12 VWA3A VWA3A:NM\_173615:exon24:c.G2491A:p.V831M  
 1:207680011:G:A MetaPanNET-12 CR1 CR1:NM\_000573:exon3:c.G314A:p.R105Hv3bCR1:NM\_000651:exon3:c.G314A:p.R105H  
 5:87492126:G:A MetaPanNET-7 TMEM161B TMEM161B:NM\_00123354:exon12:c.C1366T:p.R456Xv3bTMEM161B:NM\_001289008:exon13:c.C1333T:p.R445X  
 19:56953985:T:A MetaPanNET-2 ZNF667 ZNF667:NM\_022103:exon5:c.A379T:p.K127X  
 1:201179721:A:G MetaPanNET-4 IGFN1 IGFN1:NM\_001164586:exon12:c.A5700G:p.I1900M  
 3:130427138:G:A MetaPanNET-4 PIK3R4 PIK3R4:NM\_014602:exon10:c.C2530T:p.R844W  
 2:88879037:T:A MetaPanNET-9 EIF2AK3 EIF2AK3:NM\_004836:exon11:c.A1885T:p.R629W  
 16:81242149:T:C MetaPanNET-17 PKD1L2 PKD1L2:NM\_01076780:exon4:c.A707G:p.N236S  
 12:124856848:G:A MetaPanNET-11 NCOR2 NCOR2:NM\_001077261:exon21:c.C2473T:p.Q825Xv3bNCOR2:NM\_001206654:exon21:c.C2473T:p.Q825Xv3bNCOR2:NM\_006312:exon22:c.C2527T:p.Q843X  
 11:47660301:T:A MetaPanNET-3 MTFCH2 MTFCH2:NM\_014342:exon3:c.A229T:p.R77X  
 X:73641827:A:C MetaPanNET-7 SLC16A2 SLC16A2:NM\_006517:exon1:c.A355C:p.N119H  
 11:1017195:A:T MetaPanNET-12 MUC6 MUC6:NM\_005961:exon31:c.T5606A:p.I1869N  
 3:47098559:G:A MetaPanNET-1 SETD2 SETD2:NM\_014159:exon15:c.C6715T:p.Q2239X  
 7:135258432:C:T MetaPanNET-13 NUP205 NUP205:NM\_0015135:exon3:c.C202T:p.Q68X  
 20:49510244:G:T MetaPanNET-20 ADNP ADNP:NM\_001282532:exon4:c.C1007A:p.S336Yv3bADNP:NM\_181442:exon4:c.C1007A:p.S336Yv3bADNP:NM\_015339:exon5:c.C1007A:p.S336Yv3bADNP:NM\_001282531:  
 2:17187556:G:A MetaPanNET-12 GAD1 GAD1:NM\_000817:exon5:c.G401A:p.R134Hv3bGAD1:NM\_013445:exon5:c.G401A:p.R134H  
 16:80638380:C:T MetaPanNET-17 CDYL2 CDYL2:NM\_152342:exon7:c.G1426A:p.E476K  
 12:102130837:C:G MetaPanNET-5 SYCP3 SYCP3:NM\_00117948:exon4:c.G213C:p.Q71Hv3bSYCP3:NM\_00117949:exon4:c.G213C:p.Q71Hv3bSYCP3:NM\_153694:exon4:c.G213C:p.Q71H  
 X:71351047:T:G MetaPanNET-12 RGAG4 RGAG4:NM\_001024455:exon1:c.A344C:p.D115A  
 6:56496189:T:A MetaPanNET-6 DST  
 5:50350982:G:A MetaPanNET-5 SHROOM4 SHROOM4:NM\_020717:exon6:c.C3160T:p.R1054C  
 1:15625554:G:A MetaPanNET-5 TMEM79 TMEM79:NM\_003233:exon2:c.G526A:p.E176K  
 5:154307037:CT:C MetaPanNET-14 GEMIN5 GEMIN5:NM\_001252156:exon7:c.984delA:p.E328fsv3bGEMIN5:NM\_015465:exon7:c.987delA:p.E329fs  
 2:120861676:CT:C MetaPanNET-16 EPB41L5 EPB41L5:NM\_001184938:exon17:c.C1378T:p.Q460Xv3bEPB41L5:NM\_001184939:exon17:c.C1378T:p.Q460X  
 3:3954420:A:T MetaPanNET-8 MOB8 MOB8:NM\_001278323:exon2:c.A401T:p.E134Vv3bMOB8:NM\_001278322:exon4:c.A473T:p.E158V  
 7:101988683:CT:C MetaPanNET-15 SPDY6E SPDY6E:NM\_001146210:exon6:c.G1010A:p.R337H  
 4:144442640:A:G MetaPanNET-12 SMARCA5 SMARCA5:NM\_003601:exon3:c.A311G:p.H104R  
 2:86682301:C:A MetaPanNET-5 KDM3A KDM3A:NM\_001146688:exon5:c.C547A:p.L83Iv3bKDM3A:NM\_018433:exon5:c.C547A:p.L83I  
 1:148025797:T:A MetaPanNET-7 NBPFR NBPFR:NM\_001037501:exon7:c.A1055T:p.K352M  
 4:27009169:G:A MetaPanNET-9 STIM2 STIM2:NM\_001169117:exon8:c.997delA:p.K333fv3bSTIM2:NM\_001169118:exon8:c.997delA:p.K333fv3bSTIM2:NM\_020860:exon8:c.997delA:p.K333fs  
 15:24921522:G:T MetaPanNET-15 NPAP1 NPAP1:NM\_0018958:exon1:c.G508T:p.E170X  
 14:2654419:T:C MetaPanNET-9 FOXJ3 FOXJ3:NM\_001198852:exon10:c.A1532G:p.H51Rv3bFOXJ3:NM\_001198850:exon11:c.A1634G:p.H545Rv3bFOXJ3:NM\_014947:exon11:c.A1634G:p.H545Rv3bFOXJ3:NM\_  
 3:14565935:A:C MetaPanNET-9 GRIP2 GRIP2:NM\_001198850:exon10:c.A1532G:p.H51Rv3bFOXJ3:NM\_001198850:exon11:c.A1634G:p.H545Rv3bFOXJ3:NM\_014947:exon11:c.A1634G:p.H545Rv3bFOXJ3:NM\_  
 12:40882402:G:C MetaPanNET-4 MUC19 MUC19:NM\_001198850:exon10:c.A1532G:p.H51Rv3bFOXJ3:NM\_001198850:exon11:c.A1634G:p.H545Rv3bFOXJ3:NM\_014947:exon11:c.A1634G:p.H545Rv3bFOXJ3:NM\_  
 18:9599108:C:G MetaPanNET-14 GBP7 GBP7:NM\_207398:exon10:c.G1495C:p.E499Q  
 5:94876520:C:T MetaPanNET-10 TTC37 TTC37:NM\_014639:exon8:c.G417A:p.W139X  
 1:186024779:G:A MetaPanNET-18 HMCN1 HMCN1:NM\_031935:exon4:c.G7117A:p.D2373N  
 3:126360948:C:A MetaPanNET-12 TXNRD3 TXNRD3:NM\_001002925:exon1:c.A187T:p.T63S  
 11:56409729:T:A MetaPanNET-10 ORSP2 ORSP2:NM\_001002925:exon1:c.A187T:p.T63S  
 1:240370952:C:T MetaPanNET-4 FNM2 FNM2:NM\_001305424:exon6:c.C2852T:p.P951L  
 11:1269557:C:T MetaPanNET-16 MUC5B MUC5B:NM\_002458:exon31:c.C11447T:p.T3816M  
 1:103544290:G:A MetaPanNET-10 COL11A1 COL11A1:NM\_001190709:exon3:c.411delT:p.F137fsv3bCOL11A1:NM\_001854:exon3:c.411delT:p.F137fsv3bCOL11A1:NM\_080629:exon3:c.411delT:p.F137fsv3bCOL11A1:  
 2:207824388:C:T MetaPanNET-16 CPO CPO:NM\_173077:exon5:c.C406T:p.R136C  
 5:148563113:CACA:C MetaPanNET-2 ABLM3 ABLM3:NM\_001301015:exon2:c.113\_115del:p.38\_39delv3bABLM3:NM\_001301018:exon2:c.113\_115del:p.38\_39delv3bABLM3:NM\_001301027:exon2:c.58\_60del:p.20\_  
 15:23685043:G:A MetaPanNET-12 GOLGA6L2 GOLGA6L2:NM\_001304388:exon8:c.T2579C:p.V860A  
 7:100550552:A:T MetaPanNET-3 MUC3A MUC3A:NM\_005960:exon2:c.A1133T:p.E378V  
 3:4774792:C:A MetaPanNET-5 SMARCC1 SMARCC1:NM\_003074:exon10:c.G947T:p.R316I  
 11:66392438:C:T MetaPanNET-10 RBM14 RBM14:NM\_006328:exon2:c.C1091T:p.S364F  
 19:34843769:C:A MetaPanNET-18 KIAA0355 KIAA0355:NM\_0014686:exon14:c.C1322A:p.P1041Q  
 22:3180858:G:A MetaPanNET-11 DPAD5C DPAD5C:NM\_001360209:exon9:c.G621A:p.W207Xv3bDPAD5C:NM\_0014662:exon9:c.G621A:p.W207Xv3bDPAD5C:NM\_001007188:exon10:c.G621A:p.W207Xv3bDPAD5C:NM  
 10:117849387:C:A MetaPanNET-17 GFRA1 GFRA1:NM\_145793:exon7:c.G1047T:p.W349Cv3bGFRA1:NM\_001145453:exon8:c.G1047T:p.W349Cv3bGFRA1:NM\_005264:exon9:c.G1062T:p.W354C  
 2:228884219:C:T MetaPanNET-17 SPHK4 SPHK4:NM\_001142644:exon7:c.G1351A:p.V451Iv3bSPHK4:NM\_003623:exon7:c.G1351A:p.V451I  
 12:40881029:A:G MetaPanNET-2 MUC19 MUC19:NM\_001198852:exon10:c.A1532G:p.H51Rv3bFOXJ3:NM\_001198850:exon11:c.A1634G:p.H545Rv3bFOXJ3:NM\_014947:exon11:c.A1634G:p.H545Rv3bFOXJ3:NM\_  
 6:38831681:G:T MetaPanNET-17 DNAH8 DNAH8:NM\_001206927:exon45:c.G6343T:p.D2115Y  
 16:30745279:G:A MetaPanNET-17 SRCAP SRCAP:NM\_006662:exon30:c.G6559A:p.G2187R  
 20:23016500:G:A MetaPanNET-5 SSTR4 SSTR4:NM\_001052:exon1:c.G380A:p.G127D  
 4:103645126:T:TA MetaPanNET-8 MANBA  
 11:6621951:C:T MetaPanNET-5 RRP8 RRP8:NM\_015324:exon5:c.G1102A:p.G368R  
 12:44167781:C:T MetaPanNET-16 IRAK4 IRAK4:NM\_001145258:exon4:c.C293T:p.T98Iv3bIRAK4:NM\_001145257:exon5:c.C293T:p.T98Iv3bIRAK4:NM\_001145256:exon6:c.C293T:p.T98Iv3bIRAK4:NM\_016123:exon1  
 7:80456740:C:G MetaPanNET-12 SEMA3C SEMA3C:NM\_001145258:exon4:c.C293T:p.T98Iv3bIRAK4:NM\_001145257:exon5:c.C293T:p.T98Iv3bIRAK4:NM\_001145256:exon6:c.C293T:p.T98Iv3bIRAK4:NM\_016123:exon1  
 3:195513874:G:A MetaPanNET-6 MUC4 MUC4:NM\_018406:exon2:c.T4577C:p.L1526P  
 9:136219616:G:T MetaPanNET-5 SURF1 SURF1:NM\_001280787:exon5:c.C194A:p.T65Nv3bSURF1:NM\_003172:exon6:c.C521A:p.T174N  
 16:22545743:TTCCACCTCAGC:T MetaPanNET-1 NPFB5 NPFB5:NM\_001135865:exon7:c.1440\_1451del:p.480\_484del  
 4:86871:G:T MetaPanNET-17 ZNF595 ZNF595:NM\_001135865:exon7:c.1440\_1451del:p.480\_484del  
 4:81188120:C:T MetaPanNET-14 FGF5 FGF5:NM\_004464:exon1:c.C142T:p.Q48Xv3bFGF5:NM\_0033143:exon1:c.C142T:p.Q48X  
 1:151337465:C:T MetaPanNET-4 SELENBP1 SELENBP1:NM\_001258288:exon10:c.G1007A:p.R336Hv3bSELENBP1:NM\_001258289:exon11:c.G1319A:p.R440Hv3bSELENBP1:NM\_003944:exon11:c.G1193A:p.R398H  
 12:81064150:T:C MetaPanNET-16 PTPRQ PTPRQ:NM\_001145026:exon39:c.T5965C:p.C1989R  
 20:44333165:G:A MetaPanNET-17 WFDC10B WFDC10B:NM\_001145026:exon39:c.T5965C:p.C1989R  
 6:33288701:G:C MetaPanNET-3 DAXX DAXX:NM\_001254717:exon2:c.C626G:p.P209Rv3bDAXX:NM\_001141969:exon3:c.C851G:p.P284Rv3bDAXX:NM\_001141970:exon3:c.C887G:p.P296Rv3bDAXX:NM\_001350:  
 15:52194098:T:A MetaPanNET-10 TMOD3 TMOD3:NM\_014547:exon9:c.T889A:p.L297M  
 1:19632579:T:C MetaPanNET-15 AKR7A2 AKR7A2:NM\_003689:exon6:c.A851G:p.Y284C  
 5:42807036:A:G MetaPanNET-11 SEPP1  
 21:30433870:C:T MetaPanNET-16 CCT8 CCT8:NM\_001282909:exon11:c.G1012A:p.G338Rv3bCCT8:NM\_001282908:exon12:c.G1078A:p.G360Rv3bCCT8:NM\_006585:exon12:c.G1231A:p.G411Rv3bCCT8:NM\_0012  
 13:75863164:G:C MetaPanNET-5 TBC1D4 TBC1D4:NM\_001286659:exon18:c.C380A:p.S1127Xv3bTBC1D4:NM\_001286658:exon19:c.C3545A:p.S1182Xv3bTBC1D4:NM\_014832:exon20:c.C3569A:p.S1190X  
 22:24724831:C:T MetaPanNET-2 SPECC1L SPECC1L:NM\_001145468:exon6:c.C2164T:p.Q722Xv3bSPECC1L:NM\_001254732:exon6:c.C2164T:p.Q722Xv3bSPECC1L:NM\_015330:exon7:c.C2164T:p.Q722X  
 11:133792574:A:G MetaPanNET-5 IGFBP9 IGFBP9:NM\_001277285:exon16:c.T2171C:p.L724P  
 6:82933900:T:C MetaPanNET-17 IBTK IBTK:NM\_001300906:exon7:c.A828G:p.I276Mv3bIBTK:NM\_015525:exon7:c.A828G:p.I276M  
 20:45910894:C:A MetaPanNET-17 ZMYND8 ZMYND8:NM\_001281771:exon10:c.G875T:p.R292Mv3bZMYND8:NM\_001281775:exon10:c.G950T:p.R317Mv3bZMYND8:NM\_001281776:exon10:c.G950T:p.R317Mv3bZM  
 7:150761678:C:T MetaPanNET-8 SLC4A2 SLC4A2:NM\_001199693:exon3:c.C256T:p.R86Cv3bSLC4A2:NM\_001199694:exon3:c.C241T:p.R81Cv3bSLC4A2:NM\_001199692:exon4:c.C283T:p.R95Cv3bSLC4A2:NM\_0030  
 17:16675914:G:C MetaPanNET-11 CCDC144A CCDC144A:NM\_014695:exon17:c.G4142C:p.G1381A  
 9:37887862:A:C MetaPanNET-18 SLC25A5 SLC25A5:NM\_003412:exon3:c.T686G:p.F229R  
 1:152082539:C:T MetaPanNET-4 TCHH TCHH:NM\_007113:exon3:c.G3154A:p.E1052K  
 8:57224835:C:T MetaPanNET-2 SDR16C5 SDR16C5:NM\_138969:exon3:c.G346A:p.V116I  
 2:136680485:G:A MetaPanNET-2 DARS DARS:NM\_001293312:exon8:c.C380T:p.A127Vv3bDARS:NM\_001349:exon9:c.C680T:p.A227V  
 22:26272162:C:T MetaPanNET-8 MYO18B MYO18B:NM\_0032608:exon24:c.C4087T:p.R1363X  
 22:20940854:G:T MetaPanNET-13 MED15  
 11:121986579:G:C MetaPanNET-3 BUD BUD:NM\_001001786:exon1:c.C52G:p.L18V



15:23685955:T:C MetaPanNET-15 GOLGA6L2 GOLGA6L2:NM\_001304388:exon3:c.11667G:p.E556G

9:112018754:C:G MetaPanNET-5 EPB41L14B EPB41L14B:NM\_018424:exon8:c.G759C:p.K253N;x3bEPB41L14B:NM\_019114:exon8:c.G759C:p.K253N

3:195513900:G:C MetaPanNET-12 MUC4 MUC4:NM\_018406:exon2:c.C4551G:p.H1517Q

18:29104778:C:A MetaPanNET-13 DSG2 DSG2:NM\_001943:exon8:c.C941A:p.S314X

3:195509287:T:G MetaPanNET-10 MUC4 MUC4:NM\_018406:exon2:c.A9164C:p.N3055T

12:3702281:C:T MetaPanNET-18 PRMT8 PRMT8:NM\_001256536:exon10:c.C1091T:p.T364I;x3bPRMT8:NM\_019854:exon10:c.C1118T:p.T371

6:30954749:G:A MetaPanNET-10 MUC21 MUC21:NM\_001010909:exon2:c.G797A:p.G266E

X:1720309:G:C MetaPanNET-7 AKAP17A AKAP17A:NM\_005088:exon5:c.G1910C:p.R637P

14:39771451:TAGGTATTAAGT:C:T MetaPanNET-4 CTAG5E CTAG5E:NM\_001247988:exon10:c.828\_829del:p.L276fs;x3bCTAG5E:NM\_001247988:exon10:c.930\_931del:p.L310fs;x3bCTAG5E:NM\_001247990:exon10:c.690\_691del:p.L23

4:190878552:G:A MetaPanNET-17 FRG1

10:102763900:G:A MetaPanNET-5 LZTS2 LZTS2:NM\_032429:exon3:c.G1045A:p.E349K

1:8927177:G:A MetaPanNET-2 ENO1 ENO1:NM\_001201483:exon3:c.C164T:p.P55L;x3bENO1:NM\_001428:exon6:c.C443T:p.P148L

6:33373174:C:G MetaPanNET-18 KIFC1 KIFC1:NM\_002263:exon7:c.C1302G:p.I434M

1:236305962:G:C MetaPanNET-14 GPR137B GPR137B:NM\_003272:exon1:c.G40C:p.G14R

17:47875679:A:T MetaPanNET-14 KAT7

X:152913718:C:T MetaPanNET-8 DUSP9 DUSP9:NM\_001395:exon2:c.C311T:p.S104L

1:16902957:G:A MetaPanNET-2 NBPFF1 UNKNOW

3:195505979:T:C MetaPanNET-10 MUC4 MUC4:NM\_018406:exon2:c.A12472G:p.T4158A

4:338130:C:G MetaPanNET-18 ZNF141 ZNF141:NM\_003441:exon3:c.C137G:p.A46G

2:231742224:G:A MetaPanNET-16 ITM2C ITM2C:NM\_001012514:exon4:c.G530A:p.G177E;x3bITM2C:NM\_001012516:exon4:c.G560A:p.G187E;x3bITM2C:NM\_001287240:exon5:c.G485A:p.G162E;x3bITM2C:NM\_03C

13:73482676:C:T MetaPanNET-16 PIBF1 PIBF1:NM\_006346:exon12:c.C1496T:p.T499I

5:90144485:G:C MetaPanNET-1 ADGRV1 ADGRV1:NM\_032119:exon79:c.G17051C:p.S5684T

13:21357994:G:C MetaPanNET-11 XPO4 XPO4:NM\_022459:exon23:c.G3323C:p.R1108T

1:16902915:G:A MetaPanNET-2 NBPFF1 UNKNOW

3:51430895:C:T MetaPanNET-2 RBM15B RBM15B:NM\_0013286:exon1:c.C2065T:p.R689W

3:195511513:G:A MetaPanNET-4 MUC4 MUC4:NM\_018406:exon2:c.C6938T:p.A2313V

12:68647197:A:G MetaPanNET-15 IL22 IL22:NM\_020525:exon1:c.T32C:p.F115

10:93773506:A:G MetaPanNET-14 BTAF1 BTAF1:NM\_003972:exon31:c.A4394G:p.Y1465C

11:7110515:C:T MetaPanNET-14 RBMXL2 RBMXL2:NM\_014469:exon1:c.C164T:p.T55I

19:53572327:C:T MetaPanNET-12 ZNF160 ZNF160:NM\_033288:exon6:c.G1460A:p.S487N;x3bZNF160:NM\_001102603:exon7:c.G1460A:p.S487N;x3bZNF160:NM\_198893:exon7:c.G1460A:p.S487N

16:22086951:G:T MetaPanNET-17 C16orf52 C16orf52:NM\_001164579:exon2:c.G250T:p.G84C

5:75428011:G:A MetaPanNET-2 SV2C SV2C:NM\_001297716:exon2:c.G436A:p.G1465;x3bSV2C:NM\_014979:exon2:c.G436A:p.G1465

13:25670801:T:G MetaPanNET-6 PABPC3 PABPC3:NM\_030979:exon1:c.465\_466insG:p.I555f

19:9086088:A:T MetaPanNET-5 MUC16 MUC16:NM\_024690:exon1:c.T572A:p.H1909Q

2:131976077:C:A MetaPanNET-17 POTE1 POTE1:NM\_001083538:exon1:c.C102A:p.C34X

22:40042787:G:A MetaPanNET-7 CACNA11 CACNA11:NM\_001003406:exon8:c.G1363A:p.G455S

17:56833466:A:ACCCGAA PPM1E PPM1E:NM\_001490:exon1:c.108\_109insCCGAA:p.E36delinsEPE

19:22171651:C:T MetaPanNET-5 ZNF208 ZNF208:NM\_007153:exon2:c.G64A:p.D22N

1:247201695:C:A MetaPanNET-5 ZNF670 ZNF670:NM\_001204220:exon4:c.G223T:p.E75Y;x3bZNF670:NM\_033213:exon4:c.G226T:p.E76X

10:7772046:G:A MetaPanNET-17 ITIH2 ITIH2:NM\_002216:exon12:c.G1411A:p.G471R

11:40136012:CTG:C MetaPanNET-1 LRRc4C LRRc4C:NM\_020929:exon5:c.1828\_1830del:p.610\_610del;x3bLRRc4C:NM\_001258419:exon7:c.1828\_1830del:p.610\_610del

6:33287320:A:T MetaPanNET-12 DAXX DAXX:NM\_001254717:exon5:c.1551delA:p.Q517fs;x3bDAXX:NM\_001141969:exon6:c.1776delA:p.Q592fs;x3bDAXX:NM\_001141970:exon6:c.1812delA:p.Q604fs;x3bDAXX:NI

7:75130916:C:G MetaPanNET-5 SPDYE5 SPDYE5:NM\_001099435:exon6:c.C791G:p.S264C

1:152800275:C:A MetaPanNET-5 LCE1A LCE1A:NM\_178348:exon1:c.C327A:p.C109X

18:24442266:C:G MetaPanNET-5 AQP4 AQP4:NM\_004028:exon1:c.G261C:p.K87N;x3bAQP4:NM\_001650:exon2:c.G327C:p.K109N

3:52469819:C:T MetaPanNET-18 SEMA3G SEMA3G:NM\_020163:exon16:c.T1429A:p.A717T

7:44047183:G:C MetaPanNET-5 SPDYE1 SPDYE1:NM\_175064:exon5:c.G949C:p.E317Q

10:106982894:C:T MetaPanNET-14 SORCS3 SORCS3:NM\_014978:exon20:c.C2755T:p.L919F

16:72923651:T:A MetaPanNET-14 ZFXH3 ZFXH3:NM\_001164766:exon3:c.A685T:p.R229W;x3bZFXH3:NM\_006885:exon4:c.A3427T:p.R1143W

17:7705319:C:A MetaPanNET-4 DNAH2 DNAH2:NM\_020877:exon58:c.C8956A:p.L2986M

15:72020908:C:T MetaPanNET-8 THSD4 THSD4:NM\_001286429:exon3:c.C298T:p.R100C;x3bTHSD4:NM\_024817:exon8:c.C1378T:p.R460C

X:51075941:C:T MetaPanNET-18 NUDT10 NUDT10:NM\_001304963:exon1:c.C124T:p.P425;x3bNUDT10:NM\_153183:exon2:c.C124T:p.P425

15:79586392:G:A MetaPanNET-5 ANKRD34C ANKRD34C:NM\_001146341:exon2:c.G766A:p.G256S

8:53045633:C:G MetaPanNET-2 ST18 ST18:NM\_014682:exon21:c.G2428C:p.E810Q

1:36563637:C:T MetaPanNET-10 COL8A2 COL8A2:NM\_001294347:exon4:c.G1450A:p.G4845;x3bCOL8A2:NM\_005202:exon4:c.G1645A:p.G549S

21:38852962:G:A MetaPanNET-14 DYRK1A DYRK1A:NM\_001396:exon4:c.G350A:p.R1170;x3bDYRK1A:NM\_130436:exon4:c.G323A:p.R108Q;x3bDYRK1A:NM\_130438:exon4:c.G350A:p.R117Q;x3bDYRK1A:NM\_1001395

7:139662031:A:G MetaPanNET-10 TBXAS1 TBXAS1:NM\_001061:exon9:c.A1136G:p.H379R;x3bTBXAS1:NM\_030984:exon9:c.A1136G:p.H379R;x3bTBXAS1:NM\_001166253:exon10:c.A1274G:p.H425R;x3bTBXAS1:NM\_C

5:149546722:C:T MetaPanNET-13 CDX1 CDX1:NM\_001804:exon1:c.C283T:p.P95S

3:172163142:A:T MetaPanNET-2 GHRN GHRN:NM\_198407:exon2:c.T910A:p.C3045

9:78686749:G:T MetaPanNET-18 PCSK5 PCSK5:NM\_001190482:exon7:c.G829T:p.D277Y;x3bPCSK5:NM\_006200:exon7:c.G829T:p.D277Y

11:64577329:TAGACT:C MetaPanNET-7 MEN1 MEN1:NM\_000244:exon2:c.249\_252del:p.L83fs;x3bMEN1:NM\_130800:exon2:c.249\_252del:p.L83fs;x3bMEN1:NM\_1300

22:36682805:T:A MetaPanNET-16 MYH9 MYH9:NM\_002473:exon35:c.A5020T:p.K1674X

2:201873697:G:A MetaPanNET-10 MFM12B MFM12B:NM\_173822:exon7:c.C529T:p.R177W

1:201176138:G:A MetaPanNET-14 IGFN1 IGFN1:NM\_001164586:exon12:c.G2117A:p.G706E

8:124141459:G:A MetaPanNET-12 TBC1D31

16:74443490:C:T MetaPanNET-16 CLEC18B

1:145298247:C:T MetaPanNET-15 NBPFF10 NBPFF10:NM\_001039703:exon5:c.C659T:p.S220F;x3bNBPFF10:NM\_001302371:exon5:c.C659T:p.S220F

3:195508654:G:T MetaPanNET-3 MUC4 MUC4:NM\_018406:exon2:c.C9797A:p.P3266H

11:118361922:C:T MetaPanNET-5 KMT2A KMT2A:NM\_001197104:exon14:c.C4708T:p.P1570S;x3bKMT2A:NM\_005933:exon14:c.C4708T:p.P1570S

12:531858087:G:A MetaPanNET-14 KRT3 KRT3:NM\_057088:exon7:c.C1438T:p.R480W

19:37835599:C:T MetaPanNET-1 HKR1 HKR1:NM\_181786:exon3:c.C137T:p.H5Y

8:126075778:C:T MetaPanNET-5 KIAA0196 KIAA0196:NM\_014846:exon11:c.G1394A:p.R465K

1:100133298:A:C MetaPanNET-14 PALMD PALMD:NM\_017734:exon3:c.A227C:p.Q76P

3:47163437:GAGTT:G MetaPanNET-13 SETD2 SETD2:NM\_014159:exon3:c.2685\_2688del:p.L895fs

6:160509083:C:T MetaPanNET-2 IGF2R IGF2R:NM\_000876:exon42:c.C6224T:p.T2075M

2:70047943:C:T MetaPanNET-14 ANXA4 ANXA4:NM\_001153:exon12:c.C896T:p.S299L

3:195506761:G:A MetaPanNET-14 MUC4 MUC4:NM\_018406:exon2:c.C11690T:p.A3897V

1:117142707:G:A MetaPanNET-12 IGSF3 IGSF3:NM\_001072377:exon7:c.C1885T:p.R629C;x3bIGSF3:NM\_001542:exon7:c.C1945T:p.R649C

11:64083293:G:T MetaPanNET-9 ESRR4 ESRR4:NM\_001282450:exon7:c.G1127T:p.R376L;x3bESRR4:NM\_001282451:exon7:c.G1124T:p.R375L;x3bESRR4:NM\_004451:exon7:c.G1127T:p.R376L

4:190878608:C:A MetaPanNET-15 FRG1 FRG1:NM\_004477:exon6:c.G488A:p.G163E

22:22036804:A:T MetaPanNET-9 PPI2 PPI2:NM\_014337:exon8:c.A466T:p.I156F;x3bPPI2:NM\_148175:exon8:c.A466T:p.I156F

11:34904971:A:T MetaPanNET-16 AP1P AP1P:NM\_015957:exon6:c.T542A:p.M181K

15:23685920:A:C MetaPanNET-17 GOLGA6L2 GOLGA6L2:NM\_001304388:exon8:c.T1702G:p.S568A

12:40879080:C:T MetaPanNET-17 MUC19 UNKNOW

16:27476823:G:T MetaPanNET-5 GTF3C1 GTF3C1:NM\_001286242:exon33:c.C5113A:p.L1705I;x3bGTF3C1:NM\_001520:exon33:c.C5113A:p.L1705I

2:71840511:G:T MetaPanNET-14 DYSF DYSF:NM\_001130976:exon39:c.G4339T:p.D1447Y;x3bDYSF:NM\_001130977:exon39:c.G4339T:p.D1447Y;x3bDYSF:NM\_001130984:exon39:c.G4342T:p.D1448Y;x3bDYSF:NM

3:9424966:T:C MetaPanNET-12 THUMPD3 THUMPD3:NM\_00114092:exon8:c.T1208C:p.I403T;x3bTHUMPD3:NM\_015453:exon8:c.T1208C:p.I403T

18:52895577:G:T MetaPanNET-17 TCF4 TCF4:NM\_001243234:exon12:c.C1415A:p.P472Q;x3bTCF4:NM\_001243235:exon12:c.C1403A:p.P468Q;x3bTCF4:NM\_001243236:exon12:c.C1403A:p.P468Q;x3bTCF4:NM\_00

17:7319307:C:CT MetaPanNET-13 NLGN2 NLGN2:NM\_020795:exon6:c.1516dupT:p.P505fs

8:52733102:G:A MetaPanNET-9 PCMTD1 PCMTD1:NM\_001286782:exon4:c.C655T:p.L219F;x3bPCMTD1:NM\_001286783:exon6:c.C355T:p.L119F;x3bPCMTD1:NM\_052937:exon6:c.C883T:p.L295F

13:77459959:C:T MetaPanNET-5 KCTD12 KCTD12:NM\_138444:exon1:c.G325A:p.E109K

1:52289446:G:A MetaPanNET-6 NRD1 NRD1:NM\_001101662:exon7:c.C1049T:p.T350M;x3bNRD1:NM\_001242361:exon9:c.C857T:p.T286M;x3bNRD1:NM\_002525:exon9:c.C1253T:p.T418M

6:24289090:G:C MetaPanNET-13 DCDC2 DCDC2:NM\_016356:exon6:c.C749G:p.S250C;x3bDCDC2:NM\_001195610:exon7:c.C749G:p.S250C

16:2301430:C:T MetaPanNET-5 EC11 EC11:NM\_001178029:exon2:c.G53A:p.G18E;x3bEC11:NM\_001919:exon2:c.G53A:p.G18E

22:32100659:G:C MetaPanNET-8 PRR14L PRR14L:NM\_173566:exon5:c.C5810G:p.T1937S

12:40884121:C:A MetaPanNET-19 MUC19 UNKNOW

3:195508903:G:A MetaPanNET-19 MUC4 MUC4:NM\_018406:exon2:c.C9548T:p.T3183M

1:169580892:CTT MetaPanNET-19 SELP SELP:NM\_003005:exon7:c.984\_985insAA:p.A329fs

9:42410368:T:C MetaPanNET-19 ANKRD20A2;x3bANKRD20A3 ANKRD20A3:NM\_001012419:exon15:c.T2357C:p.M786T;x3bANKRD20A2:NM\_001012421:exon15:c.T2357C:p.M786T

15:51735781:G:A:G MetaPanNET-19 RNF11 RNF11:NM\_014372:exon2:c.278delA:p.E93fs

3:10018733:G:C MetaPanNET-19 EMC3 EMC3:NM\_018447:exon3:c.C215G:p.S72C

15:74174052:G:A MetaPanNET-19 TBC1D21 TBC1D21:NM\_001286434:exon2:c.C128A:p.S43Y;x3bTBC1D21:NM\_153356:exon3:c.C236A:p.S79Y

14:103429476:C:T MetaPanNET-19 CDC42BPB CDC42BPB:NM\_006035:exon20:c.G2743A:p.E91SK

8:7320252:G:T MetaPanNET-19 SPAG11B SPAG11B:NM\_016512:exon2:c.C191A:p.P640;x3bSPAG11B:NM\_058200:exon2:c.C191A:p.P640;x3bSPAG11B:NM\_058201:exon2:c.C191A:p.P640;x3bSPAG11B:NM\_058202

19:15273370:T:A MetaPanNET-19 NOSH2C NOSH2C:NM\_000435:exon32:c.A5819T:p.K1940I

7:100550696:C:T MetaPanNET-19 MUC3A MUC3A:NM\_005960:exon2:c.C1277T:p.T426I

15:23685904:G:A MetaPanNET-19 GOLGA6L2 GOLGA6L2:NM\_001304388:exon8:c.T1718C:p.V573A

6:32713061:C:A MetaPanNET-19 HLA-DQA2 HLA-DQA2:NM\_020056:exon2:c.C208A:p.Q70K

3:195506844:G:C MetaPanNET-19 MUC4 MUC4:NM\_018406:exon2:c.C11607G:p.H3869Q

1:4772582:G:GCCA AJA1 AJA1:NM\_001042478:exon2:c.652\_653insCCA:p.A218delinsAT;x3bAJA1:NM\_018836:exon2:c.652\_653insCCA:p.A218delinsAT

5:140953360:G:C MetaPanNET-19 DIAPH1 DIAPH1:NM\_001079812:exon15:c.G2030C:p.R677Y;x3bDIAPH1:NM\_005219:exon16:c.G2057C:p.R686T

**Supplementary Table 2. Pathologic findings and immunohistochemical/FISH status of 347 pancreatic neuroendocrine tumors.**

| Patient | Tumor size (cm) | Histologic grade | ALT status | ATRX expression | DAXX expression | H3K36me3 expression | ARID1A expression | <i>CDKN2A /CEP9</i> ratio |
|---------|-----------------|------------------|------------|-----------------|-----------------|---------------------|-------------------|---------------------------|
| 1       | 0.6             | G1               | Negative   | Preserved       | Preserved       | Preserved           | Preserved         | 0.99 (Wild type)          |
| 2       | 0.6             | G2               | Negative   | Preserved       | Preserved       | Preserved           | Preserved         | 1.18 (Wild type)          |
| 3       | 0.6             | G1               | Negative   | Preserved       | Preserved       | Preserved           | Preserved         | 0.96 (Wild type)          |
| 4       | 0.6             | G1               | Negative   | Preserved       | Preserved       | Preserved           | Preserved         | 1.05 (Wild type)          |
| 5       | 0.6             | G1               | Negative   | Preserved       | Preserved       | Preserved           | Preserved         | 1.06 (Wild type)          |
| 6       | 0.7             | G1               | Negative   | Preserved       | Preserved       | Preserved           | Preserved         | 1.03 (Wild type)          |
| 7       | 0.7             | G1               | Negative   | Preserved       | Preserved       | Preserved           | Preserved         | 0.97 (Wild type)          |
| 8       | 0.7             | G1               | Negative   | Preserved       | Preserved       | Preserved           | Preserved         | 1.00 (Wild type)          |
| 9       | 0.7             | G1               | Negative   | Preserved       | Preserved       | Preserved           | Preserved         | 0.96 (Wild type)          |
| 10      | 0.7             | G1               | Negative   | Preserved       | Preserved       | Preserved           | Preserved         | 1.00 (Wild type)          |
| 11      | 0.8             | G1               | Negative   | Preserved       | Preserved       | Preserved           | Preserved         | 0.96 (Wild type)          |
| 12      | 0.8             | G1               | Negative   | Preserved       | Preserved       | Preserved           | Preserved         | 1.02 (Wild type)          |
| 13      | 0.8             | G1               | Negative   | Preserved       | Preserved       | Preserved           | Preserved         | 1.00 (Wild type)          |
| 14      | 0.8             | G1               | Negative   | Preserved       | Preserved       | Preserved           | Preserved         | 1.12 (Wild type)          |
| 15      | 0.8             | G1               | Negative   | Preserved       | Preserved       | Preserved           | Preserved         | 1.00 (Wild type)          |
| 16      | 0.9             | G1               | Negative   | Preserved       | Preserved       | Preserved           | Preserved         | 1.00 (Wild type)          |
| 17      | 0.9             | G1               | Negative   | Preserved       | Preserved       | Preserved           | Preserved         | 1.02 (Wild type)          |
| 18      | 0.9             | G1               | Negative   | Preserved       | Preserved       | Preserved           | Preserved         | 1.00 (Wild type)          |
| 19      | 0.9             | G1               | Negative   | Preserved       | Preserved       | Preserved           | Preserved         | 1.13 (Wild type)          |
| 20      | 0.9             | G1               | Negative   | Preserved       | Preserved       | Preserved           | Preserved         | 1.02 (Wild type)          |
| 21      | 1.0             | G1               | Positive   | Loss            | Preserved       | Preserved           | Preserved         | 1.11 (Wild type)          |
| 22      | 1.0             | G1               | Negative   | Preserved       | Preserved       | Preserved           | Preserved         | 1.02 (Wild type)          |
| 23      | 1.0             | G1               | Negative   | Preserved       | Preserved       | Preserved           | Preserved         | 1.00 (Wild type)          |
| 24      | 1.0             | G1               | Negative   | Preserved       | Preserved       | Preserved           | Preserved         | 0.97 (Wild type)          |
| 25      | 1.0             | G2               | Negative   | Preserved       | Preserved       | Preserved           | Preserved         | 1.01 (Wild type)          |
| 26      | 1.0             | G1               | Negative   | Preserved       | Preserved       | Preserved           | Preserved         | 0.89 (Wild type)          |
| 27      | 1.0             | G2               | Negative   | Preserved       | Preserved       | Preserved           | Preserved         | 1.02 (Wild type)          |
| 28      | 1.0             | G2               | Negative   | Preserved       | Preserved       | Preserved           | Preserved         | 1.01 (Wild type)          |
| 29      | 1.0             | G1               | Negative   | Preserved       | Preserved       | Preserved           | Preserved         | 1.00 (Wild type)          |



|    |     |    |          |           |           |           |           |                  |
|----|-----|----|----------|-----------|-----------|-----------|-----------|------------------|
| 30 | 1.0 | G1 | Negative | Preserved | Preserved | Preserved | Preserved | 1.02 (Wild type) |
| 31 | 1.0 | G2 | Negative | Preserved | Preserved | Preserved | Preserved | 1.00 (Wild type) |
| 32 | 1.0 | G1 | Negative | Preserved | Preserved | Preserved | Preserved | 0.99 (Wild type) |
| 33 | 1.0 | G1 | Negative | Preserved | Preserved | Preserved | Preserved | 0.99 (Wild type) |
| 34 | 1.0 | G1 | Negative | Preserved | Preserved | Preserved | Preserved | 0.96 (Wild type) |
| 35 | 1.0 | G1 | Negative | Preserved | Preserved | Preserved | Preserved | 1.00 (Wild type) |
| 36 | 1.1 | G1 | Negative | Preserved | Preserved | Preserved | Preserved | 0.98 (Wild type) |
| 37 | 1.1 | G2 | Negative | Preserved | Preserved | Preserved | Preserved | 1.02 (Wild type) |
| 38 | 1.1 | G1 | Negative | Preserved | Preserved | Preserved | Preserved | 0.99 (Wild type) |
| 39 | 1.1 | G2 | Negative | Preserved | Preserved | Preserved | Preserved | 0.98 (Wild type) |
| 40 | 1.1 | G1 | Negative | Preserved | Preserved | Preserved | Preserved | 1.00 (Wild type) |
| 41 | 1.1 | G1 | Negative | Preserved | Preserved | Preserved | Preserved | 1.01 (Wild type) |
| 42 | 1.2 | G2 | Positive | Loss      | Preserved | Loss      | Preserved | 1.00 (Wild type) |
| 43 | 1.2 | G1 | Negative | Preserved | Preserved | Preserved | Preserved | 1.00 (Wild type) |
| 44 | 1.2 | G2 | Negative | Preserved | Preserved | Preserved | Preserved | 1.03 (Wild type) |
| 45 | 1.2 | G1 | Negative | Preserved | Preserved | Preserved | Preserved | 0.93 (Wild type) |
| 46 | 1.2 | G1 | Negative | Preserved | Preserved | Preserved | Preserved | 1.05 (Wild type) |
| 47 | 1.2 | G1 | Negative | Preserved | Preserved | Preserved | Preserved | 0.91 (Wild type) |
| 48 | 1.2 | G2 | Negative | Preserved | Preserved | Preserved | Preserved | 0.95 (Wild type) |
| 49 | 1.3 | G1 | Negative | Preserved | Preserved | Loss      | Preserved | 1.07 (Wild type) |
| 50 | 1.3 | G1 | Negative | Preserved | Preserved | Preserved | Preserved | 1.11 (Wild type) |
| 51 | 1.3 | G1 | Negative | Preserved | Preserved | Preserved | Preserved | 0.96 (Wild type) |
| 52 | 1.3 | G2 | Negative | Preserved | Preserved | Preserved | Preserved | 1.01 (Wild type) |
| 53 | 1.3 | G2 | Negative | Preserved | Preserved | Preserved | Preserved | 1.01 (Wild type) |
| 54 | 1.3 | G1 | Negative | Preserved | Preserved | Preserved | Preserved | 1.04 (Wild type) |
| 55 | 1.3 | G1 | Negative | Preserved | Preserved | Preserved | Preserved | 1.06 (Wild type) |
| 56 | 1.3 | G1 | Negative | Preserved | Preserved | Preserved | Preserved | 0.98 (Wild type) |
| 57 | 1.3 | G1 | Negative | Preserved | Preserved | Preserved | Preserved | 1.02 (Wild type) |
| 58 | 1.3 | G1 | Negative | Preserved | Preserved | Preserved | Preserved | 0.99 (Wild type) |
| 59 | 1.3 | G1 | Negative | Preserved | Preserved | Preserved | Preserved | 1.06 (Wild type) |
| 60 | 1.4 | G1 | Negative | Preserved | Preserved | Preserved | Preserved | 0.96 (Wild type) |
| 61 | 1.4 | G2 | Negative | Preserved | Preserved | Preserved | Preserved | 0.99 (Wild type) |
| 62 | 1.4 | G2 | Negative | Preserved | Preserved | Preserved | Preserved | 0.92 (Wild type) |

|    |     |    |          |           |           |           |           |                  |
|----|-----|----|----------|-----------|-----------|-----------|-----------|------------------|
| 63 | 1.4 | G2 | Negative | Preserved | Preserved | Preserved | Preserved | 1.00 (Wild type) |
| 64 | 1.4 | G1 | Negative | Preserved | Preserved | Preserved | Preserved | 0.98 (Wild type) |
| 65 | 1.4 | G1 | Negative | Preserved | Preserved | Preserved | Preserved | 1.02 (Wild type) |
| 66 | 1.4 | G1 | Negative | Preserved | Preserved | Preserved | Preserved | 0.99 (Wild type) |
| 67 | 1.5 | G2 | Negative | Preserved | Preserved | Loss      | Preserved | 1.00 (Wild type) |
| 68 | 1.5 | G1 | Positive | Preserved | Loss      | Preserved | Preserved | 0.95 (Wild type) |
| 69 | 1.5 | G1 | Negative | Preserved | Preserved | Preserved | Preserved | 0.88 (Wild type) |
| 70 | 1.5 | G1 | Negative | Preserved | Preserved | Preserved | Preserved | 1.00 (Wild type) |
| 71 | 1.5 | G1 | Negative | Preserved | Preserved | Preserved | Preserved | 0.99 (Wild type) |
| 72 | 1.5 | G1 | Negative | Preserved | Preserved | Preserved | Preserved | 0.98 (Wild type) |
| 73 | 1.5 | G1 | Negative | Preserved | Preserved | Preserved | Preserved | 1.02 (Wild type) |
| 74 | 1.5 | G1 | Negative | Preserved | Preserved | Preserved | Preserved | 1.05 (Wild type) |
| 75 | 1.5 | G1 | Negative | Preserved | Preserved | Preserved | Preserved | 1.06 (Wild type) |
| 76 | 1.5 | G1 | Negative | Preserved | Preserved | Preserved | Preserved | 1.04 (Wild type) |
| 77 | 1.5 | G1 | Negative | Preserved | Preserved | Preserved | Preserved | 0.97 (Wild type) |
| 78 | 1.5 | G1 | Negative | Preserved | Preserved | Preserved | Preserved | 1.03 (Wild type) |
| 79 | 1.5 | G1 | Negative | Preserved | Preserved | Preserved | Preserved | 1.07 (Wild type) |
| 80 | 1.5 | G2 | Negative | Preserved | Preserved | Preserved | Preserved | 1.22 (Wild type) |
| 81 | 1.5 | G2 | Negative | Preserved | Preserved | Preserved | Preserved | 1.01 (Wild type) |
| 82 | 1.5 | G2 | Negative | Preserved | Preserved | Preserved | Preserved | 1.06 (Wild type) |
| 83 | 1.5 | G1 | Negative | Preserved | Preserved | Preserved | Preserved | 0.99 (Wild type) |
| 84 | 1.5 | G2 | Negative | Preserved | Preserved | Preserved | Preserved | 0.96 (Wild type) |
| 85 | 1.5 | G1 | Negative | Preserved | Preserved | Preserved | Preserved | 1.03 (Wild type) |
| 86 | 1.5 | G1 | Negative | Preserved | Preserved | Preserved | Preserved | 0.99 (Wild type) |
| 87 | 1.5 | G1 | Negative | Preserved | Preserved | Preserved | Preserved | 1.05 (Wild type) |
| 88 | 1.5 | G1 | Negative | Preserved | Preserved | Preserved | Preserved | 0.99 (Wild type) |
| 89 | 1.5 | G1 | Negative | Preserved | Preserved | Preserved | Preserved | 0.98 (Wild type) |
| 90 | 1.5 | G1 | Negative | Preserved | Preserved | Preserved | Preserved | 0.95 (Wild type) |
| 91 | 1.5 | G1 | Negative | Preserved | Preserved | Preserved | Preserved | 1.19 (Wild type) |
| 92 | 1.5 | G1 | Negative | Preserved | Preserved | Preserved | Preserved | 1.04 (Wild type) |
| 93 | 1.5 | G1 | Negative | Preserved | Preserved | Preserved | Preserved | 0.99 (Wild type) |
| 94 | 1.5 | G1 | Negative | Preserved | Preserved | Preserved | Preserved | 0.98 (Wild type) |
| 95 | 1.6 | G1 | Negative | Preserved | Preserved | Preserved | Preserved | 1.08 (Wild type) |

|     |     |    |          |           |           |           |           |                  |
|-----|-----|----|----------|-----------|-----------|-----------|-----------|------------------|
| 96  | 1.6 | G1 | Negative | Preserved | Preserved | Preserved | Preserved | 1.23 (Wild type) |
| 97  | 1.6 | G2 | Negative | Preserved | Preserved | Preserved | Preserved | 1.00 (Wild type) |
| 98  | 1.6 | G1 | Negative | Preserved | Preserved | Preserved | Preserved | 1.10 (Wild type) |
| 99  | 1.7 | G2 | Positive | Preserved | Loss      | Preserved | Loss      | 1.07 (Wild type) |
| 100 | 1.7 | G1 | Negative | Preserved | Preserved | Preserved | Preserved | 1.16 (Wild type) |
| 101 | 1.7 | G1 | Negative | Preserved | Preserved | Preserved | Preserved | 1.00 (Wild type) |
| 102 | 1.7 | G2 | Negative | Preserved | Preserved | Preserved | Preserved | 1.05 (Wild type) |
| 103 | 1.7 | G1 | Negative | Preserved | Preserved | Preserved | Preserved | 1.03 (Wild type) |
| 104 | 1.7 | G1 | Negative | Preserved | Preserved | Preserved | Preserved | 0.98 (Wild type) |
| 105 | 1.7 | G1 | Negative | Preserved | Preserved | Preserved | Preserved | 0.85 (Wild type) |
| 106 | 1.8 | G2 | Positive | Preserved | Preserved | Preserved | Preserved | 0.95 (Wild type) |
| 107 | 1.8 | G1 | Negative | Preserved | Preserved | Preserved | Preserved | 1.04 (Wild type) |
| 108 | 1.8 | G1 | Negative | Preserved | Preserved | Preserved | Preserved | 1.00 (Wild type) |
| 109 | 1.8 | G2 | Negative | Preserved | Preserved | Preserved | Preserved | 1.08 (Wild type) |
| 110 | 1.8 | G1 | Negative | Preserved | Preserved | Preserved | Preserved | 0.99 (Wild type) |
| 111 | 1.8 | G1 | Negative | Preserved | Preserved | Preserved | Preserved | 1.04 (Wild type) |
| 112 | 1.8 | G1 | Negative | Preserved | Preserved | Preserved | Preserved | 1.23 (Wild type) |
| 113 | 1.9 | G1 | Negative | Preserved | Preserved | Preserved | Preserved | 0.96 (Wild type) |
| 114 | 2.0 | G2 | Positive | Loss      | Preserved | Preserved | Preserved | 0.46 (Deletion)  |
| 115 | 2.0 | G2 | Positive | Loss      | Loss      | Preserved | Preserved | 0.65 (Deletion)  |
| 116 | 2.0 | G2 | Negative | Preserved | Preserved | Loss      | Preserved | 1.01 (Wild type) |
| 117 | 2.0 | G2 | Positive | Preserved | Loss      | Preserved | Preserved | 0.98 (Wild type) |
| 118 | 2.0 | G1 | Positive | Loss      | Loss      | Preserved | Preserved | 1.04 (Wild type) |
| 119 | 2.0 | G1 | Negative | Preserved | Preserved | Preserved | Preserved | 1.04 (Wild type) |
| 120 | 2.0 | G1 | Negative | Preserved | Preserved | Preserved | Preserved | 1.00 (Wild type) |
| 121 | 2.0 | G1 | Negative | Preserved | Preserved | Preserved | Preserved | 1.10 (Wild type) |
| 122 | 2.0 | G1 | Negative | Preserved | Preserved | Preserved | Preserved | 1.00 (Wild type) |
| 123 | 2.0 | G1 | Negative | Preserved | Preserved | Preserved | Preserved | 1.15 (Wild type) |
| 124 | 2.0 | G2 | Negative | Preserved | Preserved | Preserved | Preserved | 1.03 (Wild type) |
| 125 | 2.0 | G1 | Negative | Preserved | Preserved | Preserved | Preserved | 1.04 (Wild type) |
| 126 | 2.0 | G1 | Negative | Preserved | Preserved | Preserved | Preserved | 1.01 (Wild type) |
| 127 | 2.0 | G2 | Negative | Preserved | Preserved | Preserved | Preserved | 1.01 (Wild type) |
| 128 | 2.0 | G2 | Negative | Preserved | Preserved | Preserved | Preserved | 0.96 (Wild type) |

|     |     |    |          |           |           |           |           |                  |
|-----|-----|----|----------|-----------|-----------|-----------|-----------|------------------|
| 129 | 2.0 | G1 | Negative | Preserved | Preserved | Preserved | Preserved | 1.07 (Wild type) |
| 130 | 2.0 | G1 | Negative | Preserved | Preserved | Preserved | Preserved | 1.01 (Wild type) |
| 131 | 2.1 | G1 | Negative | Preserved | Preserved | Preserved | Preserved | 0.96 (Wild type) |
| 132 | 2.1 | G1 | Negative | Preserved | Preserved | Preserved | Preserved | 0.97 (Wild type) |
| 133 | 2.1 | G2 | Negative | Preserved | Preserved | Preserved | Preserved | 0.94 (Wild type) |
| 134 | 2.1 | G1 | Negative | Preserved | Preserved | Preserved | Preserved | 1.03 (Wild type) |
| 135 | 2.1 | G2 | Negative | Preserved | Preserved | Preserved | Preserved | 1.05 (Wild type) |
| 136 | 2.1 | G1 | Negative | Preserved | Preserved | Preserved | Preserved | 0.98 (Wild type) |
| 137 | 2.1 | G2 | Negative | Preserved | Preserved | Preserved | Preserved | 1.11 (Wild type) |
| 138 | 2.2 | G1 | Positive | Preserved | Loss      | Preserved | Preserved | 1.02 (Wild type) |
| 139 | 2.2 | G1 | Negative | Preserved | Preserved | Preserved | Preserved | 1.00 (Wild type) |
| 140 | 2.2 | G1 | Negative | Preserved | Preserved | Preserved | Preserved | 1.17 (Wild type) |
| 141 | 2.2 | G1 | Negative | Preserved | Preserved | Preserved | Preserved | 0.96 (Wild type) |
| 142 | 2.2 | G1 | Negative | Preserved | Preserved | Preserved | Preserved | 0.94 (Wild type) |
| 143 | 2.2 | G1 | Negative | Preserved | Preserved | Preserved | Preserved | 1.02 (Wild type) |
| 144 | 2.2 | G1 | Negative | Preserved | Preserved | Preserved | Preserved | 1.01 (Wild type) |
| 145 | 2.2 | G1 | Negative | Preserved | Preserved | Preserved | Preserved | 1.00 (Wild type) |
| 146 | 2.3 | G1 | Negative | Preserved | Preserved | Preserved | Preserved | 0.98 (Wild type) |
| 147 | 2.3 | G2 | Negative | Preserved | Preserved | Preserved | Preserved | 1.15 (Wild type) |
| 148 | 2.4 | G1 | Positive | Preserved | Loss      | Preserved | Preserved | 0.97 (Wild type) |
| 149 | 2.4 | G1 | Negative | Preserved | Preserved | Preserved | Preserved | 1.04 (Wild type) |
| 150 | 2.4 | G1 | Negative | Preserved | Preserved | Preserved | Preserved | 0.97 (Wild type) |
| 151 | 2.4 | G1 | Negative | Preserved | Preserved | Preserved | Preserved | 1.00 (Wild type) |
| 152 | 2.4 | G1 | Negative | Preserved | Preserved | Preserved | Preserved | 0.97 (Wild type) |
| 153 | 2.4 | G1 | Negative | Preserved | Preserved | Preserved | Preserved | 1.19 (Wild type) |
| 154 | 2.4 | G1 | Negative | Preserved | Preserved | Preserved | Preserved | 1.16 (Wild type) |
| 155 | 2.5 | G1 | Positive | Loss      | Preserved | Preserved | Preserved | 0.66 (Deletion)  |
| 156 | 2.5 | G2 | Positive | Preserved | Preserved | Preserved | Preserved | 0.55 (Deletion)  |
| 157 | 2.5 | G2 | Negative | Preserved | Preserved | Preserved | Loss      | 0.46 (Deletion)  |
| 158 | 2.5 | G1 | Positive | Preserved | Loss      | Loss      | Preserved | 1.00 (Wild type) |
| 159 | 2.5 | G2 | Positive | Preserved | Loss      | Preserved | Preserved | 1.00 (Wild type) |
| 160 | 2.5 | G2 | Positive | Loss      | Loss      | Preserved | Preserved | 1.06 (Wild type) |
| 161 | 2.5 | G2 | Positive | Loss      | Loss      | Preserved | Preserved | 0.96 (Wild type) |

|     |     |    |          |           |           |           |           |                  |
|-----|-----|----|----------|-----------|-----------|-----------|-----------|------------------|
| 162 | 2.5 | G1 | Negative | Preserved | Preserved | Preserved | Preserved | 1.02 (Wild type) |
| 163 | 2.5 | G2 | Negative | Preserved | Preserved | Preserved | Preserved | 1.10 (Wild type) |
| 164 | 2.5 | G2 | Negative | Preserved | Preserved | Preserved | Preserved | 0.88 (Wild type) |
| 165 | 2.5 | G1 | Negative | Preserved | Preserved | Preserved | Preserved | 1.00 (Wild type) |
| 166 | 2.5 | G1 | Negative | Preserved | Preserved | Preserved | Preserved | 1.04 (Wild type) |
| 167 | 2.5 | G1 | Negative | Preserved | Preserved | Preserved | Preserved | 0.99 (Wild type) |
| 168 | 2.5 | G2 | Negative | Preserved | Preserved | Preserved | Preserved | 1.13 (Wild type) |
| 169 | 2.5 | G1 | Negative | Preserved | Preserved | Preserved | Preserved | 0.99 (Wild type) |
| 170 | 2.5 | G1 | Negative | Preserved | Preserved | Preserved | Preserved | 0.96 (Wild type) |
| 171 | 2.5 | G1 | Negative | Preserved | Preserved | Preserved | Preserved | 1.04 (Wild type) |
| 172 | 2.5 | G1 | Negative | Preserved | Preserved | Preserved | Preserved | 0.97 (Wild type) |
| 173 | 2.5 | G1 | Negative | Preserved | Preserved | Preserved | Preserved | 0.98 (Wild type) |
| 174 | 2.5 | G1 | Negative | Preserved | Preserved | Preserved | Preserved | 1.08 (Wild type) |
| 175 | 2.5 | G3 | Negative | Preserved | Preserved | Preserved | Preserved | 1.04 (Wild type) |
| 176 | 2.6 | G2 | Negative | Preserved | Preserved | Preserved | Preserved | 0.99 (Wild type) |
| 177 | 2.7 | G1 | Negative | Preserved | Preserved | Loss      | Preserved | 0.67 (Deletion)  |
| 178 | 2.7 | G1 | Positive | Loss      | Loss      | Preserved | Preserved | 0.96 (Wild type) |
| 179 | 2.7 | G1 | Negative | Preserved | Preserved | Preserved | Preserved | 0.96 (Wild type) |
| 180 | 2.7 | G1 | Negative | Preserved | Preserved | Preserved | Preserved | 1.00 (Wild type) |
| 181 | 2.7 | G1 | Negative | Preserved | Preserved | Preserved | Preserved | 1.19 (Wild type) |
| 182 | 2.8 | G1 | Negative | Preserved | Preserved | Preserved | Preserved | 0.59 (Deletion)  |
| 183 | 2.8 | G2 | Positive | Loss      | Loss      | Loss      | Preserved | 1.06 (Wild type) |
| 184 | 2.8 | G1 | Positive | Loss      | Preserved | Preserved | Preserved | 1.01 (Wild type) |
| 185 | 2.8 | G1 | Negative | Preserved | Preserved | Preserved | Preserved | 1.00 (Wild type) |
| 186 | 2.8 | G1 | Negative | Preserved | Preserved | Preserved | Preserved | 1.00 (Wild type) |
| 187 | 2.8 | G1 | Negative | Preserved | Preserved | Preserved | Preserved | 0.99 (Wild type) |
| 188 | 2.8 | G1 | Negative | Preserved | Preserved | Preserved | Preserved | 1.00 (Wild type) |
| 189 | 2.8 | G1 | Negative | Preserved | Preserved | Preserved | Preserved | 1.00 (Wild type) |
| 190 | 2.8 | G1 | Negative | Preserved | Preserved | Preserved | Preserved | 1.00 (Wild type) |
| 191 | 2.9 | G1 | Negative | Preserved | Preserved | Preserved | Preserved | 1.05 (Wild type) |
| 192 | 3.0 | G2 | Positive | Loss      | Preserved | Preserved | Preserved | 0.35 (Deletion)  |
| 193 | 3.0 | G1 | Negative | Preserved | Preserved | Preserved | Preserved | 0.70 (Deletion)  |
| 194 | 3.0 | G1 | Negative | Preserved | Preserved | Preserved | Preserved | 0.43 (Deletion)  |

|     |     |    |          |           |           |           |           |                  |
|-----|-----|----|----------|-----------|-----------|-----------|-----------|------------------|
| 195 | 3.0 | G2 | Positive | Loss      | Loss      | Loss      | Preserved | 1.11 (Wild type) |
| 196 | 3.0 | G2 | Positive | Loss      | Preserved | Preserved | Preserved | 1.01 (Wild type) |
| 197 | 3.0 | G2 | Positive | Preserved | Loss      | Preserved | Preserved | 1.00 (Wild type) |
| 198 | 3.0 | G1 | Positive | Loss      | Loss      | Preserved | Preserved | 1.01 (Wild type) |
| 199 | 3.0 | G2 | Positive | Preserved | Preserved | Preserved | Preserved | 0.99 (Wild type) |
| 200 | 3.0 | G2 | Negative | Preserved | Preserved | Preserved | Preserved | 1.08 (Wild type) |
| 201 | 3.0 | G2 | Negative | Preserved | Preserved | Preserved | Preserved | 1.00 (Wild type) |
| 202 | 3.0 | G2 | Negative | Preserved | Preserved | Preserved | Preserved | 0.89 (Wild type) |
| 203 | 3.0 | G1 | Negative | Preserved | Preserved | Preserved | Preserved | 0.99 (Wild type) |
| 204 | 3.0 | G1 | Negative | Preserved | Preserved | Preserved | Preserved | 0.96 (Wild type) |
| 205 | 3.0 | G1 | Negative | Preserved | Preserved | Preserved | Preserved | 1.06 (Wild type) |
| 206 | 3.0 | G2 | Negative | Preserved | Preserved | Preserved | Preserved | 1.00 (Wild type) |
| 207 | 3.1 | G1 | Positive | Loss      | Preserved | Preserved | Preserved | 1.00 (Wild type) |
| 208 | 3.1 | G1 | Negative | Preserved | Preserved | Preserved | Preserved | 1.00 (Wild type) |
| 209 | 3.2 | G1 | Positive | Loss      | Preserved | Preserved | Preserved | 1.11 (Wild type) |
| 210 | 3.2 | G1 | Negative | Preserved | Preserved | Preserved | Preserved | 0.92 (Wild type) |
| 211 | 3.2 | G1 | Negative | Preserved | Preserved | Preserved | Preserved | 1.01 (Wild type) |
| 212 | 3.3 | G1 | Negative | Preserved | Preserved | Preserved | Preserved | 0.84 (Wild type) |
| 213 | 3.4 | G2 | Positive | Preserved | Preserved | Preserved | Preserved | 1.02 (Wild type) |
| 214 | 3.5 | G1 | Positive | Loss      | Preserved | Loss      | Preserved | 0.65 (Deletion)  |
| 215 | 3.5 | G1 | Negative | Preserved | Preserved | Preserved | Preserved | 0.74 (Deletion)  |
| 216 | 3.5 | G1 | Positive | Preserved | Loss      | Preserved | Loss      | 1.02 (Wild type) |
| 217 | 3.5 | G2 | Positive | Preserved | Loss      | Loss      | Preserved | 0.97 (Wild type) |
| 218 | 3.5 | G2 | Negative | Preserved | Preserved | Loss      | Preserved | 1.12 (Wild type) |
| 219 | 3.5 | G1 | Negative | Preserved | Preserved | Loss      | Preserved | 0.99 (Wild type) |
| 220 | 3.5 | G1 | Negative | Preserved | Preserved | Loss      | Preserved | 1.10 (Wild type) |
| 221 | 3.5 | G2 | Positive | Loss      | Loss      | Preserved | Preserved | 1.01 (Wild type) |
| 222 | 3.5 | G2 | Positive | Preserved | Loss      | Preserved | Preserved | 1.00 (Wild type) |
| 223 | 3.5 | G2 | Positive | Loss      | Preserved | Preserved | Preserved | 1.02 (Wild type) |
| 224 | 3.5 | G2 | Positive | Loss      | Preserved | Preserved | Preserved | 1.14 (Wild type) |
| 225 | 3.5 | G1 | Positive | Loss      | Preserved | Preserved | Preserved | 1.02 (Wild type) |
| 226 | 3.5 | G2 | Positive | Loss      | Preserved | Preserved | Preserved | 1.19 (Wild type) |
| 227 | 3.5 | G1 | Positive | Preserved | Preserved | Preserved | Preserved | 0.98 (Wild type) |

|     |     |    |          |           |           |           |           |                  |
|-----|-----|----|----------|-----------|-----------|-----------|-----------|------------------|
| 228 | 3.5 | G1 | Negative | Preserved | Preserved | Preserved | Preserved | 1.07 (Wild type) |
| 229 | 3.5 | G2 | Negative | Preserved | Preserved | Preserved | Preserved | 1.06 (Wild type) |
| 230 | 3.5 | G1 | Negative | Preserved | Preserved | Preserved | Preserved | 1.01 (Wild type) |
| 231 | 3.5 | G1 | Negative | Preserved | Preserved | Preserved | Preserved | 0.97 (Wild type) |
| 232 | 3.6 | G2 | Negative | Preserved | Preserved | Preserved | Preserved | 0.97 (Wild type) |
| 233 | 3.6 | G1 | Negative | Preserved | Preserved | Preserved | Preserved | 0.95 (Wild type) |
| 234 | 3.6 | G2 | Negative | Preserved | Preserved | Preserved | Preserved | 1.03 (Wild type) |
| 235 | 3.7 | G1 | Positive | Loss      | Preserved | Preserved | Preserved | 0.65 (Deletion)  |
| 236 | 3.7 | G3 | Positive | Preserved | Loss      | Preserved | Preserved | 0.97 (Wild type) |
| 237 | 3.8 | G2 | Positive | Preserved | Loss      | Preserved | Preserved | 0.97 (Wild type) |
| 238 | 3.8 | G1 | Negative | Preserved | Preserved | Preserved | Preserved | 0.99 (Wild type) |
| 239 | 3.8 | G1 | Negative | Preserved | Preserved | Preserved | Preserved | 1.09 (Wild type) |
| 240 | 4.0 | G1 | Positive | Preserved | Loss      | Loss      | Preserved | 0.98 (Wild type) |
| 241 | 4.0 | G1 | Positive | Preserved | Preserved | Loss      | Preserved | 1.08 (Wild type) |
| 242 | 4.0 | G2 | Negative | Preserved | Preserved | Preserved | Loss      | 1.06 (Wild type) |
| 243 | 4.0 | G1 | Positive | Preserved | Loss      | Preserved | Preserved | 1.08 (Wild type) |
| 244 | 4.0 | G2 | Positive | Preserved | Loss      | Preserved | Preserved | 0.97 (Wild type) |
| 245 | 4.0 | G2 | Positive | Preserved | Loss      | Preserved | Preserved | 0.85 (Wild type) |
| 246 | 4.0 | G2 | Negative | Preserved | Preserved | Preserved | Preserved | 1.02 (Wild type) |
| 247 | 4.0 | G2 | Negative | Preserved | Preserved | Preserved | Preserved | 0.92 (Wild type) |
| 248 | 4.0 | G1 | Negative | Preserved | Preserved | Preserved | Preserved | 0.90 (Wild type) |
| 249 | 4.0 | G2 | Negative | Preserved | Preserved | Preserved | Preserved | 1.06 (Wild type) |
| 250 | 4.0 | G2 | Negative | Preserved | Preserved | Preserved | Preserved | 1.17 (Wild type) |
| 251 | 4.0 | G2 | Negative | Preserved | Preserved | Preserved | Preserved | 0.97 (Wild type) |
| 252 | 4.0 | G2 | Negative | Preserved | Preserved | Preserved | Preserved | 0.89 (Wild type) |
| 253 | 4.0 | G2 | Negative | Preserved | Preserved | Preserved | Preserved | 1.03 (Wild type) |
| 254 | 4.2 | G2 | Positive | Loss      | Loss      | Preserved | Preserved | 0.29 (Deletion)  |
| 255 | 4.2 | G1 | Negative | Preserved | Preserved | Preserved | Preserved | 1.03 (Wild type) |
| 256 | 4.2 | G1 | Negative | Preserved | Preserved | Preserved | Preserved | 0.99 (Wild type) |
| 257 | 4.2 | G3 | Negative | Preserved | Preserved | Preserved | Preserved | 0.99 (Wild type) |
| 258 | 4.2 | G2 | Negative | Preserved | Preserved | Preserved | Preserved | 0.98 (Wild type) |
| 259 | 4.4 | G1 | Negative | Preserved | Preserved | Preserved | Preserved | 1.04 (Wild type) |
| 260 | 4.5 | G3 | Negative | Preserved | Preserved | Preserved | Preserved | 0.67 (Deletion)  |

|     |     |    |          |           |           |           |           |                  |
|-----|-----|----|----------|-----------|-----------|-----------|-----------|------------------|
| 261 | 4.5 | G2 | Negative | Preserved | Preserved | Preserved | Loss      | 0.53 (Deletion)  |
| 262 | 4.5 | G2 | Positive | Loss      | Preserved | Loss      | Preserved | 0.96 (Wild type) |
| 263 | 4.5 | G3 | Negative | Preserved | Preserved | Preserved | Loss      | 1.01 (Wild type) |
| 264 | 4.5 | G2 | Positive | Loss      | Preserved | Preserved | Preserved | 0.93 (Wild type) |
| 265 | 4.5 | G2 | Positive | Preserved | Loss      | Preserved | Preserved | 0.98 (Wild type) |
| 266 | 4.5 | G2 | Positive | Preserved | Loss      | Preserved | Preserved | 0.99 (Wild type) |
| 267 | 4.5 | G1 | Negative | Preserved | Preserved | Preserved | Preserved | 0.95 (Wild type) |
| 268 | 4.5 | G1 | Negative | Preserved | Preserved | Preserved | Preserved | 0.97 (Wild type) |
| 269 | 4.5 | G1 | Negative | Preserved | Preserved | Preserved | Preserved | 0.96 (Wild type) |
| 270 | 4.5 | G1 | Negative | Preserved | Preserved | Preserved | Preserved | 0.99 (Wild type) |
| 271 | 4.5 | G1 | Negative | Preserved | Preserved | Preserved | Preserved | 0.99 (Wild type) |
| 272 | 4.5 | G2 | Negative | Preserved | Preserved | Preserved | Preserved | 0.86 (Wild type) |
| 273 | 4.6 | G2 | Positive | Preserved | Preserved | Preserved | Preserved | 0.99 (Wild type) |
| 274 | 4.6 | G2 | Negative | Preserved | Preserved | Preserved | Preserved | 0.98 (Wild type) |
| 275 | 4.6 | G2 | Negative | Preserved | Preserved | Preserved | Preserved | 0.99 (Wild type) |
| 276 | 4.8 | G1 | Positive | Loss      | Loss      | Preserved | Preserved | 0.97 (Wild type) |
| 277 | 4.9 | G2 | Positive | Preserved | Loss      | Preserved | Preserved | 0.69 (Deletion)  |
| 278 | 5.0 | G2 | Negative | Preserved | Preserved | Loss      | Preserved | 1.01 (Wild type) |
| 279 | 5.0 | G2 | Positive | Preserved | Loss      | Preserved | Preserved | 1.00 (Wild type) |
| 280 | 5.0 | G2 | Negative | Preserved | Preserved | Preserved | Preserved | 1.01 (Wild type) |
| 281 | 5.0 | G3 | Negative | Preserved | Preserved | Preserved | Preserved | 1.01 (Wild type) |
| 282 | 5.0 | G1 | Negative | Preserved | Preserved | Preserved | Preserved | 0.96 (Wild type) |
| 283 | 5.0 | G1 | Negative | Preserved | Preserved | Preserved | Preserved | 1.00 (Wild type) |
| 284 | 5.1 | G1 | Negative | Preserved | Preserved | Preserved | Preserved | 0.96 (Wild type) |
| 285 | 5.3 | G2 | Positive | Preserved | Loss      | Preserved | Preserved | 1.03 (Wild type) |
| 286 | 5.5 | G2 | Positive | Loss      | Preserved | Preserved | Preserved | 0.95 (Wild type) |
| 287 | 5.5 | G2 | Positive | Loss      | Loss      | Preserved | Preserved | 0.97 (Wild type) |
| 288 | 5.5 | G2 | Positive | Preserved | Loss      | Preserved | Preserved | 0.99 (Wild type) |
| 289 | 5.5 | G2 | Positive | Preserved | Loss      | Preserved | Preserved | 0.99 (Wild type) |
| 290 | 5.5 | G2 | Negative | Preserved | Preserved | Preserved | Preserved | 0.88 (Wild type) |
| 291 | 5.6 | G2 | Positive | Loss      | Preserved | Preserved | Preserved | 1.01 (Wild type) |
| 292 | 5.7 | G1 | Positive | Loss      | Preserved | Preserved | Preserved | 0.95 (Wild type) |
| 293 | 5.8 | G1 | Positive | Preserved | Preserved | Preserved | Preserved | 0.90 (Wild type) |



|     |     |    |          |           |           |           |           |                  |
|-----|-----|----|----------|-----------|-----------|-----------|-----------|------------------|
| 294 | 6.0 | G2 | Positive | Preserved | Loss      | Preserved | Preserved | 0.77 (Deletion)  |
| 295 | 6.0 | G2 | Negative | Preserved | Preserved | Preserved | Loss      | 0.95 (Wild type) |
| 296 | 6.0 | G2 | Negative | Preserved | Preserved | Loss      | Preserved | 1.00 (Wild type) |
| 297 | 6.0 | G2 | Negative | Preserved | Preserved | Loss      | Preserved | 1.00 (Wild type) |
| 298 | 6.0 | G2 | Negative | Preserved | Preserved | Loss      | Preserved | 0.89 (Wild type) |
| 299 | 6.0 | G2 | Positive | Preserved | Loss      | Preserved | Preserved | 0.97 (Wild type) |
| 300 | 6.0 | G2 | Positive | Loss      | Preserved | Preserved | Preserved | 0.98 (Wild type) |
| 301 | 6.0 | G1 | Positive | Loss      | Preserved | Preserved | Preserved | 1.02 (Wild type) |
| 302 | 6.0 | G2 | Positive | Preserved | Loss      | Preserved | Preserved | 0.99 (Wild type) |
| 303 | 6.0 | G1 | Positive | Preserved | Loss      | Preserved | Preserved | 0.96 (Wild type) |
| 304 | 6.0 | G2 | Negative | Preserved | Preserved | Preserved | Preserved | 0.96 (Wild type) |
| 305 | 6.0 | G1 | Negative | Preserved | Preserved | Preserved | Preserved | 0.94 (Wild type) |
| 306 | 6.0 | G2 | Negative | Preserved | Preserved | Preserved | Preserved | 0.84 (Wild type) |
| 307 | 6.4 | G2 | Negative | Preserved | Preserved | Loss      | Preserved | 0.48 (Deletion)  |
| 308 | 6.5 | G3 | Positive | Loss      | Loss      | Preserved | Preserved | 0.66 (Deletion)  |
| 309 | 6.5 | G2 | Positive | Preserved | Loss      | Loss      | Preserved | 0.98 (Wild type) |
| 310 | 6.5 | G2 | Negative | Preserved | Preserved | Preserved | Preserved | 1.03 (Wild type) |
| 311 | 6.5 | G2 | Negative | Preserved | Preserved | Preserved | Preserved | 1.00 (Wild type) |
| 312 | 6.5 | G2 | Negative | Preserved | Preserved | Preserved | Preserved | 0.91 (Wild type) |
| 313 | 6.8 | G2 | Positive | Preserved | Loss      | Preserved | Preserved | 0.98 (Wild type) |
| 314 | 7.0 | G2 | Positive | Preserved | Loss      | Preserved | Preserved | 1.01 (Wild type) |
| 315 | 7.0 | G1 | Positive | Loss      | Preserved | Preserved | Preserved | 0.93 (Wild type) |
| 316 | 7.0 | G2 | Positive | Loss      | Preserved | Preserved | Preserved | 0.95 (Wild type) |
| 317 | 7.0 | G1 | Negative | Preserved | Preserved | Preserved | Preserved | 0.97 (Wild type) |
| 318 | 7.0 | G2 | Negative | Preserved | Preserved | Preserved | Preserved | 0.98 (Wild type) |
| 319 | 7.0 | G2 | Negative | Preserved | Preserved | Preserved | Preserved | 0.92 (Wild type) |
| 320 | 7.5 | G2 | Positive | Preserved | Loss      | Preserved | Preserved | 0.24 (Deletion)  |
| 321 | 7.5 | G2 | Positive | Preserved | Preserved | Preserved | Preserved | 0.72 (Deletion)  |
| 322 | 7.5 | G2 | Positive | Preserved | Loss      | Preserved | Loss      | 0.97 (Wild type) |
| 323 | 7.5 | G2 | Positive | Preserved | Preserved | Preserved | Preserved | 0.98 (Wild type) |
| 324 | 7.5 | G2 | Negative | Preserved | Preserved | Preserved | Preserved | 1.00 (Wild type) |
| 325 | 7.5 | G1 | Negative | Preserved | Preserved | Preserved | Preserved | 0.95 (Wild type) |
| 326 | 7.5 | G1 | Negative | Preserved | Preserved | Preserved | Preserved | 0.95 (Wild type) |

|     |      |    |          |           |           |           |           |                  |
|-----|------|----|----------|-----------|-----------|-----------|-----------|------------------|
| 327 | 8.0  | G2 | Positive | Preserved | Loss      | Preserved | Preserved | 0.88 (Wild type) |
| 328 | 8.5  | G2 | Negative | Preserved | Preserved | Loss      | Preserved | 1.01 (Wild type) |
| 329 | 8.5  | G2 | Positive | Loss      | Preserved | Preserved | Preserved | 0.95 (Wild type) |
| 330 | 8.5  | G2 | Negative | Preserved | Preserved | Preserved | Preserved | 0.97 (Wild type) |
| 331 | 9.0  | G2 | Positive | Loss      | Loss      | Loss      | Preserved | 0.99 (Wild type) |
| 332 | 9.0  | G3 | Positive | Preserved | Preserved | Loss      | Preserved | 0.84 (Wild type) |
| 333 | 9.0  | G1 | Negative | Preserved | Preserved | Preserved | Loss      | 0.95 (Wild type) |
| 334 | 9.0  | G1 | Negative | Preserved | Preserved | Preserved | Preserved | 0.98 (Wild type) |
| 335 | 9.5  | G2 | Positive | Preserved | Preserved | Loss      | Preserved | 0.88 (Wild type) |
| 336 | 10.0 | G2 | Positive | Preserved | Loss      | Preserved | Preserved | 0.56 (Deletion)  |
| 337 | 10.0 | G2 | Positive | Preserved | Preserved | Preserved | Preserved | 0.53 (Deletion)  |
| 338 | 10.0 | G2 | Positive | Loss      | Preserved | Loss      | Preserved | 0.94 (Wild type) |
| 339 | 10.0 | G1 | Negative | Preserved | Preserved | Preserved | Preserved | 0.96 (Wild type) |
| 340 | 10.0 | G2 | Negative | Preserved | Preserved | Preserved | Preserved | 0.99 (Wild type) |
| 341 | 12.0 | G2 | Positive | Loss      | Preserved | Preserved | Preserved | 1.00 (Wild type) |
| 342 | 12.2 | G2 | Positive | Preserved | Loss      | Preserved | Preserved | 0.96 (Wild type) |
| 343 | 14.0 | G1 | Positive | Preserved | Loss      | Preserved | Preserved | 0.19 (Deletion)  |
| 344 | 15.0 | G2 | Positive | Loss      | Preserved | Preserved | Preserved | 0.95 (Wild type) |
| 345 | 15.0 | G2 | Positive | Loss      | Preserved | Preserved | Preserved | 0.95 (Wild type) |
| 346 | 17.0 | G2 | Negative | Preserved | Preserved | Preserved | Loss      | 0.94 (Wild type) |
| 347 | 18.0 | G2 | Positive | Preserved | Preserved | Loss      | Preserved | 0.93 (Wild type) |

*Abbreviations: ALT, alternative lengthening of telomeres*

ACCE

**Supplementary Table 3. Clinical and pathologic comparison of DAXX/ATRX, H3K36me3, ARID1A and CDKN2A status in non-syndromic well-differentiated PanNETs.**

| Patient or Tumor Characteristics     | DAXX/ATRX        |                  | <i>p</i> | H3K36me3         |                  | <i>p</i> | ARID1A           |                  | <i>p</i> | CDKN2A           |                  | <i>p</i> | DAXX/ATRX/H3K36me3/ARID1A/CDKN2A |                  | <i>p</i> |
|--------------------------------------|------------------|------------------|----------|------------------|------------------|----------|------------------|------------------|----------|------------------|------------------|----------|----------------------------------|------------------|----------|
|                                      | Preserved        | Loss             |          | Preserved        | Loss             |          | Preserved        | Loss             |          | Wildtype         | Deletion         |          | Preserved/Wildtype               | Loss/Deletion    |          |
| Gender                               |                  |                  |          |                  |                  |          |                  |                  |          |                  |                  |          |                                  |                  |          |
| Female                               | 139 (84%)        | 27 (16%)         | 0.005    | 155 (93%)        | 11 (7%)          | 0.431    | 161 (97%)        | 5 (3%)           | 1.000    | 154 (93%)        | 12 (7%)          | 1.000    | 124 (75%)                        | 42 (25%)         | 0.008    |
| Male                                 | 128 (71%)        | 53 (29%)         |          | 164 (91%)        | 17 (9%)          |          | 176 (97%)        | 5 (3%)           |          | 168 (93%)        | 13 (7%)          |          | 111 (61%)                        | 70 (39%)         |          |
| Mean age (range), years              | 58.3 (26 - 85)   | 61.3 (31 - 83)   | 0.057    | 59.1 (26 - 85)   | 57.6 (32 - 82)   | 0.546    | 59.1 (26 - 83)   | 57.3 (37 - 85)   | 0.679    | 58.8 (26 - 85)   | 61.8 (37 - 80)   | 0.241    | 58.4 (26 - 83)                   | 60.4 (31 - 85)   | 0.162    |
| Mean tumor size (range), cm          | 3.0 (0.6 - 18.0) | 5.0 (1.0 - 15.0) | < 0.001  | 3.3 (0.6 - 17.0) | 5.3 (1.2 - 18.0) | < 0.001  | 3.3 (0.6 - 18.0) | 6.0 (1.7 - 17.0) | 0.002    | 3.3 (0.6 - 18.0) | 4.9 (2.0 - 14.0) | 0.004    | 2.6 (0.6 - 10.0)                 | 5.2 (1.0 - 18.0) | < 0.001  |
| Functional*                          | 33 (92%)         | 3 (8%)           | 0.034    | 36 (100%)        | 0 (0%)           | 0.096    | 36 (100%)        | 0 (0%)           | 0.607    | 36 (100%)        | 0 (0%)           | 0.091    | 33 (92%)                         | 3 (8%)           | 0.001    |
| Insulinoma                           | 21 (100%)        | 0 (0%)           |          | 21 (100%)        | 0 (0%)           |          | 21 (100%)        | 0 (0%)           |          | 21 (100%)        | 0 (0%)           |          | 21 (100%)                        | 0 (0%)           |          |
| Gastrinoma                           | 7 (88%)          | 1 (12%)          |          | 8 (100%)         | 0 (0%)           |          | 8 (100%)         | 0 (0%)           |          | 8 (100%)         | 0 (0%)           |          | 7 (88%)                          | 1 (12%)          |          |
| Glucagonoma                          | 4 (100%)         | 0 (0%)           |          | 4 (100%)         | 0 (0%)           |          | 4 (100%)         | 0 (0%)           |          | 4 (100%)         | 0 (0%)           |          | 4 (100%)                         | 0 (0%)           |          |
| Somatostatinoma                      | 0 (0%)           | 1 (100%)         |          | 1 (100%)         | 0 (0%)           |          | 1 (100%)         | 0 (0%)           |          | 1 (100%)         | 0 (0%)           |          | 0 (0%)                           | 1 (100%)         |          |
| VIPoma                               | 1 (100%)         | 0 (0%)           |          | 1 (100%)         | 0 (0%)           |          | 1 (100%)         | 0 (0%)           |          | 1 (100%)         | 0 (0%)           |          | 1 (100%)                         | 0 (0%)           |          |
| ACTH-producing                       | 0 (0%)           | 1 (100%)         |          | 1 (100%)         | 0 (0%)           |          | 1 (100%)         | 0 (0%)           |          | 1 (100%)         | 0 (0%)           |          | 0 (0%)                           | 1 (100%)         |          |
| Location                             |                  |                  |          |                  |                  |          |                  |                  |          |                  |                  |          |                                  |                  |          |
| Head and uncinate                    | 104 (79%)        | 27 (21%)         | 0.432    | 113 (86%)        | 18 (14%)         | 0.004    | 128 (98%)        | 3 (2%)           | 0.748    | 120 (92%)        | 11 (8%)          | 0.526    | 88 (67%)                         | 43 (33%)         | 0.906    |
| Body and tail                        | 163 (75%)        | 53 (25%)         |          | 206 (95%)        | 10 (5%)          |          | 209 (97%)        | 7 (3%)           |          | 202 (94%)        | 14 (6%)          |          | 147 (68%)                        | 69 (32%)         |          |
| WHO grade                            |                  |                  |          |                  |                  |          |                  |                  |          |                  |                  |          |                                  |                  |          |
| Low (G1)                             | 175 (88%)        | 24 (12%)         | < 0.001  | 191 (96%)        | 8 (4%)           | 0.004    | 197 (99%)        | 2 (1%)           | 0.026    | 190 (95%)        | 9 (5%)           | 0.033    | 165 (83%)                        | 34 (17%)         | < 0.001  |
| Intermediate (G2)                    | 86 (61%)         | 54 (39%)         |          | 121 (86%)        | 19 (14%)         |          | 133 (95%)        | 7 (5%)           |          | 126 (90%)        | 14 (10%)         |          | 67 (48%)                         | 73 (52%)         |          |
| High (G3)                            | 6 (75%)          | 2 (25%)          |          | 7 (88%)          | 1 (12%)          |          | 7 (88%)          | 1 (12%)          |          | 6 (75%)          | 2 (25%)          |          | 3 (38%)                          | 5 (62%)          |          |
| Lymphovascular invasion              | 93 (61%)         | 60 (39%)         | < 0.001  | 133 (87%)        | 20 (13%)         | 0.003    | 143 (93%)        | 10 (7%)          | < 0.001  | 131 (86%)        | 22 (14%)         | < 0.001  | 67 (44%)                         | 86 (56%)         | < 0.001  |
| Perineural invasion                  | 59 (65%)         | 32 (25%)         | 0.002    | 77 (85%)         | 14 (15%)         | 0.006    | 86 (95%)         | 5 (5%)           | 0.136    | 78 (86%)         | 13 (14%)         | 0.004    | 42 (46%)                         | 49 (54%)         | < 0.001  |
| Primary tumor (pT) stage             |                  |                  |          |                  |                  |          |                  |                  |          |                  |                  |          |                                  |                  |          |
| T1                                   | 115 (95%)        | 6 (5%)           | < 0.001  | 118 (98%)        | 3 (2%)           | 0.001    | 120 (99%)        | 1 (1%)           | 0.001    | 120 (99%)        | 1 (1%)           | < 0.001  | 113 (93%)                        | 8 (7%)           | < 0.001  |
| T2                                   | 80 (75%)         | 26 (25%)         |          | 99 (93%)         | 7 (7%)           |          | 106 (100%)       | 0 (0%)           |          | 99 (93%)         | 7 (7%)           |          | 74 (70%)                         | 32 (30%)         |          |
| T3                                   | 72 (60%)         | 48 (40%)         |          | 102 (85%)        | 18 (15%)         |          | 111 (93%)        | 9 (7%)           |          | 103 (86%)        | 17 (14%)         |          | 48 (40%)                         | 72 (60%)         |          |
| Lymph node metastases (n = 294)**    | 62 (56%)         | 48 (44%)         | < 0.001  | 98 (89%)         | 12 (11%)         | 0.397    | 103 (94%)        | 7 (6%)           | 0.044    | 94 (85%)         | 16 (15%)         | 0.003    | 45 (41%)                         | 65 (59%)         | < 0.001  |
| Synchronous metastases               | 28 (51%)         | 27 (49%)         | < 0.001  | 44 (80%)         | 11 (20%)         | 0.002    | 50 (91%)         | 5 (9%)           | 0.011    | 45 (82%)         | 10 (18%)         | 0.002    | 14 (25%)                         | 41 (75%)         | < 0.001  |
| Metachronous metastases (n = 282)*** | 17 (38%)         | 28 (62%)         | < 0.001  | 36 (80%)         | 9 (20%)          | < 0.001  | 42 (93%)         | 3 (7%)           | 0.027    | 33 (73%)         | 12 (27%)         | < 0.001  | 5 (11%)                          | 40 (89%)         | < 0.001  |
| Presence of ALT (n = 94)             | 14 (15%)         | 80 (85%)         | < 0.001  | 79 (84%)         | 15 (16%)         | 0.003    | 91 (97%)         | 3 (3%)           | 0.734    | 78 (83%)         | 16 (17%)         | < 0.001  | 7 (7%)                           | 87 (93%)         | < 0.001  |
| Loss of DAXX/ATRX (n = 80)           |                  |                  |          | 69 (86%)         | 11 (14%)         | 0.058    | 77 (96%)         | 3 (4%)           | 0.702    | 67 (84%)         | 13 (16%)         | 0.001    |                                  |                  |          |
| Loss of H3K36me3 (n = 28)            | 17 (61%)         | 11 (39%)         | 0.058    |                  |                  |          | 28 (100%)        | 0 (0%)           | 1.000    | 25 (89%)         | 3 (11%)          | 0.440    |                                  |                  |          |
| Loss of ARID1A (n = 10)              | 7 (70%)          | 3 (30%)          | 0.702    | 10 (100%)        | 0 (0%)           | 1.000    |                  |                  |          | 8 (80%)          | 2 (20%)          | 0.157    |                                  |                  |          |
| Deletion in CDKN2A (n = 25)          | 12 (48%)         | 13 (52%)         | 0.001    | 22 (88%)         | 3 (12%)          | 0.440    | 23 (92%)         | 2 (8%)           | 0.157    |                  |                  |          |                                  |                  |          |

Abbreviations: ALT, alternative lengthening of telomeres

\*Statistical analysis as reported is based on the presence or absence of functionality and not functional subtype.

\*\*Regional lymph nodes were present for evaluation in 294 cases.

\*\*\*The presence of metachronous metastasis was evaluated in patients that had not presented with synchronous metastases (n = 282).

A

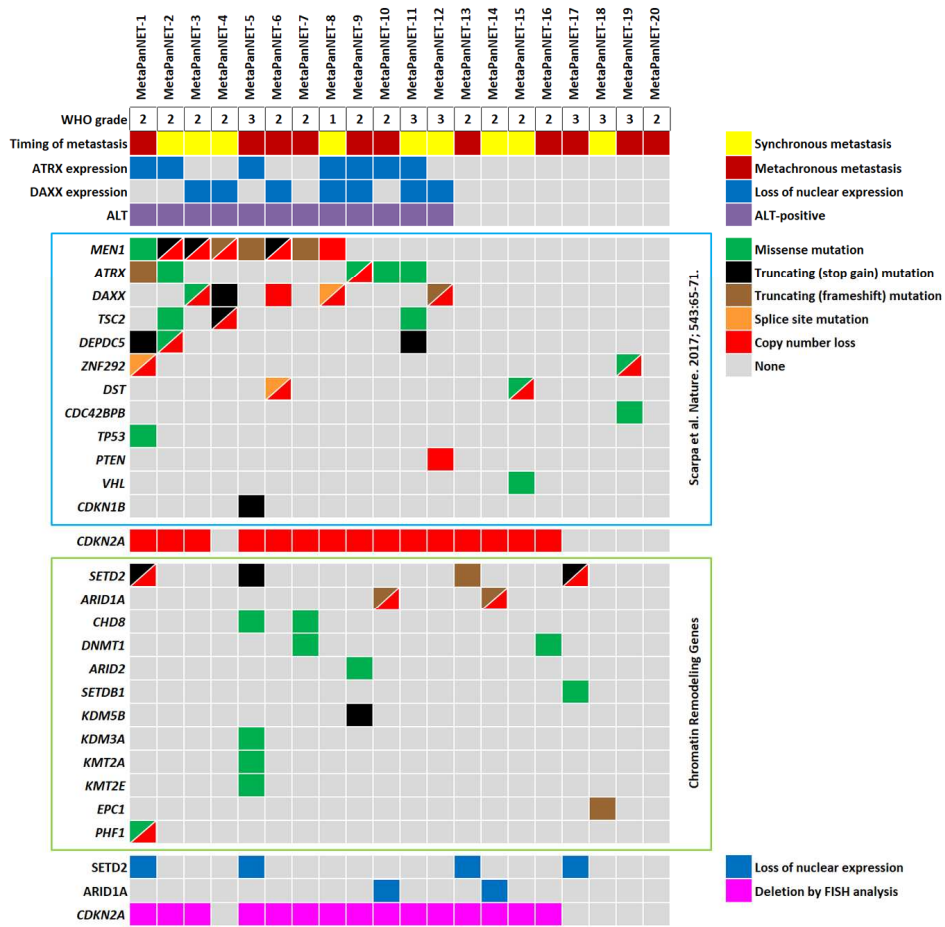

B

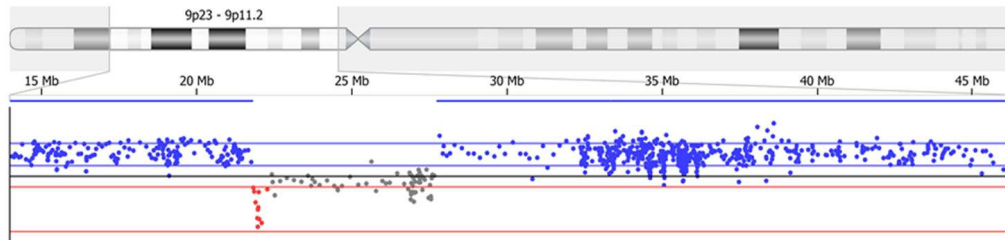

ACC

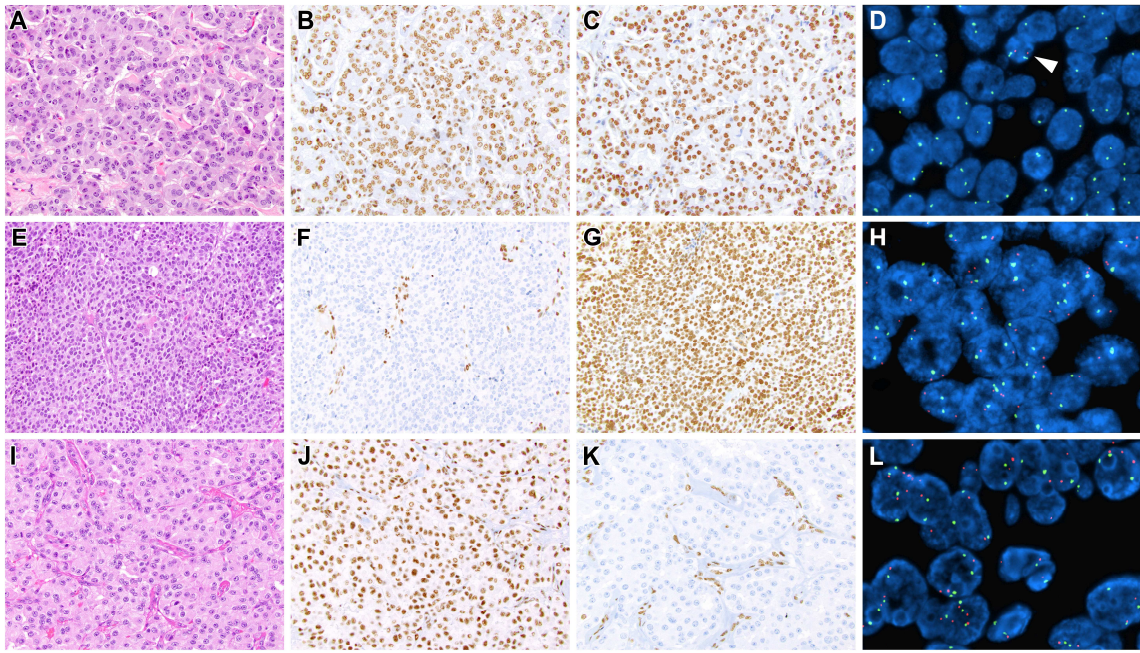

ACCEPTED MANUSCRIPT

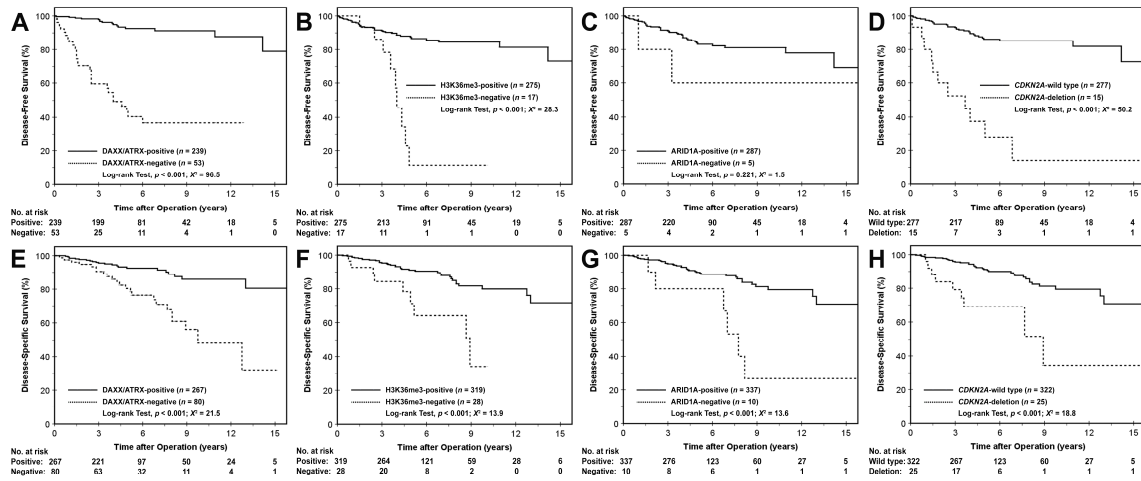

Supplement: NIHMS964734-supplement-supplement_1.pdf [file NIHMS964734-supplement-supplement_1.pdf]
